# Supplementary material
Source: publisher figshare collection journal article supplement (https://acs.figshare.com/ndownloader/files/25176916)
Supplement: Supplementary file 1 [file 25176916]

## Sheet: Database
Quelle	Overall load at flooding	Pulsation settings		chemical properties					Sieve plate and column geometries				Masstransfer/Phase/Packing(siehe Legend)			Phase ratio	Pulsation intensity
	v_G	f	A	ρC	ρD	μC	μD	σ	d	ε	S	D	Tr*	Cp*	Ct*	v_d/v_c	(f*A)
	[m/s]	[cycles/s]	[m]	[kg/m^3]	[kg/m^3]	[Pas]	[Pas]	[N/m]	[m]	[]	[m]	[m]	[]	[]	[]	[-]	[m*cycles/s]
McAllister	0.00905087	1.66667	0.003175	1240	772	0.00331	0.00342	0.0151	0.0028194	0.23	0.0492252	0.0254508	4	1	1	1.29399	0.00529167
McAllister	0.00542713	1.66667	0.0254	1240	772	0.00331	0.00342	0.0151	0.0028194	0.23	0.0492252	0.0254508	4	1	1	0.375536	0.0423333
McAllister	0.0118533	1.66667	0.0127	1240	772	0.00331	0.00342	0.0151	0.0028194	0.23	0.0492252	0.0254508	4	1	1	2.00429	0.0211667
McAllister	0.0108712	3.33333	0.003175	1240	772	0.00331	0.00342	0.0151	0.0028194	0.23	0.0492252	0.0254508	4	1	1	2.66857	0.0105833
McAllister	0.00658707	1.25	0.0254	1240	772	0.00331	0.00342	0.0151	0.0028194	0.23	0.0492252	0.0254508	4	1	1	0.669528	0.03175
McAllister	0.00747607	0.833333	0.003175	1240	772	0.00331	0.00342	0.0151	0.0028194	0.23	0.0492252	0.0254508	4	1	1	0.89485	0.00264583
McAllister	0.0110067	0.833333	0.0254	1240	772	0.00331	0.00342	0.0151	0.0028194	0.23	0.0492252	0.0254508	4	1	1	1.7897	0.0211667
McAllister	0.0101431	1.66667	0.0127	1240	772	0.00331	0.00342	0.0151	0.0028194	0.23	0.0492252	0.0254508	4	1	1	0.711429	0.0211667
McAllister	0.0114639	0.833333	0.0254	1240	772	0.00331	0.00342	0.0151	0.0028194	0.23	0.0492252	0.0254508	4	1	1	0.934286	0.0211667
McAllister	0.0138345	0.833333	0.0127	1240	772	0.00331	0.00342	0.0151	0.0028194	0.23	0.0492252	0.0254508	4	1	1	1.33429	0.0105833
McAllister	0.0107442	3.33333	0.00635	1240	772	0.00331	0.00342	0.0151	0.0028194	0.23	0.0492252	0.0254508	4	1	1	2.62571	0.0211667
McAllister	0.0095758	1.25	0.00635	1240	772	0.00331	0.00342	0.0151	0.0028194	0.23	0.0492252	0.0254508	4	1	1	1.42704	0.0079375
McAllister	0.010541	3.33333	0.003175	1240	772	0.00331	0.00342	0.0151	0.0028194	0.23	0.0492252	0.0254508	4	1	1	1.67167	0.0105833
McAllister	0.00789093	0.833333	0.00635	1240	772	0.00331	0.00342	0.0151	0.0028194	0.23	0.0492252	0.0254508	4	1	1	1	0.00529167
McAllister	0.011938	1.66667	0.00635	1240	772	0.00331	0.00342	0.0151	0.0028194	0.23	0.0492252	0.0254508	4	1	1	1.01429	0.0105833
McAllister	0.0098298	1.25	0.00635	1240	772	0.00331	0.00342	0.0151	0.0028194	0.23	0.0492252	0.0254508	4	1	1	2.31714	0.0079375
McAllister	0.0080772	1.25	0.0254	1240	772	0.00331	0.00342	0.0151	0.0028194	0.23	0.0492252	0.0254508	4	1	1	0.362857	0.03175
McAllister	0.0105156	1.66667	0.003175	1240	772	0.00331	0.00342	0.0151	0.0028194	0.23	0.0492252	0.0254508	4	1	1	0.774286	0.00529167
McAllister	0.0052324	1.66667	0.0254	1240	772	0.00331	0.00342	0.0151	0.0028194	0.23	0.0492252	0.0254508	4	1	1	0.765714	0.0423333
McAllister	0.0078994	0.833333	0.00635	1240	772	0.00331	0.00342	0.0151	0.0028194	0.23	0.0492252	0.0254508	4	1	1	0.332857	0.00529167
McAllister	0.00762	0.883333	0.00635	1240	772	0.00331	0.00342	0.0151	0.0028194	0.23	0.0492252	0.0254508	4	1	1	1.57143	0.00560917
McAllister	0.0140293	1.25	0.0127	1240	772	0.00331	0.00342	0.0151	0.0028194	0.23	0.0492252	0.0254508	4	1	1	1.36714	0.015875
McAllister	0.0103209	1.25	0.00635	1240	772	0.00331	0.00342	0.0151	0.0028194	0.23	0.0492252	0.0254508	4	1	1	0.741429	0.0079375
McAllister	0.0077978	1.25	0.003175	1240	772	0.00331	0.00342	0.0151	0.0028194	0.23	0.0492252	0.0254508	4	1	1	1.63143	0.00396875
McAllister	0.0115993	1.66667	0.00635	1240	772	0.00331	0.00342	0.0151	0.0028194	0.23	0.0492252	0.0254508	4	1	1	2.91429	0.0105833
McAllister	0.0077978	1.25	0.0254	1240	772	0.00331	0.00342	0.0151	0.0028194	0.23	0.0492252	0.0254508	4	1	1	1.63143	0.03175
McAllister	0.0109728	1.66667	0.00635	1240	772	0.00331	0.00342	0.0151	0.0028194	0.23	0.0492252	0.0254508	4	1	1	1.78112	0.0105833
McAllister	0.0122597	3.33333	0.003175	1240	772	0.00331	0.00342	0.0151	0.0028194	0.23	0.0492252	0.0254508	4	1	1	1.06857	0.0105833
McAllister	0.0085852	1.66667	0.003175	1240	772	0.00331	0.00342	0.0151	0.0028194	0.23	0.0492252	0.0254508	4	1	1	1.89714	0.00529167
McAllister	0.00526627	2.75	0.0127	1240	772	0.00331	0.00342	0.0151	0.0028194	0.23	0.0492252	0.0254508	4	1	1	0.334764	0.034925
McAllister	0.0093726	1.25	0.003175	1240	772	0.00331	0.00342	0.0151	0.0028194	0.23	0.0492252	0.0254508	4	1	1	0.581429	0.00396875
McAllister	0.00971973	3.33333	0.00635	1240	772	0.00331	0.00342	0.0151	0.0028194	0.23	0.0492252	0.0254508	4	1	1	0.64	0.0211667
McAllister	0.0147066	0.416667	0.0254	1240	772	0.00331	0.00342	0.0151	0.0028194	0.23	0.0492252	0.0254508	4	1	1	1.48143	0.0105833
McAllister	0.0141732	0.666667	0.0254	1240	772	0.00331	0.00342	0.0151	0.0028194	0.23	0.0492252	0.0254508	4	1	1	1.39143	0.0169333
McAllister	0.00971973	0.416667	0.0127	1240	772	0.00331	0.00342	0.0151	0.0028194	0.23	0.0492252	0.0254508	4	1	1	0.64	0.00529167
McAllister	0.0127931	2.5	0.00635	1240	772	0.00331	0.00342	0.0151	0.0028194	0.23	0.0492252	0.0254508	4	1	1	1.15857	0.015875
McAllister	0.0092202	3.33333	0.0127	1240	772	0.00331	0.00342	0.0151	0.0028194	0.23	0.0492252	0.0254508	4	1	1	1.33691	0.0423333
McAllister	0.0123105	0.833333	0.0127	1240	772	0.00331	0.00342	0.0151	0.0028194	0.23	0.0492252	0.0254508	4	1	1	2.12017	0.0105833
McAllister	0.0123783	2.5	0.00635	1240	772	0.00331	0.00342	0.0151	0.0028194	0.23	0.0492252	0.0254508	4	1	1	2.13734	0.015875
McAllister	0.0105156	3.33333	0.00635	1240	772	0.00331	0.00342	0.0151	0.0028194	0.23	0.0492252	0.0254508	4	1	1	1.66524	0.0211667
McAllister	0.0093726	0.416667	0.0127	1240	772	0.00331	0.00342	0.0151	0.0028194	0.23	0.0492252	0.0254508	4	1	1	2.16286	0.00529167
McAllister	0.0100245	2.5	0.0127	1240	772	0.00331	0.00342	0.0151	0.0028194	0.23	0.0492252	0.0254508	4	1	1	2.38286	0.03175
McAllister	0.006096	3.33333	0.0127	1240	772	0.00331	0.00342	0.0151	0.0028194	0.23	0.0492252	0.0254508	4	1	1	1.05714	0.0423333
McAllister	0.0130048	1.25	0.0127	1240	772	0.00331	0.00342	0.0151	0.0028194	0.23	0.0492252	0.0254508	4	1	1	2.29614	0.015875
McAllister	0.007747	0.433333	0.0127	1202	773	0.00237	0.00125	0.0158	0.0028194	0.23	0.0492252	0.0254508	4	1	1	0.307143	0.00550333
McAllister	0.0096266	0.833333	0.0127	1202	773	0.00237	0.00125	0.0158	0.0028194	0.23	0.0492252	0.0254508	4	1	1	0.624286	0.0105833
McAllister	0.0098806	1.2	0.0127	1202	773	0.00237	0.00125	0.0158	0.0028194	0.23	0.0492252	0.0254508	4	1	1	0.667143	0.01524
McAllister	0.00893233	1.63333	0.0127	1202	773	0.00237	0.00125	0.0158	0.0028194	0.23	0.0492252	0.0254508	4	1	1	0.507143	0.0207433
McAllister	0.00707813	2.56667	0.0127	1202	773	0.00237	0.00125	0.0158	0.0028194	0.23	0.0492252	0.0254508	4	1	1	0.194286	0.0325967
McAllister	0.00776393	0.833333	0.00635	1202	773	0.00237	0.00125	0.0158	0.0028194	0.23	0.0492252	0.0254508	4	1	1	0.31	0.00529167
McAllister	0.00910167	1.66667	0.00635	1202	773	0.00237	0.00125	0.0158	0.0028194	0.23	0.0492252	0.0254508	4	1	1	0.535714	0.0105833
McAllister	0.00928793	2.5	0.00635	1202	773	0.00237	0.00125	0.0158	0.0028194	0.23	0.0492252	0.0254508	4	1	1	0.567143	0.015875
McAllister	0.0083058	3.33333	0.00635	1202	773	0.00237	0.00125	0.0158	0.0028194	0.23	0.0492252	0.0254508	4	1	1	0.401429	0.0211667
McAllister	0.00856827	0.466667	0.0127	1124	828	0.00172	0.00248	0.0105	0.0028194	0.23	0.0492252	0.0254508	4	1	1	0.445714	0.00592667
McAllister	0.0115147	0.833333	0.0127	1124	828	0.00172	0.00248	0.0105	0.0028194	0.23	0.0492252	0.0254508	4	1	1	0.942857	0.0105833
McAllister	0.0115993	1.26667	0.0127	1124	828	0.00172	0.00248	0.0105	0.0028194	0.23	0.0492252	0.0254508	4	1	1	0.957143	0.0160867
McAllister	0.0095504	1.63333	0.0127	1124	828	0.00172	0.00248	0.0105	0.0028194	0.23	0.0492252	0.0254508	4	1	1	0.611429	0.0207433
McAllister	0.00778087	2.5	0.0127	1124	828	0.00172	0.00248	0.0105	0.0028194	0.23	0.0492252	0.0254508	4	1	1	0.312857	0.03175
McAllister	0.00509693	1.16667	0.0127	1362	773	0.0092	0.00148	0.0148	0.0028194	0.23	0.0492252	0.0254508	4	1	1	0.291845	0.0148167
McAllister	0.00496147	1.16667	0.0127	1366	773	0.01063	0.00156	0.0156	0.0028194	0.23	0.0492252	0.0254508	4	1	1	0.257511	0.0148167
McAllister	0.00496993	1.16667	0.0127	1362	773	0.00947	0.00146	0.0148	0.0028194	0.23	0.0492252	0.0254508	4	1	1	0.259657	0.0148167
McAllister	0.005461	1.16667	0.0127	1347	773	0.00727	0.00137	0.0153	0.0028194	0.23	0.0492252	0.0254508	4	1	1	0.38412	0.0148167
McAllister	0.00667173	1.16667	0.0127	1323	773	0.00462	0.00118	0.0154	0.0028194	0.23	0.0492252	0.0254508	4	1	1	0.690987	0.0148167
McAllister	0.00605367	1.16667	0.0127	1299	773	0.00499	0.00121	0.0144	0.0028194	0.23	0.0492252	0.0254508	4	1	1	0.534335	0.0148167
McAllister	0.0068072	1.16667	0.0127	1277	773	0.00402	0.00123	0.015	0.0028194	0.23	0.0492252	0.0254508	4	1	1	0.725322	0.0148167
McAllister	0.00700193	1.16667	0.0127	1264	773	0.00351	0.00114	0.0155	0.0028194	0.23	0.0492252	0.0254508	4	1	1	0.774678	0.0148167
McAllister	0.00762847	1.16667	0.0127	1248	773	0.00312	0.00115	0.0151	0.0028194	0.23	0.0492252	0.0254508	4	1	1	0.933476	0.0148167
McAllister	0.00842433	1.16667	0.0127	1234	773	0.00311	0.00139	0.0157	0.0028194	0.23	0.0492252	0.0254508	4	1	1	1.13519	0.0148167
McAllister	0.00851747	1.16667	0.0127	1221	773	0.00288	0.00137	0.0147	0.0028194	0.23	0.0492252	0.0254508	4	1	1	1.1588	0.0148167
McAllister	0.0085852	1.16667	0.0127	1221	773	0.00276	0.00128	0.0151	0.0028194	0.23	0.0492252	0.0254508	4	1	1	1.17597	0.0148167
McAllister	0.00887307	1.16667	0.0127	1211	773	0.00256	0.00131	0.0149	0.0028194	0.23	0.0492252	0.0254508	4	1	1	1.24893	0.0148167
McAllister	0.00921173	1.16667	0.0127	1202	773	0.00237	0.00125	0.0158	0.0028194	0.23	0.0492252	0.0254508	4	1	1	1.33476	0.0148167
McAllister	0.00956733	1.16667	0.0127	1173	773	0.00221	0.00125	0.0148	0.0028194	0.23	0.0492252	0.0254508	4	1	1	1.42489	0.0148167
McAllister	0.0089408	1.16667	0.0127	1175	773	0.0026	0.00148	0.0146	0.0028194	0.23	0.0492252	0.0254508	4	1	1	1.26609	0.0148167
McAllister	0.00931333	1.16667	0.0127	1154	773	0.00226	0.00132	0.0145	0.0028194	0.23	0.0492252	0.0254508	4	1	1	1.36052	0.0148167
McAllister	0.00943187	1.16667	0.0127	1141	773	0.0021	0.00119	0.0149	0.0028194	0.23	0.0492252	0.0254508	4	1	1	1.39056	0.0148167
McAllister	0.00946573	1.16667	0.0127	1128	773	0.00186	0.0011	0.0149	0.0028194	0.23	0.0492252	0.0254508	4	1	1	1.39914	0.0148167
McAllister	0.0056134	1.16667	0.0127	1353	828	0.00763	0.00322	0.0089	0.0028194	0.23	0.0492252	0.0254508	4	1	1	0.422747	0.0148167
McAllister	0.00631613	1.16667	0.0127	1338	828	0.00708	0.0036	0.0108	0.0028194	0.23	0.0492252	0.0254508	4	1	1	0.600858	0.0148167
McAllister	0.0065786	1.16667	0.0127	1326	828	0.00649	0.00351	0.0105	0.0028194	0.23	0.0492252	0.0254508	4	1	1	0.667382	0.0148167
McAllister	0.00745913	1.16667	0.0127	1307	828	0.00536	0.00361	0.0105	0.0028194	0.23	0.0492252	0.0254508	4	1	1	0.890558	0.0148167
McAllister	0.00798407	1.16667	0.0127	1297	828	0.00412	0.00318	0.0109	0.0028194	0.23	0.0492252	0.0254508	4	1	1	1.02361	0.0148167
McAllister	0.00859367	1.16667	0.0127	1276	828	0.00435	0.00352	0.0122	0.0028194	0.23	0.0492252	0.0254508	4	1	1	1.17811	0.0148167
McAllister	0.00938107	1.16667	0.0127	1270	828	0.00371	0.00356	0.011	0.0028194	0.23	0.0492252	0.0254508	4	1	1	1.37768	0.0148167
McAllister	0.00999913	1.16667	0.0127	1257	828	0.00345	0.00378	0.0109	0.0028194	0.23	0.0492252	0.0254508	4	1	1	1.53433	0.0148167
McAllister	0.00921173	1.16667	0.0127	1272	828	0.0038	0.00358	0.0107	0.0028194	0.23	0.0492252	0.0254508	4	1	1	1.33476	0.0148167
McAllister	0.0098298	1.16667	0.0127	1246	828	0.0034	0.00382	0.0106	0.0028194	0.23	0.0492252	0.0254508	4	1	1	1.49142	0.0148167
McAllister	0.0100838	1.16667	0.0127	1239	828	0.00315	0.00332	0.0109	0.0028194	0.23	0.0492252	0.0254508	4	1	1	1.55579	0.0148167
McAllister	0.0101769	1.16667	0.0127	1216	828	0.00275	0.00319	0.0124	0.0028194	0.23	0.0492252	0.0254508	4	1	1	1.5794	0.0148167
McAllister	0.010795	1.16667	0.0127	1189	828	0.00249	0.00319	0.0108	0.0028194	0.23	0.0492252	0.0254508	4	1	1	1.73605	0.0148167
McAllister	0.010795	1.16667	0.0127	1175	828	0.00235	0.00316	0.0107	0.0028194	0.23	0.0492252	0.0254508	4	1	1	1.73605	0.0148167
McAllister	0.009652	1.16667	0.0127	1197	828	0.00242	0.00226	0.0116	0.0028194	0.23	0.0492252	0.0254508	4	1	1	1.44635	0.0148167
McAllister	0.0102701	1.16667	0.0127	1157	828	0.00214	0.00248	0.0106	0.0028194	0.23	0.0492252	0.0254508	4	1	1	1.603	0.0148167
McAllister	0.0101769	1.16667	0.0127	1143	828	0.00206	0.0024	0.011	0.0028194	0.23	0.0492252	0.0254508	4	1	1	1.5794	0.0148167
McAllister	0.0101769	1.16667	0.0127	1130	828	0.00194	0.00222	0.011	0.0028194	0.23	0.0492252	0.0254508	4	1	1	1.5794	0.0148167
McAllister	0.00508847	1.16667	0.0127	1362	877	0.00791	0.00221	0.00966	0.0028194	0.23	0.0492252	0.0254508	4	1	1	0.2897	0.0148167
McAllister	0.0054356	1.16667	0.0127	1323	877	0.00567	0.00202	0.0096	0.0028194	0.23	0.0492252	0.0254508	4	1	1	0.377682	0.0148167
McAllister	0.00605367	1.16667	0.0127	1302	877	0.00488	0.00254	0.00982	0.0028194	0.23	0.0492252	0.0254508	4	1	1	0.534335	0.0148167
McAllister	0.00755227	1.16667	0.0127	1283	877	0.00402	0.00353	0.0093	0.0028194	0.23	0.0492252	0.0254508	4	1	1	0.914163	0.0148167
McAllister	0.00789093	1.16667	0.0127	1285	877	0.0045	0.00356	0.0089	0.0028194	0.23	0.0492252	0.0254508	4	1	1	1	0.0148167
McAllister	0.00885613	1.16667	0.0127	1276	877	0.00382	0.00446	0.00948	0.0028194	0.23	0.0492252	0.0254508	4	1	1	1.24464	0.0148167
McAllister	0.0100838	1.16667	0.0127	1261	877	0.00338	0.00475	0.00954	0.0028194	0.23	0.0492252	0.0254508	4	1	1	1.55579	0.0148167
McAllister	0.0112268	1.16667	0.0127	1231	877	0.00298	0.00569	0.00953	0.0028194	0.23	0.0492252	0.0254508	4	1	1	1.84549	0.0148167
McAllister	0.0100838	1.16667	0.0127	1224	877	0.00295	0.00492	0.00889	0.0028194	0.23	0.0492252	0.0254508	4	1	1	1.55579	0.0148167
McAllister	0.0109643	1.16667	0.0127	1226	877	0.00295	0.00513	0.00975	0.0028194	0.23	0.0492252	0.0254508	4	1	1	1.77897	0.0148167
McAllister	0.00763693	1.16667	0.0127	1285	877	0.0045	0.00356	0.0089	0.0028194	0.23	0.0492252	0.0254508	4	1	1	1.90032	0.0148167
McAllister	0.00773007	1.16667	0.0127	1285	877	0.0045	0.00356	0.0089	0.0028194	0.23	0.0492252	0.0254508	4	1	1	1.35309	0.0148167
McAllister	0.00789093	1.16667	0.0127	1285	877	0.0045	0.00356	0.0089	0.0028194	0.23	0.0492252	0.0254508	4	1	1	1	0.0148167
McAllister	0.00816187	1.16667	0.0127	1285	877	0.0045	0.00356	0.0089	0.0028194	0.23	0.0492252	0.0254508	4	1	1	0.653516	0.0148167
McAllister	0.00836507	1.16667	0.0127	1285	877	0.0045	0.00356	0.0089	0.0028194	0.23	0.0492252	0.0254508	4	1	1	0.411429	0.0148167
McAllister	0.0150029	3	0.00889	998	772	0.00106	0.000926	0.036	0.003175	0.246	0.0508	0.073025	4	1	2	1.13494	0.02667
McAllister	0.0159427	3	0.00889	998	772	0.00106	0.000926	0.036	0.003175	0.246	0.0508	0.073025	4	1	2	0.793333	0.02667
McAllister	0.0170349	3	0.00889	998	772	0.00106	0.000926	0.036	0.003175	0.246	0.0508	0.073025	4	1	2	0.586751	0.02667
McAllister	0.018288	3	0.00889	998	772	0.00106	0.000926	0.036	0.003175	0.246	0.0508	0.073025	4	1	2	0.444816	0.02667
McAllister	0.0203454	3	0.00889	998	772	0.00106	0.000926	0.036	0.003175	0.246	0.0508	0.073025	4	1	2	0.362245	0.02667
McAllister	0.012319	3	0.0127	998	772	0.00106	0.000926	0.036	0.003175	0.246	0.0508	0.073025	4	1	2	1.34677	0.0381
McAllister	0.0133181	3	0.0127	998	772	0.00106	0.000926	0.036	0.003175	0.246	0.0508	0.073025	4	1	2	0.861538	0.0381
McAllister	0.0148082	3	0.0127	998	772	0.00106	0.000926	0.036	0.003175	0.246	0.0508	0.073025	4	1	2	0.65	0.0381
McAllister	0.0154432	3	0.0127	998	772	0.00106	0.000926	0.036	0.003175	0.246	0.0508	0.073025	4	1	2	0.408494	0.0381
McAllister	0.0166878	3	0.0127	998	772	0.00106	0.000926	0.036	0.003175	0.246	0.0508	0.073025	4	1	2	0.27904	0.0381
McAllister	0.0182965	3	0.0127	998	772	0.00106	0.000926	0.036	0.003175	0.246	0.0508	0.073025	4	1	2	0.225057	0.0381
McAllister	0.0075184	3	0.018288	998	772	0.00106	0.000926	0.036	0.003175	0.246	0.0508	0.073025	4	1	2	3.07339	0.054864
McAllister	0.008509	3	0.018288	998	772	0.00106	0.000926	0.036	0.003175	0.246	0.0508	0.073025	4	1	2	1.46324	0.054864
McAllister	0.0109051	3	0.018288	998	772	0.00106	0.000926	0.036	0.003175	0.246	0.0508	0.073025	4	1	2	0.533333	0.054864
McAllister	0.0120057	3	0.018288	998	772	0.00106	0.000926	0.036	0.003175	0.246	0.0508	0.073025	4	1	2	0.337736	0.054864
McAllister	0.0147659	3	0.018288	998	772	0.00106	0.000926	0.036	0.003175	0.246	0.0508	0.073025	4	1	2	0.404187	0.054864
McAllister	0.0169672	3.5	0.00635	998	772	0.00106	0.000926	0.036	0.003175	0.246	0.0508	0.073025	4	1	2	1.36879	0.022225
McAllister	0.0164423	3.5	0.00635	998	772	0.00106	0.000926	0.036	0.003175	0.246	0.0508	0.073025	4	1	2	1.02714	0.022225
McAllister	0.0179155	3.5	0.00635	998	772	0.00106	0.000926	0.036	0.003175	0.246	0.0508	0.073025	4	1	2	0.981273	0.022225
McAllister	0.0176022	3.5	0.00635	998	772	0.00106	0.000926	0.036	0.003175	0.246	0.0508	0.073025	4	1	2	0.757396	0.022225
McAllister	0.0185081	3.5	0.00635	998	772	0.00106	0.000926	0.036	0.003175	0.246	0.0508	0.073025	4	1	2	0.672533	0.022225
McAllister	0.0196596	3.5	0.00635	998	772	0.00106	0.000926	0.036	0.003175	0.246	0.0508	0.073025	4	1	2	0.51864	0.022225
McAllister	0.0212513	3.5	0.00635	998	772	0.00106	0.000926	0.036	0.003175	0.246	0.0508	0.073025	4	1	2	0.42371	0.022225
McAllister	0.00933027	3	0.00635	998	772	0.00106	0.000926	0.036	0.0015875	0.246	0.0508	0.073025	4	1	2	1.63636	0.01905
McAllister	0.009779	3	0.00635	998	772	0.00106	0.000926	0.036	0.0015875	0.246	0.0508	0.073025	4	1	2	1.20841	0.01905
McAllister	0.00992293	3	0.00635	998	772	0.00106	0.000926	0.036	0.0015875	0.246	0.0508	0.073025	4	1	2	0.918167	0.01905
McAllister	0.00994833	3	0.00635	998	772	0.00106	0.000926	0.036	0.0015875	0.246	0.0508	0.073025	4	1	2	0.883013	0.01905
McAllister	0.0112437	3	0.00635	998	772	0.00106	0.000926	0.036	0.0015875	0.246	0.0508	0.073025	4	1	2	0.579073	0.01905
McAllister	0.0125391	3	0.00635	998	772	0.00106	0.000926	0.036	0.0015875	0.246	0.0508	0.073025	4	1	2	0.401135	0.01905
McAllister	0.0144103	3	0.00635	998	772	0.00106	0.000926	0.036	0.0015875	0.246	0.0508	0.073025	4	1	2	0.292331	0.01905
McAllister	0.0152908	3	0.00635	998	772	0.00106	0.000926	0.036	0.0015875	0.246	0.0508	0.073025	4	1	2	0.171206	0.01905
McAllister	0.00620607	3	0.009525	998	772	0.00106	0.000926	0.036	0.0015875	0.246	0.0508	0.073025	4	1	2	2.33182	0.028575
McAllister	0.00788247	3	0.009525	998	772	0.00106	0.000926	0.036	0.0015875	0.246	0.0508	0.073025	4	1	2	1.22727	0.028575
McAllister	0.00872913	3	0.009525	998	772	0.00106	0.000926	0.036	0.0015875	0.246	0.0508	0.073025	4	1	2	0.690164	0.028575
McAllister	0.0099314	3	0.009525	998	772	0.00106	0.000926	0.036	0.0015875	0.246	0.0508	0.073025	4	1	2	0.373536	0.028575
McAllister	0.0110913	3	0.009525	998	772	0.00106	0.000926	0.036	0.0015875	0.246	0.0508	0.073025	4	1	2	0.227741	0.028575
McAllister	0.00570653	3	0.0127	998	772	0.00106	0.000926	0.036	0.0015875	0.246	0.0508	0.073025	4	1	2	2.10599	0.0381
McAllister	0.0054356	3	0.0127	998	772	0.00106	0.000926	0.036	0.0015875	0.246	0.0508	0.073025	4	1	2	1.93151	0.0381
McAllister	0.00669713	3	0.0127	998	772	0.00106	0.000926	0.036	0.0015875	0.246	0.0508	0.073025	4	1	2	0.883333	0.0381
McAllister	0.00763693	3	0.0127	998	772	0.00106	0.000926	0.036	0.0015875	0.246	0.0508	0.073025	4	1	2	0.476268	0.0381
McAllister	0.00922867	3	0.0127	998	772	0.00106	0.000926	0.036	0.0015875	0.246	0.0508	0.073025	4	1	2	0.288416	0.0381
McAllister	0.0104648	3	0.0127	998	772	0.00106	0.000926	0.036	0.0015875	0.246	0.0508	0.073025	4	1	2	0.15514	0.0381
McAllister	0.00982133	1.5	0.0127	998	772	0.00106	0.000926	0.036	0.0015875	0.246	0.0508	0.073025	4	1	2	1.78177	0.01905
McAllister	0.0103293	1.5	0.0127	998	772	0.00106	0.000926	0.036	0.0015875	0.246	0.0508	0.073025	4	1	2	1.0132	0.01905
McAllister	0.0115655	1.5	0.0127	998	772	0.00106	0.000926	0.036	0.0015875	0.246	0.0508	0.073025	4	1	2	0.62619	0.01905
McAllister	0.012827	1.5	0.0127	998	772	0.00106	0.000926	0.036	0.0015875	0.246	0.0508	0.073025	4	1	2	0.426554	0.01905
McAllister	0.0144357	1.5	0.0127	998	772	0.00106	0.000926	0.036	0.0015875	0.246	0.0508	0.073025	4	1	2	0.296578	0.01905
McAllister	0.00925407	2	0.0127	998	772	0.00106	0.000926	0.036	0.0015875	0.246	0.0508	0.073025	4	1	2	1.61483	0.0254
McAllister	0.00941493	2	0.0127	998	772	0.00106	0.000926	0.036	0.0015875	0.246	0.0508	0.073025	4	1	2	0.828947	0.0254
McAllister	0.00963507	2	0.0127	998	772	0.00106	0.000926	0.036	0.0015875	0.246	0.0508	0.073025	4	1	2	0.829582	0.0254
McAllister	0.0100923	2	0.0127	998	772	0.00106	0.000926	0.036	0.0015875	0.246	0.0508	0.073025	4	1	2	0.585106	0.0254
McAllister	0.0110067	2	0.0127	998	772	0.00106	0.000926	0.036	0.0015875	0.246	0.0508	0.073025	4	1	2	0.534829	0.0254
McAllister	0.0111337	2	0.0127	998	772	0.00106	0.000926	0.036	0.0015875	0.246	0.0508	0.073025	4	1	2	0.382755	0.0254
McAllister	0.0114469	2	0.0127	998	772	0.00106	0.000926	0.036	0.0015875	0.246	0.0508	0.073025	4	1	2	0.269484	0.0254
McAllister	0.0130217	2	0.0127	998	772	0.00106	0.000926	0.036	0.0015875	0.246	0.0508	0.073025	4	1	2	0.167806	0.0254
McAllister	0.00654473	2.5	0.0127	998	772	0.00106	0.000926	0.036	0.0015875	0.246	0.0508	0.073025	4	1	2	2.49774	0.03175
McAllister	0.00709507	2.5	0.0127	998	772	0.00106	0.000926	0.036	0.0015875	0.246	0.0508	0.073025	4	1	2	0.985782	0.03175
McAllister	0.0079502	2.5	0.0127	998	772	0.00106	0.000926	0.036	0.0015875	0.246	0.0508	0.073025	4	1	2	0.507223	0.03175
McAllister	0.00928793	2.5	0.0127	998	772	0.00106	0.000926	0.036	0.0015875	0.246	0.0508	0.073025	4	1	2	0.301305	0.03175
McAllister	0.0107865	2.5	0.0127	998	772	0.00106	0.000926	0.036	0.0015875	0.246	0.0508	0.073025	4	1	2	0.190654	0.03175
McAllister	0.0137922	3	0.00635	998	772	0.00106	0.000926	0.036	0.003175	0.246	0.0127	0.073025	4	1	2	0.766811	0.01905
McAllister	0.0147574	3	0.00635	998	772	0.00106	0.000926	0.036	0.003175	0.246	0.0127	0.073025	4	1	2	0.483404	0.01905
McAllister	0.0161459	3	0.00635	998	772	0.00106	0.000926	0.036	0.003175	0.246	0.0127	0.073025	4	1	2	0.323387	0.01905
McAllister	0.0167809	3	0.00635	998	772	0.00106	0.000926	0.036	0.003175	0.246	0.0127	0.073025	4	1	2	0.167943	0.01905
McAllister	0.0184319	3	0.00635	998	772	0.00106	0.000926	0.036	0.003175	0.246	0.0127	0.073025	4	1	2	0.105637	0.01905
McAllister	0.0142663	3	0.00635	998	772	0.00106	0.000926	0.036	0.003175	0.246	0.0254	0.073025	4	1	2	0.589623	0.01905
McAllister	0.0142748	3	0.00635	998	772	0.00106	0.000926	0.036	0.003175	0.246	0.0254	0.073025	4	1	2	0.575701	0.01905
McAllister	0.0156718	3	0.00635	998	772	0.00106	0.000926	0.036	0.003175	0.246	0.0254	0.073025	4	1	2	0.423846	0.01905
McAllister	0.0174244	3	0.00635	998	772	0.00106	0.000926	0.036	0.003175	0.246	0.0254	0.073025	4	1	2	0.345098	0.01905
McAllister	0.0169503	3	0.00635	998	772	0.00106	0.000926	0.036	0.003175	0.246	0.0254	0.073025	4	1	2	0.308497	0.01905
McAllister	0.0186182	3	0.00635	998	772	0.00106	0.000926	0.006	0.003175	0.246	0.0254	0.073025	4	1	2	0.235393	0.01905
McAllister	0.00879687	3	0.0127	998	772	0.00106	0.000926	0.036	0.003175	0.246	0.0381	0.073025	4	1	2	1.04528	0.0381
McAllister	0.0123105	3	0.0127	998	772	0.00106	0.000925	0.035	0.003175	0.246	0.0381	0.073025	4	1	2	0.379507	0.0381
McAllister	0.0136821	3	0.0127	998	772	0.00106	0.000926	0.035	0.003175	0.246	0.0381	0.073025	4	1	2	0.257588	0.0381
McAllister	0.0152739	3	0.0127	998	772	0.00106	0.000926	0.036	0.003175	0.246	0.0381	0.073025	4	1	2	0.186842	0.0381
McAllister	0.0168148	3	0.0127	998	772	0.00106	0.000926	0.036	0.003175	0.246	0.0381	0.073025	4	1	2	0.132915	0.0381
McAllister	0.0170857	3	0.00635	998	772	0.00106	0.000926	0.036	0.003175	0.246	0.0762	0.073025	4	1	2	0.949758	0.01905
McAllister	0.0179832	3	0.00635	998	772	0.00106	0.000926	0.036	0.003175	0.246	0.0762	0.073025	4	1	2	0.672441	0.01905
McAllister	0.0195241	3	0.00635	998	772	0.00106	0.000926	0.036	0.003175	0.246	0.0762	0.073025	4	1	2	0.538359	0.01905
McAllister	0.0210905	3	0.00635	998	772	0.00106	0.000926	0.036	0.003175	0.246	0.0762	0.073025	4	1	2	0.432432	0.01905
McAllister	0.0222843	3	0.00635	998	772	0.00106	0.000925	0.035	0.003175	0.246	0.0762	0.073025	4	1	2	0.316658	0.01905
McAllister	0.010922	3	0.006096	998	864	0.00106	0.000585	0.034	0.003175	0.246	0.0508	0.073025	4	1	2	4.70796	0.018288
McAllister	0.0113199	3	0.006096	998	864	0.00106	0.000585	0.034	0.003175	0.246	0.0508	0.073025	4	1	2	2.0595	0.018288
McAllister	0.0122089	3	0.006096	998	864	0.00106	0.000585	0.034	0.003175	0.246	0.0508	0.073025	4	1	2	1.24611	0.018288
McAllister	0.0121835	3	0.006096	998	864	0.00106	0.000585	0.034	0.003175	0.246	0.0508	0.073025	4	1	2	0.87859	0.018288
McAllister	0.0127593	3	0.006096	998	864	0.00106	0.000585	0.034	0.003175	0.246	0.0508	0.073025	4	1	2	0.728211	0.018288
McAllister	0.0128101	3	0.006096	998	864	0.00106	0.000585	0.034	0.003175	0.246	0.0508	0.073025	4	1	2	0.434123	0.018288
McAllister	0.0130133	3	0.006096	998	864	0.00106	0.000585	0.034	0.003175	0.246	0.0508	0.073025	4	1	2	0.455492	0.018288
McAllister	0.0137922	3	0.006096	998	864	0.00106	0.000585	0.034	0.003175	0.246	0.0508	0.073025	4	1	2	0.282677	0.018288
McAllister	0.0134027	3	0.00635	998	864	0.00106	0.000585	0.034	0.003175	0.246	0.0508	0.073025	4	1	2	1.76265	0.01905
McAllister	0.0141732	3	0.00635	998	864	0.00106	0.000585	0.034	0.003175	0.246	0.0508	0.073025	4	1	2	1.11631	0.01905
McAllister	0.0135636	3	0.00635	998	864	0.00106	0.000585	0.034	0.003175	0.246	0.0508	0.073025	4	1	2	0.711538	0.01905
McAllister	0.0134789	3	0.00635	998	864	0.00106	0.000585	0.034	0.003175	0.246	0.0508	0.073025	4	1	2	0.641237	0.01905
McAllister	0.0154601	3	0.00635	998	864	0.00106	0.000585	0.034	0.003175	0.246	0.0508	0.073025	4	1	2	0.433281	0.01905
McAllister	0.0159766	3	0.00635	998	864	0.00106	0.000585	0.034	0.003175	0.246	0.0508	0.073025	4	1	2	0.272421	0.01905
McAllister	0.00773007	3	0.009906	998	864	0.00106	0.000585	0.034	0.003175	0.246	0.0508	0.073025	4	1	2	2.9869	0.029718
McAllister	0.00832273	3	0.009906	998	864	0.00106	0.000585	0.034	0.003175	0.246	0.0508	0.073025	4	1	2	1.22398	0.029718
McAllister	0.0109643	3	0.009906	998	864	0.00106	0.000585	0.034	0.003175	0.246	0.0508	0.073025	4	1	2	0.523529	0.029718
McAllister	0.0132673	3	0.009906	998	864	0.00106	0.000585	0.034	0.003175	0.246	0.0508	0.073025	4	1	2	0.214729	0.029718
McAllister	0.0145288	3	0.009906	998	864	0.00106	0.000585	0.034	0.003175	0.246	0.0508	0.073025	4	1	2	0.157895	0.029718
McAllister	0.006858	3	0.013208	998	864	0.00106	0.000585	0.034	0.003175	0.246	0.0508	0.073025	4	1	2	2.61607	0.039624
McAllister	0.0080264	3	0.013208	998	864	0.00106	0.000585	0.034	0.003175	0.246	0.0508	0.073025	4	1	2	1.18433	0.039624
McAllister	0.00872067	3	0.013208	998	864	0.00106	0.000585	0.034	0.003175	0.246	0.0508	0.073025	4	1	2	0.619497	0.039624
McAllister	0.00944033	3	0.013208	998	864	0.00106	0.000585	0.034	0.003175	0.246	0.0508	0.073025	4	1	2	0.324228	0.039624
McAllister	0.0108881	3	0.013208	998	864	0.00106	0.000585	0.034	0.003175	0.246	0.0508	0.073025	4	1	2	0.217803	0.039624
McAllister	0.00442807	3	0.022098	998	864	0.00106	0.000585	0.034	0.003175	0.246	0.0508	0.073025	4	1	2	5.62025	0.066294
McAllister	0.00385233	3	0.022098	998	864	0.00106	0.000585	0.034	0.003175	0.246	0.0508	0.073025	4	1	2	1.02222	0.066294
McAllister	0.00399627	3	0.022098	998	864	0.00106	0.000585	0.034	0.003175	0.246	0.0508	0.073025	4	1	2	0.45679	0.066294
McAllister	0.0045974	3	0.022098	998	864	0.00106	0.000585	0.034	0.003175	0.246	0.0508	0.073025	4	1	2	0.251152	0.066294
McAllister	0.00483447	3	0.022098	998	864	0.00106	0.000585	0.034	0.003175	0.246	0.0508	0.073025	4	1	2	0.0773585	0.066294
McAllister	0.008382	4	0.006096	998	864	0.00106	0.000585	0.034	0.003175	0.246	0.0508	0.073025	4	1	2	3.30435	0.024384
McAllister	0.008636	4	0.006096	998	864	0.00106	0.000585	0.034	0.003175	0.246	0.0508	0.073025	4	1	2	1.38318	0.024384
McAllister	0.010287	4	0.006096	998	864	0.00106	0.000585	0.034	0.003175	0.246	0.0508	0.073025	4	1	2	1.77397	0.024384
McAllister	0.0101092	4	0.006096	998	864	0.00106	0.000585	0.034	0.003175	0.246	0.0508	0.073025	4	1	2	0.871473	0.024384
McAllister	0.0113877	4	0.006096	998	864	0.00106	0.000585	0.034	0.003175	0.246	0.0508	0.073025	4	1	2	0.582353	0.024384
McAllister	0.0123275	4	0.006096	998	864	0.00106	0.000585	0.034	0.003175	0.246	0.0508	0.073025	4	1	2	0.369708	0.024384
McAllister	0.0133096	4	0.006096	998	864	0.00106	0.000585	0.034	0.003175	0.246	0.0508	0.073025	4	1	2	0.250597	0.024384
McAllister	0.00616373	5	0.006096	998	864	0.00106	0.000585	0.034	0.003175	0.246	0.0508	0.073025	4	1	2	2.23556	0.03048
McAllister	0.00720513	5	0.006096	998	864	0.00106	0.000585	0.034	0.003175	0.246	0.0508	0.073025	4	1	2	1.58663	0.03048
McAllister	0.00788247	5	0.006096	998	864	0.00106	0.000585	0.034	0.003175	0.246	0.0508	0.073025	4	1	2	1.12557	0.03048
McAllister	0.0100584	5	0.006096	998	864	0.00106	0.000585	0.034	0.003175	0.246	0.0508	0.073025	4	1	2	0.399293	0.03048
McAllister	0.0126323	5	0.006096	998	864	0.00106	0.000585	0.034	0.003175	0.246	0.0508	0.073025	4	1	2	0.162899	0.03048
McAllister	0.0062484	6	0.006096	998	864	0.00106	0.000585	0.034	0.003175	0.246	0.0508	0.073025	4	1	2	2.28	0.036576
McAllister	0.00719667	6	0.006096	998	864	0.00106	0.000585	0.034	0.003175	0.246	0.0508	0.073025	4	1	2	0.94508	0.036576
McAllister	0.00785707	6	0.006096	998	864	0.00106	0.000585	0.034	0.003175	0.246	0.0508	0.073025	4	1	2	0.45	0.036576
McAllister	0.00913553	6	0.006096	998	864	0.00106	0.000585	0.034	0.003175	0.246	0.0508	0.073025	4	1	2	0.26792	0.036576
McAllister	0.011557	6	0.006096	998	864	0.00106	0.000585	0.034	0.003175	0.246	0.0508	0.073025	4	1	2	0.107056	0.036576
McAllister	0.00588433	7	0.006096	998	864	0.00106	0.000585	0.034	0.003175	0.246	0.0508	0.073025	4	1	2	2.04825	0.042672
McAllister	0.00587587	7	0.006096	998	864	0.00106	0.000585	0.034	0.003175	0.246	0.0508	0.073025	4	1	2	1.15528	0.042672
McAllister	0.00661247	7	0.006096	998	864	0.00106	0.000585	0.034	0.003175	0.246	0.0508	0.073025	4	1	2	0.812065	0.042672
McAllister	0.0057912	7	0.006096	998	864	0.00106	0.000585	0.034	0.003175	0.246	0.0508	0.073025	4	1	2	0.297913	0.042672
McAllister	0.00826347	7	0.006096	998	864	0.00106	0.000585	0.034	0.003175	0.246	0.0508	0.073025	4	1	2	0.14152	0.042672
McAllister	0.00499533	3	0.00635	998	864	0.00106	0.000585	0.034	0.003175	0.246	0.0127	0.073025	4	1	2	1.57642	0.01905
McAllister	0.00865293	3	0.00635	998	864	0.00106	0.000585	0.034	0.003175	0.246	0.0127	0.073025	4	1	2	2.30744	0.01905
McAllister	0.0185674	3	0.00635	998	864	0.00106	0.000585	0.034	0.003175	0.246	0.0127	0.073025	4	1	2	6.00639	0.01905
McAllister	0.00823807	3	0.00635	998	864	0.00106	0.000585	0.034	0.003175	0.246	0.0127	0.073025	4	1	2	1.2164	0.01905
McAllister	0.0166455	3	0.00635	998	864	0.00106	0.000585	0.034	0.003175	0.246	0.0127	0.073025	4	1	2	3.3592	0.01905
McAllister	0.00944033	3	0.00635	998	864	0.00106	0.000585	0.034	0.003175	0.246	0.0127	0.073025	4	1	2	0.998208	0.01905
McAllister	0.0094996	3	0.00635	998	864	0.00106	0.000585	0.034	0.003175	0.246	0.0127	0.073025	4	1	2	0.975352	0.01905
McAllister	0.00991447	3	0.00635	998	864	0.00106	0.000585	0.034	0.003175	0.246	0.0127	0.073025	4	1	2	0.747761	0.01905
McAllister	0.0110151	3	0.00635	998	864	0.00106	0.000585	0.034	0.003175	0.246	0.0127	0.073025	4	1	2	0.707349	0.01905
McAllister	0.0102362	3	0.00635	998	864	0.00106	0.000585	0.034	0.003175	0.246	0.0127	0.073025	4	1	2	0.544061	0.01905
McAllister	0.0109897	3	0.00635	998	864	0.00106	0.000585	0.034	0.003175	0.246	0.0127	0.073025	4	1	2	0.413943	0.01905
McAllister	0.0110744	3	0.00635	998	864	0.00106	0.000585	0.034	0.003175	0.246	0.0127	0.073025	4	1	2	0.415584	0.01905
McAllister	0.0124968	3	0.00635	998	864	0.00106	0.000585	0.034	0.003175	0.246	0.0127	0.073025	4	1	2	0.236181	0.01905
McAllister	0.0127169	3	0.00635	998	864	0.00106	0.000585	0.034	0.003175	0.246	0.0127	0.073025	4	1	2	0.236214	0.01905
McAllister	0.0147405	3	0.00635	998	864	0.00106	0.000585	0.034	0.003175	0.246	0.0127	0.073025	4	1	2	0.16377	0.01905
McAllister	0.0150114	3	0.00635	998	864	0.00106	0.000585	0.034	0.003175	0.246	0.0127	0.073025	4	1	2	0.16415	0.01905
McAllister	0.0166201	3	0.00635	998	864	0.00106	0.000585	0.034	0.003175	0.246	0.0127	0.073025	4	1	2	0.0845304	0.01905
McAllister	0.0169079	3	0.00635	998	864	0.00106	0.000585	0.034	0.003175	0.246	0.0127	0.073025	4	1	2	0.0847366	0.01905
McAllister	0.0173567	3	0.00635	998	864	0.00106	0.000585	0.034	0.003175	0.246	0.0762	0.073025	4	1	2	1.51534	0.01905
McAllister	0.0142325	3	0.00635	998	864	0.00106	0.000585	0.034	0.003175	0.246	0.0762	0.073025	4	1	2	4.18827	0.01905
McAllister	0.0178562	3	0.00635	998	864	0.00106	0.000585	0.034	0.003175	0.246	0.0762	0.073025	4	1	2	1.02011	0.01905
McAllister	0.0190839	3	0.00635	998	864	0.00106	0.000585	0.034	0.003175	0.246	0.0762	0.073025	4	1	2	0.760937	0.01905
McAllister	0.0193548	3	0.00635	998	864	0.00106	0.000585	0.034	0.003175	0.246	0.0762	0.073025	4	1	2	0.508911	0.01905
McAllister	0.0208957	3	0.00635	998	864	0.00106	0.000585	0.034	0.003175	0.246	0.0762	0.073025	4	1	2	0.404667	0.01905
McAllister	0.0216916	3	0.00635	998	864	0.00106	0.000585	0.034	0.003175	0.246	0.0762	0.073025	4	1	2	0.340659	0.01905
McAllister	0.0112437	3	0.006096	998	864	0.00106	0.000585	0.034	0.003175	0.246	0.0508	0.073025	4	1	2	2.05991	0.018288
McAllister	0.0132757	3	0.006096	998	864	0.00106	0.000585	0.034	0.003175	0.246	0.0508	0.073025	4	1	2	0.842538	0.018288
McAllister	0.0150283	3	0.006096	998	854	0.00106	0.000585	0.034	0.003175	0.246	0.0508	0.073025	4	1	2	0.417732	0.018288
McAllister	0.0180848	3	0.006096	998	864	0.00106	0.000585	0.034	0.003175	0.246	0.0508	0.073025	4	1	2	0.277512	0.018288
McAllister	0.0116417	2	0.006096	998	864	0.00106	0.000585	0.034	0.003175	0.131	0.0508	0.073025	4	1	2	1.16195	0.012192
McAllister	0.0128778	2	0.006096	998	864	0.00106	0.000585	0.034	0.003175	0.131	0.0508	0.073025	4	1	2	1.07221	0.012192
McAllister	0.0121327	2	0.006096	998	864	0.00106	0.000585	0.034	0.003175	0.131	0.0508	0.073025	4	1	2	0.641466	0.012192
McAllister	0.0128185	2	0.006096	998	864	0.00106	0.000585	0.034	0.003175	0.131	0.0508	0.073025	4	1	2	0.450192	0.012192
McAllister	0.0141139	2	0.006096	998	864	0.00106	0.000585	0.034	0.003175	0.131	0.0508	0.073025	4	1	2	0.329346	0.012192
McAllister	0.0150114	2	0.006096	998	864	0.00106	0.000585	0.034	0.003175	0.131	0.0508	0.073025	4	1	2	0.210239	0.012192
McAllister	0.0122089	2.5	0.006096	998	864	0.00106	0.000585	0.034	0.003175	0.131	0.0508	0.073025	4	1	2	1.29618	0.01524
McAllister	0.0116078	2.5	0.006096	998	864	0.00106	0.000585	0.034	0.003175	0.131	0.0508	0.073025	4	1	2	0.616745	0.01524
McAllister	0.0127593	2.5	0.006096	998	864	0.00106	0.000585	0.034	0.003175	0.131	0.0508	0.073025	4	1	2	0.571429	0.01524
McAllister	0.0130556	2.5	0.006096	998	864	0.00106	0.000585	0.034	0.003175	0.131	0.0508	0.073025	4	1	2	0.344377	0.01524
McAllister	0.0128863	2.5	0.006096	998	864	0.00106	0.000585	0.034	0.003175	0.131	0.0508	0.073025	4	1	2	0.198425	0.01524
McAllister	0.0114893	3	0.006096	998	864	0.00106	0.000585	0.034	0.003175	0.172	0.0508	0.073025	4	1	2	2.13395	0.018288
McAllister	0.0126577	3	0.006096	998	864	0.00106	0.000585	0.034	0.003175	0.172	0.0508	0.073025	4	1	2	1.29647	0.018288
McAllister	0.0128693	3	0.006096	998	864	0.00106	0.000585	0.034	0.003175	0.172	0.0508	0.073025	4	1	2	0.878863	0.018288
McAllister	0.0143595	3	0.006096	998	864	0.00106	0.000585	0.034	0.003175	0.172	0.0508	0.073025	4	1	2	1.0071	0.018288
McAllister	0.0135975	3	0.006096	998	864	0.00106	0.000585	0.034	0.003175	0.172	0.0508	0.073025	4	1	2	0.858796	0.018288
McAllister	0.0139361	3	0.006096	998	864	0.00106	0.000585	0.034	0.003175	0.172	0.0508	0.073025	4	1	2	0.563153	0.018288
McAllister	0.0144441	3	0.006096	998	864	0.00106	0.000585	0.034	0.003175	0.172	0.0508	0.073025	4	1	2	0.57235	0.018288
McAllister	0.0151638	3	0.006096	998	864	0.00106	0.000585	0.034	0.003175	0.172	0.0508	0.073025	4	1	2	0.410236	0.018288
McAllister	0.0152654	3	0.006096	998	864	0.00106	0.000585	0.034	0.003175	0.172	0.0508	0.073025	4	1	2	0.384793	0.018288
McAllister	0.0160697	3	0.006096	998	864	0.00106	0.000585	0.034	0.003175	0.172	0.0508	0.073025	4	1	2	0.267869	0.018288
McAllister	0.0169333	3	0.006096	998	864	0.00106	0.000585	0.034	0.003175	0.172	0.0508	0.073025	4	1	2	0.223242	0.018288
McAllister	0.00618913	3	0.006096	998	864	0.00106	0.000585	0.034	0.003175	0.172	0.0508	0.073025	4	1	2	2.20614	0.018288
McAllister	0.00905933	3	0.006096	998	864	0.00106	0.000585	0.034	0.003175	0.172	0.0508	0.073025	4	1	2	3.67249	0.018288
McAllister	0.00696807	3	0.006096	998	864	0.00106	0.000585	0.034	0.003175	0.172	0.0508	0.073025	4	1	2	0.900693	0.018288
McAllister	0.00917787	3	0.006096	998	864	0.00106	0.000585	0.034	0.003175	0.172	0.0508	0.073025	4	1	2	1.49195	0.018288
McAllister	0.0080772	3	0.006096	998	864	0.00106	0.000585	0.034	0.003175	0.172	0.0508	0.073025	4	1	2	0.5264	0.018288
McAllister	0.008382	3	0.006096	998	864	0.00106	0.000585	0.034	0.003175	0.172	0.0508	0.073025	4	1	2	0.520737	0.018288
McAllister	0.00900007	3	0.006096	998	864	0.00106	0.000585	0.034	0.003175	0.172	0.0508	0.073025	4	1	2	0.260973	0.018288
McAllister	0.0100499	3	0.006096	998	864	0.00106	0.000585	0.034	0.003175	0.172	0.0508	0.073025	4	1	2	0.126186	0.018288
McAllister	0.00982133	3	0.006096	998	864	0.00106	0.000585	0.034	0.003175	0.172	0.0508	0.073025	4	1	2	0.0710988	0.018288
McAllister	0.008763	4	0.006096	998	864	0.00106	0.000585	0.034	0.003175	0.172	0.0508	0.073025	4	1	2	1.3903	0.024384
McAllister	0.00978747	4	0.006096	998	864	0.00106	0.000585	0.034	0.003175	0.172	0.0508	0.073025	4	1	2	1.63927	0.024384
McAllister	0.00982133	4	0.006096	998	864	0.00106	0.000585	0.034	0.003175	0.172	0.0508	0.073025	4	1	2	0.856	0.024384
McAllister	0.0106595	4	0.006096	998	864	0.00106	0.000585	0.034	0.003175	0.172	0.0508	0.073025	4	1	2	1.0144	0.024384
McAllister	0.00953347	4	0.006096	998	864	0.00106	0.000585	0.034	0.003175	0.172	0.0508	0.073025	4	1	2	0.8016	0.024384
McAllister	0.0101685	4	0.006096	998	864	0.00106	0.000585	0.034	0.003175	0.172	0.0508	0.073025	4	1	2	0.60992	0.024384
McAllister	0.0106257	4	0.006096	998	864	0.00106	0.000585	0.034	0.003175	0.172	0.0508	0.073025	4	1	2	0.479953	0.024384
McAllister	0.0105495	4	0.006096	998	864	0.00106	0.000585	0.034	0.003175	0.172	0.0508	0.073025	4	1	2	0.448837	0.024384
McAllister	0.0114131	4	0.006096	998	864	0.00106	0.000585	0.034	0.003175	0.172	0.0508	0.073025	4	1	2	0.297401	0.024384
McAllister	0.0110067	4	0.006096	998	864	0.00106	0.000585	0.034	0.003175	0.172	0.0508	0.073025	4	1	2	0.225259	0.024384
McAllister	0.0112861	4	0.006096	998	864	0.00106	0.000585	0.034	0.003175	0.172	0.0508	0.073025	4	1	2	0.235403	0.024384
McAllister	0.01143	4	0.006096	998	864	0.00106	0.000585	0.034	0.003175	0.172	0.0508	0.073025	4	1	2	0.156812	0.024384
McAllister	0.0119973	4	0.006096	998	864	0.00106	0.000585	0.034	0.003175	0.172	0.0508	0.073025	4	1	2	0.119273	0.024384
McAllister	0.0115655	4	0.006096	998	864	0.00106	0.000585	0.034	0.003175	0.172	0.0508	0.073025	4	1	2	0.0781373	0.024384
McAllister	0.0115316	4	0.006096	998	864	0.00106	0.000585	0.034	0.003175	0.172	0.0508	0.073025	4	1	2	0.0749803	0.024384
McAllister	0.0123613	4	0.006096	998	864	0.00106	0.000585	0.034	0.003175	0.172	0.0508	0.073025	4	1	2	0.123077	0.024384
McAllister	0.0126746	3	0.006096	998	864	0.00106	0.000585	0.034	0.003175	0.39	0.0508	0.073025	4	1	2	1.34272	0.018288
McAllister	0.0135551	3	0.006096	998	864	0.00106	0.000585	0.034	0.003175	0.39	0.0508	0.073025	4	1	2	0.887972	0.018288
McAllister	0.0142748	3	0.006096	998	864	0.00106	0.000585	0.034	0.003175	0.39	0.0508	0.073025	4	1	2	0.613397	0.018288
McAllister	0.0155279	3	0.006096	998	864	0.00106	0.000585	0.034	0.003175	0.39	0.0508	0.073025	4	1	2	0.466027	0.018288
McAllister	0.0173313	3	0.006096	998	864	0.00106	0.000585	0.034	0.003175	0.39	0.0508	0.073025	4	1	2	0.23462	0.018288
McAllister	0.0177123	3	0.00635	998	864	0.00106	0.000585	0.034	0.003175	0.39	0.0508	0.073025	4	1	2	1.53576	0.01905
McAllister	0.0168148	3	0.00635	998	864	0.00106	0.000585	0.034	0.003175	0.39	0.0508	0.073025	4	1	2	1.16104	0.01905
McAllister	0.0186351	3	0.00635	998	864	0.00106	0.000585	0.034	0.003175	0.39	0.0508	0.073025	4	1	2	0.724922	0.01905
McAllister	0.0202099	3	0.00635	998	864	0.00106	0.000585	0.034	0.003175	0.39	0.0508	0.073025	4	1	2	0.490012	0.01905
McAllister	0.0209719	3	0.00635	998	864	0.00106	0.000585	0.034	0.003175	0.39	0.0508	0.073025	4	1	2	0.393138	0.01905
McAllister	0.0161798	3	0.01905	998	864	0.00106	0.000585	0.034	0.003175	0.39	0.0508	0.073025	4	1	2	2.13793	0.05715
McAllister	0.0186775	3	0.01905	998	864	0.00106	0.000585	0.034	0.003175	0.39	0.0508	0.073025	4	1	2	1.96107	0.05715
McAllister	0.0133181	3	0.01905	998	864	0.00106	0.000585	0.034	0.003175	0.39	0.0508	0.073025	4	1	2	0.899758	0.05715
McAllister	0.0167725	3	0.01905	998	864	0.00106	0.000585	0.034	0.003175	0.39	0.0508	0.073025	4	1	2	1.16266	0.05715
McAllister	0.0134197	3	0.01905	998	864	0.00106	0.000585	0.034	0.003175	0.39	0.0508	0.073025	4	1	2	0.528447	0.05715
McAllister	0.0156125	3	0.01905	998	864	0.00106	0.000585	0.034	0.003175	0.39	0.0508	0.073025	4	1	2	0.761223	0.05715
McAllister	0.0153501	3	0.01905	998	864	0.00106	0.000585	0.034	0.003175	0.39	0.0508	0.073025	4	1	2	0.52225	0.05715
McAllister	0.0144865	3	0.01905	998	864	0.00106	0.000585	0.034	0.003175	0.39	0.0508	0.073025	4	1	2	0.333593	0.05715
McAllister	0.0153162	3	0.01905	998	864	0.00106	0.000585	0.034	0.003175	0.39	0.0508	0.073025	4	1	2	0.322368	0.05715
McAllister	0.0155025	3	0.01905	998	864	0.00106	0.000585	0.034	0.003175	0.39	0.0508	0.073025	4	1	2	0.214191	0.05715
McAllister	0.0157395	3	0.01905	998	864	0.00106	0.000585	0.034	0.003175	0.39	0.0508	0.073025	4	1	2	0.225445	0.05715
McAllister	0.0121581	4	0.006096	998	864	0.00106	0.000585	0.034	0.003175	0.39	0.0508	0.073025	4	1	2	1.25786	0.024384
McAllister	0.0127931	4	0.006096	998	864	0.00106	0.000585	0.034	0.003175	0.39	0.0508	0.073025	4	1	2	0.78184	0.024384
McAllister	0.0158835	4	0.006096	998	864	0.00106	0.000585	0.034	0.003175	0.39	0.0508	0.073025	4	1	2	0.795215	0.024384
McAllister	0.0136652	4	0.006096	998	864	0.00106	0.000585	0.034	0.003175	0.39	0.0508	0.073025	4	1	2	0.544498	0.024384
McAllister	0.0148167	4	0.006096	998	864	0.00106	0.000585	0.034	0.003175	0.39	0.0508	0.073025	4	1	2	0.369327	0.024384
McAllister	0.0169672	3	0.00635	998	864	0.00106	0.000585	0.034	0.003175	0.621	0.0508	0.073025	4	1	2	1.43204	0.01905
McAllister	0.0170603	3	0.00635	998	864	0.00106	0.000585	0.034	0.003175	0.621	0.0508	0.073025	4	1	2	0.960117	0.01905
McAllister	0.0177461	3	0.00635	998	864	0.00106	0.000585	0.034	0.003175	0.621	0.0508	0.073025	4	1	2	0.650394	0.01905
McAllister	0.0188807	3	0.00635	998	864	0.00106	0.000585	0.034	0.003175	0.621	0.0508	0.073025	4	1	2	0.39375	0.01905
McAllister	0.0147828	3.5	0.0127	998	864	0.00106	0.000585	0.034	0.003175	0.621	0.0508	0.073025	4	1	2	0.373721	0.04445
McAllister	0.0151215	3.5	0.0127	998	864	0.00106	0.000585	0.034	0.003175	0.621	0.0508	0.073025	4	1	2	0.397496	0.04445
McAllister	0.0148844	3.5	0.0127	998	864	0.00106	0.000585	0.034	0.003175	0.621	0.0508	0.073025	4	1	2	0.277616	0.04445
McAllister	0.0153247	3.5	0.0127	998	864	0.00106	0.000585	0.034	0.003175	0.621	0.0508	0.073025	4	1	2	0.214765	0.04445
McAllister	0.0174752	3.5	0.0127	998	864	0.00106	0.000585	0.034	0.003175	0.621	0.0508	0.073025	4	1	2	0.164129	0.04445
McAllister	0.0139615	3	0.00635	998	881	0.00106	0.000748	0.0142	0.003175	0.246	0.0508	0.073025	4	1	2	1.71217	0.01905
McAllister	0.014478	3	0.00635	998	881	0.00106	0.000748	0.0142	0.003175	0.246	0.0508	0.073025	4	1	2	1.02847	0.01905
McAllister	0.0151045	3	0.00635	998	881	0.00106	0.000748	0.0142	0.003175	0.246	0.0508	0.073025	4	1	2	0.679849	0.01905
McAllister	0.0159089	3	0.00635	998	881	0.00106	0.000748	0.0142	0.003175	0.246	0.0508	0.073025	4	1	2	0.455461	0.01905
McAllister	0.0173228	3	0.00635	998	881	0.00106	0.000748	0.0142	0.003175	0.246	0.0508	0.073025	4	1	2	0.31238	0.01905
McAllister	0.0101092	3	0.0127	998	881	0.00106	0.000748	0.0142	0.003175	0.246	0.0508	0.073025	4	1	2	4.45205	0.0381
McAllister	0.00850053	3	0.0127	998	881	0.00106	0.000748	0.0142	0.003175	0.246	0.0508	0.073025	4	1	2	1.42512	0.0381
McAllister	0.00801793	3	0.0127	997	831	0.00106	0.000748	0.0142	0.003175	0.246	0.0508	0.073025	4	1	2	0.547386	0.0381
McAllister	0.0087376	3	0.0127	997	881	0.00106	0.000748	0.0142	0.003175	0.246	0.0508	0.073025	4	1	2	0.247884	0.0381
McAllister	0.016256	2	0.00635	997	881	0.00106	0.000748	0.0142	0.003175	0.246	0.0508	0.073025	4	1	2	2.14754	0.0127
McAllister	0.0169164	2	0.00635	997	881	0.00106	0.000748	0.0142	0.003175	0.246	0.0508	0.073025	4	1	2	1.41596	0.0127
McAllister	0.0174498	2	0.00635	997	881	0.00106	0.000748	0.0142	0.003175	0.246	0.0508	0.073025	4	1	2	0.93703	0.0127
McAllister	0.0181525	2	0.00635	997	881	0.00106	0.000748	0.0142	0.003175	0.246	0.0508	0.073025	4	1	2	0.655598	0.0127
McAllister	0.0195749	3	0.00635	997	881	0.00106	0.000748	0.0142	0.003175	0.246	0.0508	0.073025	4	1	2	0.500324	0.01905
McAllister	0.0193887	3	0.00635	996	805	0.00106	0.000614	0.0101	0.003175	0.246	0.0508	0.073025	4	1	2	1.72944	0.01905
McAllister	0.0193633	3	0.00635	996	805	0.00106	0.000614	0.0101	0.003175	0.246	0.0508	0.073025	4	1	2	1.18642	0.01905
McAllister	0.0201591	3	0.00635	996	805	0.00106	0.000614	0.0101	0.003175	0.246	0.0508	0.073025	4	1	2	0.852918	0.01905
McAllister	0.0216069	3	0.00635	996	805	0.00106	0.000614	0.0101	0.003175	0.246	0.0508	0.073025	4	1	2	0.428891	0.01905
McAllister	0.0174583	3	0.009398	996	805	0.00106	0.000614	0.0101	0.003175	0.246	0.0508	0.073025	4	1	2	1.51463	0.028194
McAllister	0.0183303	3	0.009398	996	805	0.00106	0.000614	0.0101	0.003175	0.246	0.0508	0.073025	4	1	2	1.08173	0.028194
McAllister	0.0182541	3	0.009398	996	805	0.00106	0.000614	0.0101	0.003175	0.246	0.0508	0.073025	4	1	2	0.668731	0.028194
McAllister	0.0189399	3	0.009398	996	805	0.00106	0.000614	0.0101	0.003175	0.246	0.0508	0.073025	4	1	2	0.45923	0.028194
McAllister	0.0199051	3	0.009398	996	805	0.00106	0.000614	0.0101	0.003175	0.246	0.0508	0.073025	4	1	2	0.324507	0.028194
McAllister	0.0154771	3	0.0127	996	805	0.00106	0.000614	0.0101	0.003175	0.246	0.0508	0.073025	4	1	2	3.42615	0.0381
McAllister	0.0147828	3	0.0127	996	805	0.00106	0.000614	0.0101	0.003175	0.246	0.0508	0.073025	4	1	2	1.84365	0.0381
McAllister	0.0146981	3	0.0127	996	805	0.00106	0.000614	0.0101	0.003175	0.246	0.0508	0.073025	4	1	2	1.08905	0.0381
McAllister	0.0150961	3	0.0127	996	805	0.00106	0.000614	0.0101	0.003175	0.246	0.0508	0.073025	4	1	2	0.672608	0.0381
McAllister	0.0151977	3	0.0127	996	805	0.00106	0.000614	0.0101	0.003175	0.246	0.0508	0.073025	4	1	2	0.382897	0.0381
McAllister	0.0156464	3	0.0127	996	805	0.00106	0.000614	0.0101	0.003175	0.246	0.0508	0.073025	4	1	2	0.420446	0.0381
McAllister	0.0193887	3.5	0.00635	996	805	0.00106	0.000614	0.0101	0.003175	0.246	0.0508	0.073025	4	1	2	1.7724	0.022225
McAllister	0.0187029	3.5	0.00635	996	805	0.00106	0.000614	0.0101	0.003175	0.246	0.0508	0.073025	4	1	2	1.13843	0.022225
McAllister	0.0191093	3.5	0.00635	996	805	0.00106	0.000614	0.0101	0.003175	0.246	0.0508	0.073025	4	1	2	0.75642	0.022225
McAllister	0.0199813	3.5	0.00635	996	805	0.00106	0.000614	0.0101	0.003175	0.246	0.0508	0.073025	4	1	2	0.543492	0.022225
McAllister	0.0199051	3.5	0.00635	996	805	0.00106	0.000614	0.0101	0.003175	0.246	0.0508	0.073025	4	1	2	0.320787	0.022225
McAllister	0.0198882	3	0.00635	998	691	0.00106	0.000486	0.04	0.003175	0.246	0.0508	0.073025	4	1	2	1.4117	0.01905
McAllister	0.0199983	3	0.00635	998	691	0.00106	0.000486	0.04	0.003175	0.246	0.0508	0.073025	4	1	2	1.23251	0.01905
McAllister	0.0209889	3	0.00635	998	691	0.00106	0.000486	0.04	0.003175	0.246	0.0508	0.073025	4	1	2	0.927683	0.01905
McAllister	0.0220049	3	0.00635	998	691	0.00106	0.000486	0.04	0.003175	0.246	0.0508	0.073025	4	1	2	0.71438	0.01905
McAllister	0.0237913	3	0.00635	998	691	0.00106	0.000486	0.04	0.003175	0.246	0.0508	0.073025	4	1	2	0.598407	0.01905
McAllister	0.0187537	3.5	0.00635	998	691	0.00106	0.000486	0.04	0.003175	0.246	0.0508	0.073025	4	1	2	1.31937	0.022225
McAllister	0.0187198	3.5	0.00635	998	691	0.00106	0.000486	0.04	0.003175	0.246	0.0508	0.073025	4	1	2	0.848662	0.022225
McAllister	0.0194225	3.5	0.00635	998	691	0.00106	0.000486	0.04	0.003175	0.246	0.0508	0.073025	4	1	2	0.767334	0.022225
McAllister	0.0205655	3.5	0.00635	998	691	0.00106	0.000486	0.04	0.003175	0.246	0.0508	0.073025	4	1	2	0.580351	0.022225
McAllister	0.0222165	3.5	0.00635	998	691	0.00106	0.000486	0.04	0.003175	0.246	0.0508	0.073025	4	1	2	0.47831	0.022225
McAllister	0.0149183	3	0.00635	998	905	0.00106	0.00049	0.0085	0.003175	0.246	0.0508	0.073025	4	1	2	3.405	0.01905
McAllister	0.0147235	3	0.00635	998	905	0.00106	0.00049	0.0085	0.003175	0.246	0.0508	0.073025	4	1	2	1.83225	0.01905
McAllister	0.0135805	3	0.00635	998	905	0.00106	0.00049	0.0085	0.003175	0.246	0.0508	0.073025	4	1	2	0.941889	0.01905
McAllister	0.0141647	3	0.00635	998	905	0.00106	0.00049	0.0085	0.003175	0.246	0.0508	0.073025	4	1	2	0.600957	0.01905
McAllister	0.0145711	3	0.00635	998	905	0.00106	0.00049	0.0085	0.003175	0.246	0.0508	0.073025	4	1	2	0.366958	0.01905
McAllister	0.0151977	3	0.00635	998	905	0.00106	0.00049	0.0085	0.003175	0.246	0.0508	0.073025	4	1	2	0.187169	0.01905
McAllister	0.00684107	3	0.0127	998	905	0.00106	0.00049	0.0085	0.003175	0.246	0.0508	0.073025	4	1	2	2.9803	0.0381
McAllister	0.0072898	3	0.0127	998	905	0.00106	0.00049	0.0085	0.003175	0.246	0.0508	0.073025	4	1	2	1.64923	0.0381
McAllister	0.00710353	3	0.0127	998	905	0.00106	0.00049	0.0085	0.003175	0.246	0.0508	0.073025	4	1	2	1.10804	0.0381
McAllister	0.0068072	3	0.0127	998	905	0.00106	0.00049	0.0085	0.003175	0.246	0.0508	0.073025	4	1	2	0.699789	0.0381
McAllister	0.00757767	3	0.0127	998	905	0.00106	0.00049	0.0085	0.003175	0.246	0.0508	0.073025	4	1	2	0.481788	0.0381
McAllister	0.0123698	3	0.00635	998	905	0.00106	0.00049	0.0085	0.003175	0.246	0.0762	0.073025	4	1	2	2.73657	0.01905
McAllister	0.0120819	3	0.00635	998	905	0.00106	0.00049	0.0085	0.003175	0.246	0.0762	0.073025	4	1	2	1.3943	0.01905
McAllister	0.0141055	3	0.00635	998	905	0.00106	0.00049	0.0085	0.003175	0.246	0.0762	0.073025	4	1	2	1.0799	0.01905
McAllister	0.0150961	3	0.00635	998	905	0.00106	0.00049	0.0085	0.003175	0.246	0.0762	0.073025	4	1	2	0.399529	0.01905
McAllister	0.0165354	3	0.00635	998	905	0.00106	0.00049	0.0085	0.003175	0.246	0.0762	0.073025	4	1	2	0.309859	0.01905
McAllister	0.0109474	3	0.0127	998	905	0.00106	0.00049	0.0085	0.003175	0.246	0.0762	0.073025	4	1	2	4.32099	0.0381
McAllister	0.0103124	3	0.0127	998	905	0.00106	0.00049	0.0085	0.003175	0.246	0.0762	0.073025	4	1	2	2.16364	0.0381
McAllister	0.00961813	3	0.0127	998	905	0.00106	0.00049	0.0085	0.003175	0.246	0.0762	0.073025	4	1	2	1.92784	0.0381
McAllister	0.0106172	3	0.0127	998	905	0.00106	0.00049	0.0085	0.003175	0.246	0.0762	0.073025	4	1	2	1.09349	0.0381
McAllister	0.0114639	3	0.0127	998	905	0.00106	0.00049	0.0085	0.003175	0.246	0.0762	0.073025	4	1	2	0.667488	0.0381
McAllister	0.0150622	3	0.0127	998	905	0.00106	0.00049	0.0085	0.003175	0.245	0.0762	0.073025	4	1	2	0.434677	0.0381
McAllister	0.0127762	3	0.00635	998	864	0.001002	0.000585	0.034	0.003175	0.25	0.0508	0.15875	4	1	1	0.972549	0.01905
McAllister	0.0115316	3	0.00635	998	864	0.001002	0.000585	0.034	0.003175	0.25	0.0508	0.15875	4	1	1	1.6811	0.01905
McAllister	0.0136567	3	0.00635	998	864	0.001002	0.000585	0.034	0.003175	0.25	0.0508	0.15875	4	1	1	0.760917	0.01905
McAllister	0.0148421	3	0.00635	998	864	0.001002	0.000585	0.034	0.003175	0.25	0.0508	0.15875	4	1	1	0.579279	0.01905
McAllister	0.0157649	3	0.00635	998	864	0.001002	0.000585	0.034	0.003175	0.25	0.0508	0.15875	4	1	1	0.466142	0.01905
McAllister	0.0167979	3	0.00635	998	864	0.001002	0.000585	0.034	0.003175	0.25	0.0508	0.15875	4	1	1	0.376822	0.01905
McAllister	0.0112522	3	0.00635	998	864	0.001002	0.000585	0.034	0.003175	0.25	0.0508	0.15875	4	1	1	2.13443	0.01905
McAllister	0.0182203	3	0.00635	998	864	0.001002	0.000585	0.034	0.003175	0.25	0.0508	0.15875	4	1	1	0.267373	0.01905
McAllister	0.0203793	3	0.00635	998	864	0.001002	0.000585	0.034	0.003175	0.25	0.0508	0.15875	4	1	1	0.116937	0.01905
McAllister	0.0128693	3	0.00635	998	864	0.001002	0.000585	0.034	0.003175	0.25	0.0508	0.15875	4	1	1	1.02128	0.01905
McAllister	0.0143933	3	0.00635	998	864	0.001002	0.000585	0.034	0.003175	0.25	0.0508	0.15875	4	1	1	0.575533	0.01905
McAllister	0.0155956	3	0.00635	998	864	0.001002	0.000585	0.034	0.003175	0.25	0.0508	0.15875	4	1	1	0.35941	0.01905
McAllister	0.0182118	3	0.00635	998	864	0.001002	0.000585	0.034	0.003175	0.25	0.0508	0.15875	4	1	1	0.201676	0.01905
McAllister	0.019812	3	0.00635	998	864	0.001002	0.000585	0.034	0.003175	0.25	0.0508	0.15875	4	1	1	0.0858469	0.01905
McAllister	0.0143933	3	0.007874	998	864	0.001002	0.000585	0.034	0.003175	0.25	0.0508	0.15875	4	1	1	0.575533	0.023622
McAllister	0.0154601	3	0.007874	998	864	0.001002	0.000585	0.034	0.003175	0.25	0.0508	0.15875	4	1	1	0.449206	0.023622
McAllister	0.016002	3	0.007874	998	864	0.001002	0.000585	0.034	0.003175	0.25	0.0508	0.15875	4	1	1	0.384615	0.023622
McAllister	0.0188383	3	0.007874	998	864	0.001002	0.000585	0.034	0.003175	0.25	0.0508	0.15875	4	1	1	0.243017	0.023622
McAllister	0.0211582	3	0.007874	998	864	0.001002	0.000585	0.034	0.003175	0.25	0.0508	0.15875	4	1	1	0.159629	0.023622
McAllister	0.0124206	2	0.00635	998	864	0.001002	0.000585	0.034	0.003175	0.25	0.0508	0.15875	4	1	1	0.950798	0.0127
McAllister	0.014478	2	0.00635	998	864	0.001002	0.000585	0.034	0.003175	0.25	0.0508	0.15875	4	1	1	0.583333	0.0127
McAllister	0.0151977	2	0.00635	998	864	0.001002	0.000585	0.034	0.003175	0.25	0.0508	0.15875	4	1	1	0.310219	0.0127
McAllister	0.0173059	2	0.00635	998	864	0.001002	0.000585	0.034	0.003175	0.25	0.0508	0.15875	4	1	1	0.141899	0.0127
McAllister	0.0194564	2	0.00635	998	864	0.001002	0.000585	0.034	0.003175	0.25	0.0508	0.15875	4	1	1	0.0663573	0.0127
McAllister	0.0109135	2	0.00635	998	864	0.001002	0.000585	0.034	0.003175	0.25	0.0508	0.15875	4	1	1	1.51758	0.0127
McAllister	0.011049	2	0.00635	998	864	0.001002	0.000585	0.034	0.003175	0.25	0.0508	0.15875	4	1	1	1.21186	0.0127
McAllister	0.011684	2.5	0.00635	998	864	0.001002	0.000585	0.034	0.003175	0.25	0.0508	0.15875	4	1	1	2.13636	0.015875
McAllister	0.0119126	2.5	0.00635	998	864	0.001002	0.000585	0.034	0.003175	0.25	0.0508	0.15875	4	1	1	1.11579	0.015875
McAllister	0.0130387	2.5	0.00635	998	864	0.001002	0.000585	0.034	0.003175	0.25	0.0508	0.15875	4	1	1	0.937107	0.015875
McAllister	0.014859	2.5	0.00635	998	864	0.001002	0.000585	0.034	0.003175	0.25	0.0508	0.15875	4	1	1	0.539474	0.015875
McAllister	0.016256	2.5	0.00635	998	854	0.001002	0.000585	0.034	0.003175	0.25	0.0508	0.15875	4	1	1	0.333333	0.015875
McAllister	0.0165947	2.5	0.00635	998	864	0.001002	0.000585	0.034	0.003175	0.25	0.0508	0.15875	4	1	1	0.306667	0.015875
McAllister	0.0175683	2.5	0.00635	998	864	0.001002	0.000585	0.034	0.003175	0.25	0.0508	0.15875	4	1	1	0.235119	0.015875
McAllister	0.021463	2.5	0.00635	998	864	0.001002	0.000585	0.034	0.003175	0.25	0.0508	0.15875	4	1	1	0.121681	0.015875
McAllister	0.0125899	3.5	0.00635	998	864	0.001002	0.000585	0.034	0.003175	0.25	0.0508	0.15875	4	1	1	0.977394	0.022225
McAllister	0.0139446	3.5	0.00635	998	864	0.001002	0.000585	0.034	0.003175	0.25	0.0508	0.15875	4	1	1	0.525	0.022225
McAllister	0.0179324	3.5	0.00635	998	864	0.001002	0.000585	0.034	0.003175	0.25	0.0508	0.15875	4	1	1	0.275904	0.022225
McAllister	0.0208534	3.5	0.00635	998	864	0.001002	0.000585	0.034	0.003175	0.25	0.0508	0.15875	4	1	1	0.124658	0.022225
McAllister	0.0122343	3.5	0.00635	998	864	0.001002	0.000585	0.034	0.003175	0.25	0.0508	0.15875	4	1	1	0.921543	0.022225
McAllister	0.0139277	3.5	0.00635	998	864	0.001002	0.000585	0.034	0.003175	0.25	0.0508	0.15875	4	1	1	0.523148	0.022225
McAllister	0.0155363	3.5	0.00635	998	864	0.001002	0.000585	0.034	0.003175	0.25	0.0508	0.15875	4	1	1	0.339416	0.022225
McAllister	0.0185335	3.5	0.00635	998	864	0.001002	0.000585	0.034	0.003175	0.25	0.0508	0.15875	4	1	1	0.222905	0.022225
McAllister	0.0203539	3.5	0.00635	998	864	0.001002	0.000585	0.034	0.003175	0.25	0.0508	0.15875	4	1	1	0.11814	0.022225
McAllister	0.0113707	3.5	0.00635	998	864	0.001002	0.000585	0.034	0.003175	0.25	0.0508	0.15875	4	1	1	1.61793	0.022225
McAllister	0.0222673	3.5	0.00635	998	864	0.001002	0.000585	0.034	0.003175	0.25	0.0508	0.15875	4	1	1	0.0647773	0.022225
McAllister	0.0130217	3	0.005588	998	772	0.001002	0.000926	0.0363	0.003175	0.25	0.0508	0.3048	4	1	2	1.52545	0.016764
McAllister	0.0149945	3	0.005588	998	772	0.001002	0.000926	0.0363	0.003175	0.25	0.0508	0.3048	4	1	2	0.967778	0.016764
McAllister	0.0158919	3	0.005588	998	772	0.001002	0.000926	0.0363	0.003175	0.25	0.0508	0.3048	4	1	2	0.787619	0.016764
McAllister	0.0140123	3	0.005588	998	772	0.001002	0.000926	0.0363	0.003175	0.25	0.0508	0.3048	4	1	2	1.19205	0.016764
McAllister	0.0122851	3	0.005588	998	772	0.001002	0.000926	0.0353	0.003175	0.25	0.0508	0.3048	4	1	2	2.02923	0.016764
McAllister	0.0127762	3	0.005588	998	772	0.001002	0.000926	0.0363	0.003175	0.25	0.0508	0.3048	4	1	2	3.73041	0.016764
McAllister	0.0149691	3	0.0122936	998	772	0.001002	0.000926	0.0363	0.003175	0.25	0.0508	0.3048	4	1	2	0.473333	0.0368808
McAllister	0.0139277	3	0.0122936	998	772	0.001002	0.000926	0.0363	0.003175	0.25	0.0508	0.3048	4	1	2	0.597087	0.0368808
McAllister	0.0133858	3	0.0122936	998	772	0.001002	0.000926	0.0363	0.003175	0.25	0.0508	0.3048	4	1	2	0.786441	0.0368808
McAllister	0.0128863	3	0.0122936	998	772	0.001002	0.000926	0.0363	0.003175	0.25	0.0508	0.3048	4	1	2	1.05954	0.0368808
McAllister	0.0124206	3	0.0122936	998	772	0.001002	0.000926	0.0353	0.003175	0.25	0.0508	0.3048	4	1	2	1.40887	0.0368808
McAllister	0.0115401	3	0.0122936	998	772	0.001002	0.000926	0.0363	0.003175	0.25	0.0508	0.3048	4	1	2	1.9375	0.0368808
McAllister	0.0108543	3	0.0122936	998	772	0.001002	0.000926	0.0363	0.003175	0.25	0.0508	0.3048	4	1	2	2.94462	0.0368808
McAllister	0.0101346	3	0.0122936	998	772	0.001002	0.000926	0.0363	0.003175	0.25	0.0508	0.3048	4	1	2	6.125	0.0368808
McAllister	0.0116925	3	0.0122936	998	772	0.001002	0.000926	0.0363	0.003175	0.25	0.0508	0.3048	4	1	2	1.61553	0.0368808
McAllister	0.0146812	3	0.0122936	998	772	0.001002	0.000926	0.0363	0.003175	0.25	0.0508	0.3048	4	1	2	0.573503	0.0368808
McAllister	0.0136737	3	0.0122936	998	772	0.001002	0.000926	0.0363	0.003175	0.25	0.0508	0.3048	4	1	2	0.677051	0.0368808
McAllister	0.0138345	3	0.0132588	998	772	0.001002	0.000926	0.0353	0.003175	0.25	0.0508	0.3048	4	1	2	0.586408	0.0397764
McAllister	0.0128778	3	0.0132588	998	772	0.001002	0.000926	0.0363	0.003175	0.25	0.0508	0.3048	4	1	2	0.69	0.0397764
McAllister	0.012192	3	0.0132588	998	772	0.001002	0.000926	0.0363	0.003175	0.25	0.0508	0.3048	4	1	2	0.907285	0.0397764
McAllister	0.0114723	3	0.0132588	998	772	0.001002	0.000926	0.0363	0.003175	0.25	0.0508	0.3048	4	1	2	1.27731	0.0397764
McAllister	0.0107611	3	0.0132588	998	772	0.001002	0.000926	0.0363	0.003175	0.25	0.0508	0.3048	4	1	2	1.73922	0.0397764
McAllister	0.0136821	3	0.014224	998	772	0.001002	0.000926	0.0363	0.003175	0.25	0.0508	0.3048	4	1	2	0.568932	0.042672
McAllister	0.0127762	3	0.014224	998	772	0.001002	0.000926	0.0363	0.003175	0.25	0.0508	0.3048	4	1	2	0.676667	0.042672
McAllister	0.0119465	3	0.014224	998	772	0.001002	0.000926	0.0353	0.003175	0.25	0.0508	0.3048	4	1	2	0.899058	0.042672
McAllister	0.0112945	3	0.014224	998	772	0.001002	0.000926	0.0363	0.003175	0.25	0.0508	0.3048	4	1	2	1.19048	0.042672
McAllister	0.0103632	3	0.014224	998	772	0.001002	0.000926	0.0363	0.003175	0.25	0.0508	0.3048	4	1	2	1.63793	0.042672
McAllister	0.0104055	3	0.014224	998	772	0.001002	0.000926	0.0363	0.003175	0.25	0.0508	0.3048	4	1	2	2.85266	0.042672
McAllister	0.0150283	2	0.01651	998	772	0.001002	0.000926	0.0363	0.003175	0.25	0.0508	0.3048	4	1	2	0.972222	0.03302
McAllister	0.015367	2	0.01651	998	772	0.001002	0.000926	0.0363	0.003175	0.25	0.0508	0.3048	4	1	2	0.762136	0.03302
McAllister	0.0159766	2	0.01651	998	772	0.001002	0.000926	0.0363	0.003175	0.25	0.0508	0.3048	4	1	2	0.585714	0.03302
McAllister	0.0163407	2	0.01651	998	772	0.001002	0.000926	0.0363	0.003175	0.25	0.0508	0.3048	4	1	2	0.507812	0.03302
McAllister	0.0141393	2	0.01651	998	772	0.001002	0.000926	0.0363	0.003175	0.25	0.0508	0.3048	4	1	2	1.21192	0.03302
McAllister	0.0137753	2	0.01651	998	772	0.001002	0.000926	0.0363	0.003175	0.25	0.0508	0.3048	4	1	2	1.07261	0.03302
McAllister	0.0151384	2	0.01651	998	772	0.001002	0.000926	0.0363	0.003175	0.25	0.0508	0.3048	4	1	2	0.866388	0.03302
McAllister	0.0144526	3	0.006096	998	864	0.001002	0.000585	0.034	0.003175	0.25	0.0508	0.3048	4	1	2	0.471552	0.018288
McAllister	0.0139107	3	0.006096	998	864	0.001002	0.000585	0.034	0.003175	0.25	0.0508	0.3048	4	1	2	0.610784	0.018288
McAllister	0.0129625	3	0.006096	998	864	0.001002	0.000585	0.034	0.003175	0.25	0.0508	0.3048	4	1	2	0.753723	0.018288
McAllister	0.0135467	3	0.006096	998	864	0.001002	0.000585	0.034	0.003175	0.25	0.0508	0.3048	4	1	2	0.832761	0.018288
McAllister	0.0124883	3	0.006096	998	864	0.001002	0.000585	0.034	0.003175	0.25	0.0508	0.3048	4	1	2	0.987871	0.018288
McAllister	0.0115993	3	0.006096	998	864	0.001002	0.000585	0.034	0.003175	0.25	0.0508	0.3048	4	1	2	1.29866	0.018288
McAllister	0.0107696	3	0.006096	998	864	0.001002	0.000585	0.034	0.003175	0.25	0.0508	0.3048	4	1	2	1.8204	0.018288
McAllister	0.0101431	3	0.006477	998	864	0.001002	0.000585	0.034	0.003175	0.25	0.0508	0.3048	4	1	2	2.57612	0.019431
McAllister	0.0128693	3	0.006477	998	864	0.001002	0.000585	0.034	0.003175	0.25	0.0508	0.3048	4	1	2	0.490196	0.019431
McAllister	0.0120142	3	0.006477	998	864	0.001002	0.000585	0.034	0.003175	0.25	0.0508	0.3048	4	1	2	0.62543	0.019431
McAllister	0.0120481	3	0.006477	998	864	0.001002	0.000585	0.034	0.003175	0.25	0.0508	0.3048	4	1	2	0.630011	0.019431
McAllister	0.0115485	3	0.006477	998	864	0.001002	0.000585	0.034	0.003175	0.25	0.0508	0.3048	4	1	2	0.838275	0.019431
McAllister	0.0105241	3	0.006477	998	864	0.001002	0.000585	0.034	0.003175	0.25	0.0508	0.3048	4	1	2	1.08208	0.019431
McAllister	0.0099568	3	0.006477	998	864	0.001002	0.000585	0.034	0.003175	0.25	0.0508	0.3048	4	1	2	1.52361	0.019431
McAllister	0.00956733	3	0.006477	998	864	0.001002	0.000585	0.034	0.003175	0.25	0.0508	0.3048	4	1	2	2.37313	0.019431
McAllister	0.010541	3	0.009398	998	864	0.001002	0.000585	0.034	0.003175	0.25	0.0508	0.3048	4	1	2	0.426117	0.028194
McAllister	0.0098806	3	0.009398	998	864	0.001002	0.000585	0.034	0.003175	0.25	0.0508	0.3048	4	1	2	0.572776	0.028194
McAllister	0.0090932	3	0.009398	998	864	0.001002	0.000585	0.034	0.003175	0.25	0.0508	0.3048	4	1	2	0.798995	0.028194
McAllister	0.00857673	3	0.009398	998	864	0.001002	0.000585	0.034	0.003175	0.25	0.0508	0.3048	4	1	2	1.17382	0.028194
McAllister	0.00784013	3	0.009398	998	864	0.001002	0.000585	0.034	0.003175	0.25	0.0508	0.3048	4	1	2	1.76418	0.028194
McAllister	0.0071882	3	0.009398	998	864	0.001002	0.000585	0.034	0.003175	0.25	0.0508	0.3048	4	1	2	2.8945	0.028194
McAllister	0.0098806	3	0.012192	998	864	0.001002	0.000585	0.034	0.003175	0.25	0.0508	0.3048	4	1	2	0.33677	0.036576
McAllister	0.0089916	3	0.012192	998	864	0.001002	0.000585	0.034	0.003175	0.25	0.0508	0.3048	4	1	2	0.431267	0.036576
McAllister	0.00798407	3	0.012192	998	864	0.001002	0.000585	0.034	0.003175	0.25	0.0508	0.3048	4	1	2	0.579564	0.036576
McAllister	0.00712047	3	0.012192	998	864	0.001002	0.000585	0.034	0.003175	0.25	0.0508	0.3048	4	1	2	0.804721	0.036576
McAllister	0.00833967	3	0.012192	998	864	0.001002	0.000585	0.034	0.003175	0.25	0.0508	0.3048	4	1	2	1.9403	0.036576
McAllister	0.00959273	3	0.012192	998	864	0.001002	0.000585	0.034	0.003175	0.25	0.0508	0.3048	4	1	2	4.19725	0.036576
McAllister	0.0157649	3	0.013208	998	864	0.001002	0.000585	0.034	0.003175	0.25	0.0508	0.3048	4	1	2	0.82549	0.039624
McAllister	0.0144187	3	0.013208	998	864	0.001002	0.000585	0.034	0.003175	0.25	0.0508	0.3048	4	1	2	0.950745	0.039624
McAllister	0.0109135	3	0.013208	998	864	0.001002	0.000585	0.034	0.003175	0.25	0.0508	0.3048	4	1	2	0.737197	0.039624
McAllister	0.00776393	3	0.013208	998	864	0.001002	0.000585	0.034	0.003175	0.25	0.0508	0.3048	4	1	2	0.536013	0.039624
McAllister	0.00710353	3	0.013208	998	864	0.001002	0.000585	0.034	0.003175	0.25	0.0508	0.3048	4	1	2	0.800429	0.039624
McAllister	0.0059182	3	0.015494	998	864	0.001002	0.000585	0.034	0.003175	0.25	0.0508	0.3048	4	1	2	0.5	0.046482
McAllister	0.00527473	3	0.015494	998	864	0.001002	0.000585	0.034	0.003175	0.25	0.0508	0.3048	4	1	2	0.859701	0.046482
McAllister	0.004953	3	0.015494	998	864	0.001002	0.000585	0.034	0.003175	0.25	0.0508	0.3048	4	1	2	1.68349	0.046482
McAllister	0.0050546	3	0.015494	998	864	0.001002	0.000585	0.034	0.003175	0.25	0.0508	0.3048	4	1	2	2.59639	0.046482
McAllister	0.00508	3	0.015494	998	864	0.001002	0.000585	0.034	0.003175	0.25	0.0508	0.3048	4	1	2	3.28571	0.046482
McAllister	0.0145881	2.5	0.006096	998	864	0.001002	0.000585	0.034	0.003175	0.25	0.0508	0.3048	4	1	2	0.511404	0.01524
McAllister	0.0134281	2.5	0.006096	998	864	0.001002	0.000585	0.034	0.003175	0.25	0.0508	0.3048	4	1	2	0.676533	0.01524
McAllister	0.0145796	2.5	0.006096	998	864	0.001002	0.000585	0.034	0.003175	0.25	0.0508	0.3048	4	1	2	0.609346	0.01524
McAllister	0.0130048	2.5	0.006096	998	864	0.001002	0.000585	0.034	0.003175	0.25	0.0508	0.3048	4	1	2	0.75945	0.01524
McAllister	0.0124375	2.5	0.006096	998	864	0.001002	0.000585	0.034	0.003175	0.25	0.0508	0.3048	4	1	2	0.979784	0.01524
McAllister	0.0114046	2.5	0.006096	998	864	0.001002	0.000585	0.034	0.003175	0.25	0.0508	0.3048	4	1	2	1.50372	0.01524
McAllister	0.0121497	2.5	0.006096	998	864	0.001002	0.000585	0.034	0.003175	0.25	0.0508	0.3048	4	1	2	1.40369	0.01524
McAllister	0.0111591	2.5	0.006096	998	864	0.001002	0.000585	0.034	0.003175	0.25	0.0508	0.3048	4	1	2	1.78059	0.01524
McAllister	0.0115316	2.5	0.006096	998	864	0.001002	0.000585	0.034	0.003175	0.25	0.0508	0.3048	4	1	2	1.8375	0.01524
McAllister	0.0136483	4	0.006096	998	864	0.001002	0.000585	0.034	0.003175	0.25	0.0508	0.3048	4	1	2	0.38488	0.024384
McAllister	0.0125561	4	0.006096	998	864	0.001002	0.000585	0.034	0.003175	0.25	0.0508	0.3048	4	1	2	0.453922	0.024384
McAllister	0.0114046	4	0.006096	998	864	0.001002	0.000585	0.034	0.003175	0.25	0.0508	0.3048	4	1	2	0.542955	0.024384
McAllister	0.0109389	4	0.006096	998	864	0.001002	0.000585	0.034	0.003175	0.25	0.0508	0.3048	4	1	2	0.74124	0.024384
McAllister	0.010033	4	0.006096	998	864	0.001002	0.000585	0.034	0.003175	0.25	0.0508	0.3048	4	1	2	0.984925	0.024384
McAllister	0.00897467	4	0.006096	998	864	0.001002	0.000585	0.034	0.003175	0.25	0.0508	0.3048	4	1	2	2.16418	0.024384
McAllister	0.0042418	0.413333	0.006096	997	872	0.000866	0.000587	0.0346	0.003175	0.21	0.0508	0.048768	4	1	1	0.407303	0.00251968
McAllister	0.00443653	0.416667	0.006096	997	873	0.000874	0.000599	0.0347	0.003175	0.21	0.0508	0.048768	4	1	1	0.404826	0.00254
McAllister	0.013208	0.408333	0.04191	996	871	0.000853	0.000583	0.0346	0.003175	0.21	0.0508	0.048768	4	1	1	0.399103	0.0171132
McAllister	0.0133435	0.413333	0.04191	997	875	0.000914	0.000613	0.0348	0.003175	0.21	0.0508	0.048768	4	1	1	0.400889	0.0173228
McAllister	0.0101092	1.255	0.006096	997	875	0.000914	0.000611	0.0348	0.003175	0.21	0.0508	0.048768	4	1	1	0.399766	0.00765048
McAllister	0.00987213	1.25667	0.006096	998	878	0.00096	0.000636	0.0349	0.003175	0.21	0.0508	0.048768	4	1	1	0.404819	0.00766064
McAllister	0.0023622	1.25333	0.04191	997	875	0.000916	0.000613	0.0348	0.003175	0.21	0.0508	0.048768	4	1	1	0.40201	0.0525272
McAllister	0.00234527	1.27167	0.04191	997	874	0.000895	0.000607	0.0347	0.003175	0.21	0.0508	0.048768	4	1	1	0.406091	0.0532955
McAllister	0.00381	0.408333	0.006096	997	874	0.000908	0.000609	0.0348	0.003175	0.21	0.0508	0.048768	4	1	1	2.43511	0.0024892
McAllister	0.00362373	0.418333	0.006096	998	877	0.000969	0.000632	0.0349	0.003175	0.21	0.0508	0.048768	4	1	1	2.5082	0.00255016
McAllister	0.00822113	0.413333	0.04191	996	872	0.00086	0.000587	0.0346	0.003175	0.21	0.0508	0.048768	4	1	1	2.46786	0.0173228
McAllister	0.00814493	0.411667	0.04191	996	871	0.000836	0.000576	0.0345	0.003175	0.21	0.0508	0.048768	4	1	1	2.48551	0.0172529
McAllister	0.00734907	1.25333	0.006096	997	873	0.000875	0.000594	0.0348	0.003175	0.21	0.0508	0.048768	4	1	1	2.5	0.00764032
McAllister	0.00724747	1.25667	0.006096	996	870	0.000829	0.000573	0.0345	0.003175	0.21	0.0508	0.048768	4	1	1	2.5082	0.00766064
McAllister	0.0022098	1.23833	0.04191	997	875	0.000914	0.000617	0.0348	0.003175	0.21	0.0508	0.048768	4	1	1	2.625	0.0518985
McAllister	0.0017018	1.25333	0.04191	996	870	0.000818	0.000571	0.0348	0.003175	0.21	0.0508	0.048768	4	1	1	2.40678	0.0525272
McAllister	0.0107527	0.845	0.016002	997	873	0.000874	0.000593	0.0348	0.003175	0.21	0.0508	0.048768	4	1	1	0.996855	0.0135217
McAllister	0.0107527	0.836667	0.016002	997	875	0.000921	0.000616	0.0348	0.003175	0.21	0.0508	0.048768	4	1	1	0.996855	0.0133883
McAllister	0.00762847	0.833333	0.007112	997	875	0.000916	0.000612	0.0348	0.003175	0.21	0.0508	0.048768	4	1	1	0.997783	0.00592667
McAllister	0.00796713	0.836667	0.007112	997	873	0.00088	0.000598	0.0348	0.003175	0.21	0.0508	0.048768	4	1	1	0.997877	0.00595037
McAllister	0.00544407	0.833333	0.036576	997	875	0.000914	0.000613	0.0348	0.003175	0.21	0.0508	0.048768	4	1	1	1.00312	0.03048
McAllister	0.00568113	0.833333	0.036576	996	871	0.000843	0.000581	0.0348	0.003175	0.21	0.0508	0.048768	4	1	1	0.997024	0.03048
McAllister	0.00946573	0.468333	0.016002	997	875	0.000912	0.000609	0.0349	0.003175	0.21	0.0508	0.048768	4	1	1	0.99287	0.00749427
McAllister	0.00953347	0.475	0.016002	996	871	0.000853	0.000584	0.0348	0.003175	0.21	0.0508	0.048768	4	1	1	1.00713	0.00760095
McAllister	0.00850053	1.19333	0.016002	997	875	0.000934	0.000618	0.0349	0.003175	0.21	0.0508	0.048768	4	1	1	1.00399	0.0190957
McAllister	0.00958427	1.2	0.016002	996	871	0.000831	0.000575	0.0345	0.003175	0.21	0.0508	0.048768	4	1	1	0.992958	0.0192024
McAllister	0.0136398	0.841667	0.016002	997	875	0.000912	0.000612	0.0348	0.003175	0.21	0.0508	0.048768	4	1	1	0.455285	0.0134683
McAllister	0.0140631	0.833333	0.016002	997	874	0.000892	0.000601	0.0347	0.003175	0.21	0.0508	0.048768	4	1	1	0.454466	0.013335
McAllister	0.00930487	0.833333	0.016002	996	869	0.000811	0.000568	0.0345	0.003175	0.21	0.0508	0.048768	4	1	1	2.16715	0.013335
McAllister	0.0092456	0.846667	0.016002	996	870	0.000832	0.000574	0.0345	0.003175	0.21	0.0508	0.048768	4	1	1	2.15607	0.0135484
McAllister	0.0027178	0.333333	0.00508	997	874	0.000914	0.000609	0.0348	0.003175	0.21	0.0508	0.048768	4	1	1	0.981481	0.00169333
McAllister	0.0028956	0.343333	0.00508	996	871	0.000847	0.000581	0.0346	0.003175	0.21	0.0508	0.048768	4	1	1	1	0.00174413
McAllister	0.007874	1.33333	0.00508	997	874	0.0009	0.000603	0.0347	0.003175	0.21	0.0508	0.048768	4	1	1	1.01299	0.00677333
McAllister	0.0078486	1.33333	0.00508	997	875	0.000914	0.000613	0.0348	0.003175	0.21	0.0508	0.048768	4	1	1	1.00216	0.00677333
McAllister	0.0070612	0.825	0.00508	996	871	0.000838	0.000575	0.0345	0.003175	0.21	0.0508	0.048768	4	1	1	0.3344	0.004191
McAllister	0.00681567	0.833333	0.00508	996	872	0.000853	0.000586	0.0346	0.003175	0.21	0.0508	0.048768	4	1	1	0.341667	0.00423333
McAllister	0.00547793	0.833333	0.00508	997	876	0.000929	0.000618	0.0348	0.003175	0.21	0.0508	0.048768	4	1	1	3.01863	0.00423333
McAllister	0.00552873	0.833333	0.00508	996	869	0.000815	0.000568	0.0345	0.003175	0.21	0.0508	0.048768	4	1	1	3.00613	0.00423333
McAllister	0.0108373	0.333333	0.050292	997	872	0.00087	0.000591	0.0346	0.003175	0.21	0.0508	0.048768	4	1	1	0.990669	0.016764
McAllister	0.00964353	0.331667	0.050292	997	875	0.000906	0.000609	0.0348	0.003175	0.21	0.0508	0.048768	4	1	1	1.00176	0.0166802
McAllister	0.00138007	1.33167	0.050292	995	871	0.000791	0.000579	0.0344	0.003175	0.21	0.0508	0.048768	4	1	1	0.987805	0.0669722
McAllister	0.001397	1.33833	0.050292	995	872	0.00084	0.000587	0.0346	0.003175	0.21	0.0508	0.048768	4	1	1	0.964286	0.0673075
McAllister	0.00447887	0.836667	0.050292	996	870	0.000832	0.000574	0.0345	0.003175	0.21	0.0508	0.048768	4	1	1	0.34264	0.0420776
McAllister	0.00369993	0.831667	0.050292	998	877	0.000951	0.000626	0.0341	0.003175	0.21	0.0508	0.048768	4	1	1	0.336391	0.0418262
McAllister	0.00277707	0.833333	0.050292	997	873	0.000885	0.0006	0.0347	0.003175	0.21	0.0508	0.048768	4	1	1	3	0.04191
McAllister	0.0021336	0.833333	0.050292	996	872	0.000851	0.000584	0.0346	0.003175	0.21	0.0508	0.048768	4	1	1	2.87692	0.04191
McAllister	0.00966893	0.333333	0.016002	997	873	0.000888	0.000594	0.0347	0.003175	0.21	0.0508	0.048768	4	1	1	0.334112	0.005334
McAllister	0.009652	0.333333	0.016002	997	873	0.000874	0.000594	0.0347	0.003175	0.21	0.0508	0.048768	4	1	1	0.3396	0.005334
McAllister	0.00761153	0.331667	0.016002	997	874	0.000902	0.000606	0.0347	0.003175	0.21	0.0508	0.048768	4	1	1	2.97788	0.00530733
McAllister	0.006858	0.388333	0.016002	997	873	0.000888	0.000599	0.0347	0.003175	0.21	0.0508	0.048768	4	1	1	2.97059	0.00621411
McAllister	0.0144187	1.33333	0.016002	996	871	0.000849	0.00058	0.0346	0.003175	0.21	0.0508	0.048768	4	1	1	0.337785	0.021336
McAllister	0.0113284	1.33333	0.016002	997	873	0.000886	0.000595	0.0347	0.003175	0.21	0.0508	0.048768	4	1	1	0.336663	0.021336
McAllister	0.0068834	1.33333	0.016002	997	875	0.000908	0.000609	0.0348	0.003175	0.21	0.0508	0.048768	4	1	1	2.98529	0.021336
McAllister	0.0068834	1.335	0.016002	997	873	0.000874	0.000594	0.0348	0.003175	0.21	0.0508	0.048768	4	1	1	3.02475	0.0213627
McAllister	0.0150707	0.75	0.0112014	1000	1454	0.000902	0.000591	0.0376	0.003175	0.21	0.0508	0.048768	4	1	1	0.575221	0.00840105
McAllister	0.01524	0.75	0.0112014	1000	1454	0.000902	0.000591	0.0376	0.003175	0.21	0.0508	0.048768	4	1	1	0.576182	0.00840105
McAllister	0.0267547	0.75	0.035433	1000	1454	0.000902	0.000591	0.0376	0.003175	0.21	0.0508	0.048768	4	1	1	0.576846	0.0265748
McAllister	0.0295487	0.75	0.035433	1000	1454	0.000902	0.000591	0.0376	0.003175	0.21	0.0508	0.048768	4	1	1	0.575621	0.0265748
McAllister	0.0296333	0.75	0.035433	1000	1454	0.000902	0.000591	0.0376	0.003175	0.21	0.0508	0.048768	4	1	1	0.575867	0.0265748
McAllister	0.0222673	1.25	0.0112014	1000	1454	0.000902	0.000591	0.0376	0.003175	0.21	0.0508	0.048768	4	1	1	0.57485	0.0140018
McAllister	0.0245533	1.25	0.0112014	1000	1454	0.000902	0.000591	0.0376	0.003175	0.21	0.0508	0.048768	4	1	1	0.576087	0.0140018
McAllister	0.0242147	1.25	0.0112014	1000	1454	0.000902	0.000591	0.0376	0.003175	0.21	0.0508	0.048768	4	1	1	0.57489	0.0140018
McAllister	0.0253153	1.25	0.035433	1000	1454	0.000902	0.000591	0.0376	0.003175	0.21	0.0508	0.048768	4	1	1	0.574513	0.0442912
McAllister	0.0254847	1.25	0.035433	1000	1454	0.000902	0.000591	0.0376	0.003175	0.21	0.0508	0.048768	4	1	1	0.575916	0.0442912
McAllister	0.014732	0.75	0.0112014	1000	1454	0.000902	0.000591	0.0376	0.003175	0.21	0.0508	0.048768	4	1	1	1.73155	0.00840105
McAllister	0.0164253	0.75	0.0112014	1000	1454	0.000902	0.000591	0.0376	0.003175	0.21	0.0508	0.048768	4	1	1	1.72855	0.00840105
McAllister	0.015748	0.75	0.0112014	1000	1454	0.000902	0.000591	0.0376	0.003175	0.21	0.0508	0.048768	4	1	1	1.73128	0.00840105
McAllister	0.0245533	0.75	0.035433	1000	1454	0.000902	0.000591	0.0376	0.003175	0.21	0.0508	0.048768	4	1	1	1.7307	0.0265748
McAllister	0.024384	0.75	0.035433	1000	1454	0.000902	0.000591	0.0376	0.003175	0.21	0.0508	0.048768	4	1	1	1.72986	0.0265748
McAllister	0.0192193	1.25	0.0112014	1000	1454	0.000902	0.000591	0.0376	0.003175	0.21	0.0508	0.048768	4	1	1	1.73165	0.0140018
McAllister	0.0222673	1.25	0.0112014	1000	1454	0.000902	0.000591	0.0376	0.003175	0.21	0.0508	0.048768	4	1	1	1.72822	0.0140018
McAllister	0.0221827	1.25	0.0112014	1000	1454	0.000902	0.000591	0.0376	0.003175	0.21	0.0508	0.048768	4	1	1	1.72917	0.0140018
McAllister	0.016256	1.25	0.035433	1000	1454	0.000902	0.000591	0.0376	0.003175	0.21	0.0508	0.048768	4	1	1	1.72727	0.0442912
McAllister	0.01651	1.25	0.035433	1000	1454	0.000902	0.000591	0.0376	0.003175	0.21	0.0508	0.048768	4	1	1	1.73109	0.0442912
McAllister	0.0161713	1.25	0.035433	1000	1454	0.000902	0.000591	0.0376	0.003175	0.21	0.0508	0.048768	4	1	1	1.72857	0.0442912
McAllister	0.0273473	1	0.0199136	1000	1454	0.000902	0.000591	0.0376	0.003175	0.21	0.0508	0.048768	4	1	1	1	0.0199136
McAllister	0.0290407	1	0.0199136	1000	1454	0.000902	0.000591	0.0376	0.003175	0.21	0.0508	0.048768	4	1	1	1	0.0199136
McAllister	0.0277707	1	0.0199136	1000	1454	0.000902	0.000591	0.0376	0.003175	0.21	0.0508	0.048768	4	1	1	1	0.0199136
McAllister	0.0265853	1	0.0199136	1000	1454	0.000902	0.000591	0.0376	0.003175	0.21	0.0508	0.048768	4	1	1	1	0.0199136
McAllister	0.0257387	1	0.0199136	1000	1454	0.000902	0.000591	0.0376	0.003175	0.21	0.0508	0.048768	4	1	1	1	0.0199136
McAllister	0.010922	1	0.0062992	1000	1454	0.000902	0.000591	0.0376	0.003175	0.21	0.0508	0.048768	4	1	1	1	0.0062992
McAllister	0.0118533	1	0.0062992	1000	1454	0.000902	0.000591	0.0376	0.003175	0.21	0.0508	0.048768	4	1	1	1	0.0062992
McAllister	0.011176	1	0.0062992	1000	1454	0.000902	0.000591	0.0376	0.003175	0.21	0.0508	0.048768	4	1	1	1	0.0062992
McAllister	0.011176	1	0.0062992	1000	1454	0.000902	0.000591	0.0376	0.003175	0.21	0.0508	0.048768	4	1	1	1	0.0062992
McAllister	0.00855133	1	0.0062992	1000	1454	0.000902	0.000591	0.0376	0.003175	0.21	0.0508	0.048768	4	1	1	1	0.0062992
McAllister	0.00889	1	0.0062992	1000	1454	0.000902	0.000591	0.0376	0.003175	0.21	0.0508	0.048768	4	1	1	1	0.0062992
McAllister	0.0176107	0.5	0.0199136	1000	1454	0.000902	0.000591	0.0376	0.003175	0.21	0.0508	0.048768	4	1	1	1	0.0099568
McAllister	0.018034	0.5	0.0199136	1000	1454	0.000902	0.000591	0.0376	0.003175	0.21	0.0508	0.048768	4	1	1	1	0.0099568
McAllister	0.0231987	1.5	0.0199136	1000	1454	0.000902	0.000591	0.0376	0.003175	0.21	0.0508	0.048768	4	1	1	1	0.0298704
McAllister	0.0220133	1.5	0.0199136	1000	1454	0.000902	0.000591	0.0376	0.003175	0.21	0.0508	0.048768	4	1	1	1	0.0298704
McAllister	0.023368	1.5	0.0199136	1000	1454	0.000902	0.000591	0.0376	0.003175	0.21	0.0508	0.048768	4	1	1	1	0.0298704
McAllister	0.0329353	1	0.0199136	1000	1454	0.000902	0.000591	0.0376	0.003175	0.21	0.0508	0.048768	4	1	1	0.333562	0.0199136
McAllister	0.032766	1	0.0199136	1000	1454	0.000902	0.000591	0.0376	0.003175	0.21	0.0508	0.048768	4	1	1	0.333104	0.0199136
McAllister	0.031496	1	0.0186436	1000	1454	0.000902	0.000591	0.0376	0.003175	0.21	0.0508	0.048768	4	1	1	0.333333	0.0186436
McAllister	0.032512	1	0.0199136	1000	1454	0.000902	0.000591	0.0376	0.003175	0.21	0.0508	0.048768	4	1	1	0.333333	0.0199136
McAllister	0.023114	1	0.0199136	1000	1454	0.000902	0.000591	0.0376	0.003175	0.21	0.0508	0.048768	4	1	1	3.00293	0.0199136
McAllister	0.0221827	1	0.0199136	1000	1454	0.000902	0.000591	0.0376	0.003175	0.21	0.0508	0.048768	4	1	1	3	0.0199136
McAllister	0.022352	1	0.0199136	1000	1454	0.000902	0.000591	0.0376	0.003175	0.21	0.0508	0.048768	4	1	1	3.00607	0.0199136
McAllister	0.022352	1	0.0199136	1000	1454	0.000902	0.000591	0.0376	0.003175	0.21	0.0508	0.048768	4	1	1	3.04908	0.0199136
McAllister	0.0237913	1	0.0199136	1000	1454	0.000902	0.000591	0.0376	0.003175	0.21	0.0508	0.048768	4	1	1	3.00285	0.0199136
McAllister	0.008636	0.625	0.0084074	1000	1454	0.000902	0.000591	0.0376	0.003175	0.21	0.0508	0.048768	4	1	1	1	0.00525463
McAllister	0.00956733	0.625	0.0084074	1000	1454	0.000902	0.000591	0.0376	0.003175	0.21	0.0508	0.048768	4	1	1	1	0.00525463
McAllister	0.0182033	1.375	0.0084074	1000	1454	0.000902	0.000591	0.0376	0.003175	0.21	0.0508	0.048768	4	1	1	1	0.0115602
McAllister	0.018288	1.375	0.0084074	1000	1454	0.000902	0.000591	0.0376	0.003175	0.21	0.0508	0.048768	4	1	1	1	0.0115602
McAllister	0.014732	1	0.0084074	1000	1454	0.000902	0.000591	0.0376	0.003175	0.21	0.0508	0.048768	4	1	1	0.439206	0.0084074
McAllister	0.0151553	1	0.0084074	1000	1454	0.000902	0.000591	0.0376	0.003175	0.21	0.0508	0.048768	4	1	1	0.440064	0.0084074
McAllister	0.0154093	1	0.0084074	1000	1454	0.000902	0.000591	0.0376	0.003175	0.21	0.0508	0.048768	4	1	1	2.27928	0.0084074
McAllister	0.015494	1	0.0084074	1000	1454	0.000902	0.000591	0.0376	0.003175	0.21	0.0508	0.048768	4	1	1	2.27957	0.0084074
McAllister	0.0201507	0.625	0.0469646	1000	1454	0.000902	0.000591	0.0376	0.003175	0.21	0.0508	0.048768	4	1	1	1	0.0293529
McAllister	0.0211667	0.625	0.0469646	1000	1454	0.000902	0.000591	0.0376	0.003175	0.21	0.0508	0.048768	4	1	1	1	0.0293529
McAllister	0.006096	1.375	0.0469646	1000	1454	0.000902	0.000591	0.0376	0.003175	0.21	0.0508	0.048768	4	1	1	0.87013	0.0645763
McAllister	0.00668867	1.375	0.0469646	1000	1454	0.000902	0.000591	0.0376	0.003175	0.21	0.0508	0.048768	4	1	1	1	0.0645763
McAllister	0.0143933	1	0.0469646	1000	1454	0.000902	0.000591	0.0376	0.003175	0.21	0.0508	0.048768	4	1	1	0.439458	0.0469646
McAllister	0.0143087	1	0.0342646	1000	1454	0.000902	0.000591	0.0376	0.003175	0.21	0.0508	0.048768	4	1	1	0.439523	0.0342646
McAllister	0.010414	1	0.0469646	1000	1454	0.000902	0.000591	0.0376	0.003175	0.21	0.0508	0.048768	4	1	1	2.28	0.0469646
McAllister	0.011684	1	0.0469646	1000	1454	0.000902	0.000591	0.0376	0.003175	0.21	0.0508	0.048768	4	1	1	2.27791	0.0469646
McAllister	0.0221827	0.625	0.0199136	1000	1454	0.000902	0.000591	0.0376	0.003175	0.21	0.0508	0.048768	4	1	1	0.43956	0.012446
McAllister	0.0222673	0.625	0.0199136	1000	1454	0.000902	0.000591	0.0376	0.003175	0.21	0.0508	0.048768	4	1	1	0.439518	0.012446
McAllister	0.0198967	0.625	0.0199136	1000	1454	0.000902	0.000591	0.0376	0.003175	0.21	0.0508	0.048768	4	1	1	2.28212	0.012446
McAllister	0.0212513	0.625	0.0199136	1000	1454	0.000902	0.000591	0.0376	0.003175	0.21	0.0508	0.048768	4	1	1	2.28105	0.012446
McAllister	0.028194	1.375	0.0199136	1000	1454	0.000902	0.000591	0.0376	0.003175	0.21	0.0508	0.048768	4	1	1	0.438445	0.0273812
McAllister	0.0293793	1.375	0.0199136	1000	1454	0.000902	0.000591	0.0376	0.003175	0.21	0.0508	0.048768	4	1	1	0.43864	0.0273812
McAllister	0.0189653	1.375	0.0199136	1000	1454	0.000902	0.000591	0.0376	0.003175	0.21	0.0508	0.048768	4	1	1	2.27965	0.0273812
McAllister	0.0201507	1.375	0.0199136	1000	1454	0.000902	0.000591	0.0376	0.003175	0.21	0.0508	0.048768	4	1	1	2.27824	0.0273812
McAllister	0.00857673	1	0.01905	998	751	0.00091	0.00132	0.042	0.001016	0.227	0.0254	0.0508	4	1	1	0.95183	0.01905
McAllister	0.00841587	1	0.01905	998	751	0.00091	0.00132	0.042	0.001016	0.227	0.0254	0.0508	4	1	1	1.51646	0.01905
McAllister	0.0075438	1	0.01905	998	751	0.00091	0.00132	0.042	0.001016	0.227	0.0254	0.0508	4	1	1	3.43284	0.01905
McAllister	0.00951653	1	0.01905	998	751	0.00091	0.00132	0.042	0.001016	0.227	0.0254	0.0508	4	1	1	0.934596	0.01905
McAllister	0.010541	1	0.01905	998	751	0.00091	0.00132	0.042	0.001016	0.227	0.0254	0.0508	4	1	1	0.781116	0.01905
McAllister	0.0124968	1	0.01905	998	751	0.00091	0.00132	0.042	0.001016	0.227	0.0254	0.0508	4	1	1	0.5	0.01905
McAllister	0.0152908	1	0.01905	998	751	0.00091	0.00132	0.042	0.001016	0.227	0.0254	0.0508	4	1	1	0.263821	0.01905
McAllister	0.00592667	1.56667	0.01905	998	751	0.00091	0.00132	0.042	0.001016	0.227	0.0254	0.0508	4	1	1	0.917808	0.029845
McAllister	0.00658707	1.56667	0.01905	998	751	0.00091	0.00132	0.042	0.001016	0.227	0.0254	0.0508	4	1	1	0.581301	0.029845
McAllister	0.00859367	1.56667	0.01905	998	751	0.00091	0.00132	0.042	0.001016	0.227	0.0254	0.0508	4	1	1	0.289708	0.029845
McAllister	0.00476673	1.56667	0.01905	998	751	0.00091	0.00132	0.042	0.001016	0.227	0.0254	0.0508	4	1	1	2.67974	0.029845
McAllister	0.0102616	0.666667	0.01905	998	751	0.00091	0.00132	0.042	0.001016	0.227	0.0254	0.0508	4	1	1	1.08606	0.0127
McAllister	0.0117517	0.666667	0.01905	998	751	0.00091	0.00132	0.042	0.001016	0.227	0.0254	0.0508	4	1	1	0.763659	0.0127
McAllister	0.0141055	0.666667	0.01905	998	751	0.00091	0.00132	0.042	0.001016	0.227	0.0254	0.0508	4	1	1	0.254518	0.0127
McAllister	0.00790787	0.666667	0.01905	998	751	0.00091	0.00132	0.042	0.001016	0.227	0.0254	0.0508	4	1	1	3.57843	0.0127
McAllister	0.00694267	1.3	0.01905	998	751	0.00091	0.00132	0.042	0.001016	0.227	0.0254	0.0508	4	1	1	1.08122	0.024765
McAllister	0.00849207	1.3	0.01905	998	751	0.00091	0.00132	0.042	0.001016	0.227	0.0254	0.0508	4	1	1	0.666113	0.024765
McAllister	0.0109051	1.3	0.01905	998	751	0.00091	0.00132	0.042	0.001016	0.227	0.0254	0.0508	4	1	1	0.318321	0.024765
McAllister	0.00579967	1.3	0.01905	998	751	0.00091	0.00132	0.042	0.001016	0.227	0.0254	0.0508	4	1	1	4.07407	0.024765
McAllister	0.00836507	0.833333	0.01905	998	751	0.00091	0.00132	0.042	0.001016	0.227	0.0254	0.0508	4	1	1	3.94	0.015875
McAllister	0.0104733	0.833333	0.01905	998	751	0.00091	0.00132	0.042	0.001016	0.227	0.0254	0.0508	4	1	1	1.05141	0.015875
McAllister	0.0127423	0.833333	0.01905	998	751	0.00091	0.00132	0.042	0.001016	0.227	0.0254	0.0508	4	1	1	0.500499	0.015875
McAllister	0.00506307	2.03333	0.01905	998	751	0.00091	0.00132	0.042	0.001016	0.227	0.0254	0.0508	4	1	1	0.472906	0.038735
McAllister	0.0038862	2.03333	0.01905	998	751	0.00091	0.00132	0.042	0.001016	0.227	0.0254	0.0508	4	1	1	1.31818	0.038735
McAllister	0.00338667	2.03333	0.01905	998	751	0.00091	0.00132	0.042	0.001016	0.227	0.0254	0.0508	4	1	1	2.53982	0.038735
McAllister	0.00346287	2.03333	0.01905	998	751	0.00091	0.00132	0.042	0.001016	0.227	0.0254	0.0508	4	1	1	2.52586	0.038735
McAllister	0.00679027	2.03333	0.01905	998	751	0.00091	0.00132	0.042	0.001016	0.227	0.0254	0.0508	4	1	1	0.145714	0.038735
McAllister	0.00381847	2.03333	0.01905	998	751	0.00091	0.00132	0.042	0.001016	0.227	0.0254	0.0508	4	1	1	1.21078	0.038735
McAllister	0.005842	2.03333	0.01905	998	751	0.00091	0.00132	0.042	0.001016	0.227	0.0254	0.0508	4	1	1	0.273063	0.038735
McAllister	0.00983827	1.56667	0.01905	998	751	0.00091	0.00132	0.042	0.001016	0.227	0.0254	0.0508	4	1	1	0.157371	0.029845
McAllister	0.0037846	2.4	0.01905	998	751	0.00091	0.00132	0.042	0.001016	0.227	0.0254	0.0508	4	1	1	0.510135	0.04572
McAllister	0.00765387	0.333333	0.01905	998	751	0.00091	0.00132	0.042	0.001016	0.227	0.0254	0.0508	4	1	1	1.26566	0.00635
McAllister	0.00453813	1	0.04064	998	751	0.00091	0.00132	0.042	0.001016	0.227	0.0254	0.0508	4	1	1	0.377892	0.04064
McAllister	0.00362373	1	0.04064	998	751	0.00091	0.00132	0.042	0.001016	0.227	0.0254	0.0508	4	1	1	1.12935	0.04064
McAllister	0.00308187	1	0.04064	998	751	0.00091	0.00132	0.042	0.001016	0.227	0.0254	0.0508	4	1	1	2.46667	0.04064
McAllister	0.005969	1	0.04064	998	751	0.00091	0.00132	0.042	0.001016	0.227	0.0254	0.0508	4	1	1	0.190878	0.04064
McAllister	0.0080518	0.666667	0.04064	998	751	0.00091	0.00132	0.042	0.001016	0.227	0.0254	0.0508	4	1	1	0.609137	0.0270933
McAllister	0.00679027	0.666667	0.04064	998	751	0.00091	0.00132	0.042	0.001016	0.227	0.0254	0.0508	4	1	1	0.941889	0.0270933
McAllister	0.0056388	0.666667	0.04064	998	751	0.00091	0.00132	0.042	0.001016	0.227	0.0254	0.0508	4	1	1	2.38071	0.0270933
McAllister	0.00993987	0.666667	0.04064	998	751	0.00091	0.00132	0.042	0.001016	0.227	0.0254	0.0508	4	1	1	0.325056	0.0270933
McAllister	0.0117687	0.416667	0.04064	998	751	0.00091	0.00132	0.042	0.001016	0.227	0.0254	0.0508	4	1	1	0.595867	0.0169333
McAllister	0.00993987	0.416667	0.04064	998	751	0.00091	0.00132	0.042	0.001016	0.227	0.0254	0.0508	4	1	1	1.01372	0.0169333
McAllister	0.00823807	0.416667	0.04064	998	751	0.00091	0.00132	0.042	0.001016	0.227	0.0254	0.0508	4	1	1	2.19016	0.0169333
McAllister	0.00287867	1.56667	0.04064	998	751	0.00091	0.00132	0.042	0.001016	0.227	0.0254	0.0508	4	1	1	0.11293	0.0636693
McAllister	0.001651	1.56667	0.04064	998	751	0.00091	0.00132	0.042	0.001016	0.227	0.0254	0.0508	4	1	1	0.832707	0.0636693
McAllister	0.00920327	1.56667	0.009525	998	751	0.00091	0.00132	0.042	0.001016	0.227	0.0254	0.0508	4	1	1	1.72431	0.0149225
McAllister	0.00991447	1.56667	0.009525	998	751	0.00091	0.00132	0.042	0.001016	0.227	0.0254	0.0508	4	1	1	0.981387	0.0149225
McAllister	0.00923713	2.03333	0.009525	998	751	0.00091	0.00132	0.042	0.001016	0.227	0.0254	0.0508	4	1	1	0.849153	0.0193675
McAllister	0.0107188	2.03333	0.009525	998	751	0.00091	0.00132	0.042	0.001016	0.227	0.0254	0.0508	4	1	1	0.606599	0.0193675
McAllister	0.0147151	2.03333	0.009525	998	751	0.00091	0.00132	0.042	0.001016	0.227	0.0254	0.0508	4	1	1	0.21284	0.0193675
McAllister	0.00773007	2.03333	0.009525	998	751	0.00091	0.00132	0.042	0.001016	0.227	0.0254	0.0508	4	1	1	2.03322	0.0193675
McAllister	0.00682413	2.03333	0.009525	998	751	0.00091	0.00132	0.042	0.001016	0.227	0.0254	0.0508	4	1	1	4.2	0.0193675
McAllister	0.00590127	2.4	0.009525	998	751	0.00091	0.00132	0.042	0.001016	0.227	0.0254	0.0508	4	1	1	3.46795	0.02286
McAllister	0.00702733	2.4	0.009525	998	751	0.00091	0.00132	0.042	0.001016	0.227	0.0254	0.0508	4	1	1	1.76667	0.02286
McAllister	0.0086614	2.4	0.009525	998	751	0.00091	0.00132	0.042	0.001016	0.227	0.0254	0.0508	4	1	1	0.705	0.02286
McAllister	0.0112183	2.4	0.009525	998	751	0.00091	0.00132	0.042	0.001016	0.227	0.0254	0.0508	4	1	1	0.345178	0.02286
McAllister	0.0147828	2.4	0.009525	998	751	0.00091	0.00132	0.042	0.001016	0.227	0.0254	0.0508	4	1	1	0.145669	0.02286
McAllister	0.00577427	3	0.009525	998	751	0.00091	0.00132	0.042	0.001016	0.227	0.0254	0.0508	4	1	1	0.954155	0.028575
McAllister	0.004826	3	0.009525	998	751	0.00091	0.00132	0.042	0.001016	0.227	0.0254	0.0508	4	1	1	2.67742	0.028575
McAllister	0.00516467	3	0.009525	998	751	0.00091	0.00132	0.042	0.001016	0.227	0.0254	0.0508	4	1	1	1.62931	0.028575
McAllister	0.00732367	3	0.009525	998	751	0.00091	0.00132	0.042	0.001016	0.227	0.0254	0.0508	4	1	1	0.481164	0.028575
McAllister	0.00943187	3	0.009525	998	751	0.00091	0.00132	0.042	0.001016	0.227	0.0254	0.0508	4	1	1	0.129817	0.028575
McAllister	0.00564727	3.33333	0.009525	998	751	0.00091	0.00132	0.042	0.001016	0.227	0.0254	0.0508	4	1	1	0.663342	0.03175
McAllister	0.0049022	3.33333	0.009525	998	751	0.00091	0.00132	0.042	0.001016	0.227	0.0254	0.0508	4	1	1	1.7971	0.03175
McAllister	0.004445	3.33333	0.009525	998	751	0.00091	0.00132	0.042	0.001016	0.227	0.0254	0.0508	4	1	1	1.54854	0.03175
McAllister	0.00656167	3.33333	0.009525	998	751	0.00091	0.00132	0.042	0.001016	0.227	0.0254	0.0508	4	1	1	0.329331	0.03175
McAllister	0.00921173	3.33333	0.009525	998	751	0.00091	0.00132	0.042	0.001016	0.227	0.0254	0.0508	4	1	1	0.088	0.03175
McAllister	0.00430107	3.33333	0.009525	998	751	0.00091	0.00132	0.042	0.001016	0.227	0.0254	0.0508	4	1	1	3.61818	0.03175
McAllister	0.00219287	1.83333	0.028575	998	751	0.00091	0.00132	0.042	0.001016	0.227	0.0254	0.0508	4	1	1	1.39815	0.0523875
McAllister	0.0028448	1.83333	0.028575	998	751	0.00091	0.00132	0.042	0.001016	0.227	0.0254	0.0508	4	1	1	0.655172	0.0523875
McAllister	0.00390313	1.83333	0.028575	998	751	0.00091	0.00132	0.042	0.001016	0.227	0.0254	0.0508	4	1	1	0.162673	0.0523875
McAllister	0.0060198	1.18333	0.028575	998	751	0.00091	0.00132	0.042	0.001016	0.227	0.0254	0.0508	4	1	1	0.90107	0.0338138
McAllister	0.00458047	1.18333	0.028575	998	751	0.00091	0.00132	0.042	0.001016	0.227	0.0254	0.0508	4	1	1	1.34199	0.0338138
McAllister	0.0067564	1.18333	0.028575	998	751	0.00091	0.00132	0.042	0.001016	0.227	0.0254	0.0508	4	1	1	0.347973	0.0338138
McAllister	0.00801793	1.16667	0.028575	998	751	0.00091	0.00132	0.042	0.001016	0.227	0.0254	0.0508	4	1	1	0.20254	0.0333375
McAllister	0.00964353	0.375	0.028575	998	751	0.00091	0.00132	0.042	0.001016	0.227	0.0254	0.0508	4	1	1	1.26441	0.0107156
McAllister	0.0103039	0.375	0.028575	998	751	0.00091	0.00132	0.042	0.001016	0.227	0.0254	0.0508	4	1	1	0.892691	0.0107156
McAllister	0.0109813	0.375	0.028575	998	751	0.00091	0.00132	0.042	0.001016	0.227	0.0254	0.0508	4	1	1	0.684416	0.0107156
McAllister	0.0120481	0.375	0.028575	998	751	0.00091	0.00132	0.042	0.001016	0.227	0.0254	0.0508	4	1	1	0.43159	0.0107156
McAllister	0.0090932	0.375	0.028575	998	751	0.00091	0.00132	0.042	0.001016	0.227	0.0254	0.0508	4	1	1	2.43131	0.0107156
McAllister	0.00791633	0.241667	0.028575	998	751	0.00091	0.00132	0.042	0.001016	0.227	0.0254	0.0508	4	1	1	1.98722	0.00690563
McAllister	0.0086614	0.241667	0.028575	998	751	0.00091	0.00132	0.042	0.001016	0.227	0.0254	0.0508	4	1	1	1.07505	0.00690563
McAllister	0.00994833	0.241667	0.028575	998	751	0.00091	0.00132	0.042	0.001016	0.227	0.0254	0.0508	4	1	1	0.661952	0.00690563
McAllister	0.00709507	0.241667	0.028575	998	751	0.00091	0.00132	0.042	0.001016	0.227	0.0254	0.0508	4	1	1	3.00957	0.00690563
McAllister	0.010795	0.241667	0.028575	998	751	0.00091	0.00132	0.042	0.001016	0.227	0.0254	0.0508	4	1	1	0.294416	0.00690563
McAllister	0.0062484	1	0.028575	998	751	0.00091	0.00132	0.042	0.001016	0.227	0.0127	0.0508	4	1	1	0.5	0.028575
McAllister	0.00486833	1	0.028575	998	751	0.00091	0.00132	0.042	0.001016	0.227	0.0127	0.0508	4	1	1	1.21154	0.028575
McAllister	0.0041656	1	0.028575	998	751	0.00091	0.00132	0.042	0.001016	0.227	0.0127	0.0508	4	1	1	2	0.028575
McAllister	0.00973667	1	0.028575	998	751	0.00091	0.00132	0.042	0.001016	0.227	0.0127	0.0508	4	1	1	0.13189	0.028575
McAllister	0.0040386	1	0.028575	998	751	0.00091	0.00132	0.042	0.001016	0.227	0.0127	0.0508	4	1	1	2.66923	0.028575
McAllister	0.0055118	0.666667	0.028575	998	751	0.00091	0.00132	0.042	0.001016	0.227	0.0127	0.0508	4	1	1	4.425	0.01905
McAllister	0.00733213	0.666667	0.028575	998	751	0.00091	0.00132	0.042	0.001016	0.227	0.0127	0.0508	4	1	1	1.14356	0.01905
McAllister	0.0107273	0.666667	0.028575	998	751	0.00091	0.00132	0.042	0.001016	0.227	0.0127	0.0508	4	1	1	0.272088	0.01905
McAllister	0.00191347	1.66667	0.028575	998	751	0.00091	0.00132	0.042	0.001016	0.227	0.0127	0.0508	4	1	1	0.928328	0.047625
McAllister	0.00266785	1.33333	0.028575	998	751	0.00091	0.00132	0.042	0.001016	0.227	0.0127	0.0508	4	1	1	0.890222	0.0381
McAllister	0.0084328	1	0.028575	998	751	0.00091	0.00132	0.042	0.001016	0.227	0.0508	0.0508	4	1	1	0.654485	0.028575
McAllister	0.00735753	1	0.028575	998	751	0.00091	0.00132	0.042	0.001016	0.227	0.0508	0.0508	4	1	1	1.16708	0.028575
McAllister	0.00651933	1	0.028575	998	751	0.00091	0.00132	0.042	0.001016	0.227	0.0508	0.0508	4	1	1	2.59813	0.028575
McAllister	0.0105918	1	0.028575	998	751	0.00091	0.00132	0.042	0.001016	0.227	0.0508	0.0508	4	1	1	0.270051	0.028575
McAllister	0.00535093	1.66667	0.028575	998	751	0.00091	0.00132	0.042	0.001016	0.227	0.0508	0.0508	4	1	1	0.288744	0.047625
McAllister	0.00460587	1.66667	0.028575	998	751	0.00091	0.00132	0.042	0.001016	0.227	0.0508	0.0508	4	1	1	0.661069	0.047625
McAllister	0.00389467	1.66667	0.028575	998	751	0.00091	0.00132	0.042	0.001016	0.227	0.0508	0.0508	4	1	1	1.15962	0.047625
McAllister	0.00380153	1.66667	0.028575	998	751	0.00091	0.00132	0.042	0.001016	0.227	0.0508	0.0508	4	1	1	2.65041	0.047625
McAllister	0.0101177	0.666667	0.028575	998	751	0.00091	0.00132	0.042	0.001016	0.227	0.0508	0.0508	4	1	1	1.357	0.01905
McAllister	0.0106595	0.666667	0.028575	998	751	0.00091	0.00132	0.042	0.001016	0.227	0.0508	0.0508	4	1	1	0.936923	0.01905
McAllister	0.0125899	0.416667	0.028575	998	751	0.00091	0.00132	0.042	0.001016	0.227	0.0508	0.0508	4	1	1	0.90641	0.0119063
McAllister	0.0058166	1	0.028575	998	751	0.00091	0.00132	0.042	0.001016	0.227	0.0508	0.0508	4	1	1	6.98837	0.028575
McAllister	0.0075946	1	0.0254	998	751	0.00091	0.00132	0.042	0.001016	0.227	0.0508	0.0508	4	1	1	0.984513	0.0254
McAllister	0.00517313	1.66667	0.0254	998	751	0.00091	0.00132	0.042	0.001016	0.227	0.0508	0.0508	4	1	1	0.996732	0.0423333
McAllister	0.00361527	2.4	0.0254	998	751	0.00091	0.00132	0.042	0.001016	0.227	0.0508	0.0508	4	1	1	0.967742	0.06096
McAllister	0.00900853	0.833333	0.0254	998	751	0.00091	0.00132	0.042	0.001016	0.227	0.0508	0.0508	4	1	1	0.9631	0.0211667
McAllister	0.00832273	1	0.028575	998	751	0.00091	0.00132	0.042	0.001016	0.227	0.0508	0.0508	4	1	1	1.12311	0.028575
McAllister	0.00872913	1	0.028575	998	751	0.00091	0.00132	0.042	0.001016	0.227	0.0508	0.0508	4	1	1	0.857658	0.028575
McAllister	0.00476673	1.66667	0.028575	998	751	0.00091	0.00132	0.042	0.001016	0.227	0.0508	0.0508	4	1	1	0.870432	0.047625
McAllister	0.008001	1	0.028575	998	751	0.00091	0.00132	0.042	0.001016	0.227	0.1016	0.0508	4	1	1	2.20339	0.028575
McAllister	0.0096774	1	0.028575	998	751	0.00091	0.00132	0.042	0.001016	0.227	0.1016	0.0508	4	1	1	0.90183	0.028575
McAllister	0.0072898	1	0.028575	998	751	0.00091	0.00132	0.042	0.001016	0.227	0.1016	0.0508	4	1	1	4.44937	0.028575
McAllister	0.00484293	1.5	0.028575	998	751	0.00091	0.00132	0.042	0.001016	0.227	0.1016	0.0508	4	1	1	2.62025	0.0428625
McAllister	0.0113115	1.33333	0.015875	998	751	0.00091	0.00132	0.042	0.003175	0.242	0.0254	0.0508	4	1	1	2.25061	0.0211667
McAllister	0.0125899	1.33333	0.015875	998	751	0.00091	0.00132	0.042	0.003175	0.242	0.0254	0.0508	4	1	1	1.28769	0.0211667
McAllister	0.0141986	1.33333	0.015875	998	751	0.00091	0.00132	0.042	0.003175	0.242	0.0254	0.0508	4	1	1	0.886389	0.0211667
McAllister	0.0170519	1.33333	0.015875	998	751	0.00091	0.00132	0.042	0.003175	0.242	0.0254	0.0508	4	1	1	0.478708	0.0211667
McAllister	0.02032	1.33333	0.015875	998	751	0.00091	0.00132	0.042	0.003175	0.242	0.0254	0.0508	4	1	1	0.292407	0.0211667
McAllister	0.0109559	1.33333	0.015875	998	751	0.00091	0.00132	0.042	0.003175	0.242	0.0254	0.0508	4	1	1	4.28163	0.0211667
McAllister	0.00808567	1.83333	0.015875	998	751	0.00091	0.00132	0.042	0.003175	0.242	0.0254	0.0508	4	1	1	2.88211	0.0291042
McAllister	0.0088392	1.83333	0.015875	998	751	0.00091	0.00132	0.042	0.003175	0.242	0.0254	0.0508	4	1	1	1.59057	0.0291042
McAllister	0.0103886	1.83333	0.015875	998	751	0.00091	0.00132	0.042	0.003175	0.242	0.0254	0.0508	4	1	1	0.780842	0.0291042
McAllister	0.0042672	3	0.015875	998	751	0.00091	0.00132	0.042	0.003175	0.242	0.0254	0.0508	4	1	1	1.08264	0.047625
McAllister	0.0166201	0.833333	0.015875	998	751	0.00091	0.00132	0.042	0.003175	0.242	0.0254	0.0508	4	1	1	0.970884	0.0132292
McAllister	0.0173736	0.75	0.0254	998	751	0.00091	0.00132	0.042	0.003175	0.242	0.0508	0.0508	4	1	1	1	0.01905
McAllister	0.0111591	1.33333	0.0254	998	751	0.00091	0.00132	0.042	0.003175	0.242	0.0508	0.0508	4	1	1	0.978979	0.0338667
McAllister	0.00590973	2	0.0254	998	751	0.00091	0.00132	0.042	0.003175	0.242	0.0508	0.0508	4	1	1	1	0.0508
McAllister	0.00430107	2.4	0.0254	998	751	0.00091	0.00132	0.042	0.003175	0.242	0.0508	0.0508	4	1	1	0.984375	0.06096
McAllister	0.0200321	0.833333	0.0254	998	751	0.00091	0.00132	0.042	0.0047244	0.224	0.0508	0.0508	4	1	1	1	0.0211667
McAllister	0.00666327	1.66667	0.0254	998	751	0.00091	0.00132	0.042	0.0047244	0.224	0.0508	0.0508	4	1	1	0.952854	0.0423333
McAllister	0.0116501	1.25	0.0254	998	751	0.00091	0.00132	0.042	0.0047244	0.224	0.0508	0.0508	4	1	1	0.991317	0.03175
McAllister	0.0049276	2	0.0254	998	751	0.00091	0.00132	0.042	0.0047244	0.224	0.0508	0.0508	4	1	1	1	0.0508
McAllister	0.0216239	0.583333	0.0254	998	751	0.00091	0.00132	0.042	0.0047244	0.224	0.0508	0.0508	4	1	1	1	0.0148167
McAllister	0.0102531	1.33333	0.0254	998	751	0.00091	0.00132	0.042	0.0047244	0.224	0.0508	0.0508	4	1	1	1.01498	0.0338667
McAllister	0.00877147	1.33333	0.0254	998	751	0.00091	0.00132	0.042	0.0047244	0.224	0.0508	0.0508	4	1	1	2.48822	0.0338667
McAllister	0.0200829	0.5	0.0254	998	751	0.00091	0.00132	0.042	0.0047244	0.224	0.0508	0.0508	4	1	1	1	0.0127
McAllister	0.0207095	0.666667	0.0254	998	751	0.00091	0.00132	0.042	0.0047244	0.224	0.0508	0.0508	4	1	1	1	0.0169333
McAllister	0.00461433	2	0.0254	998	751	0.00091	0.00132	0.042	0.0047244	0.224	0.0508	0.0508	4	1	1	0.989051	0.0508
McAllister	0.0125645	1	0.0254	993	751	0.00091	0.00132	0.042	0.0020066	0.235	0.0508	0.0508	4	1	1	0.981308	0.0254
McAllister	0.00824653	1.66667	0.0254	998	751	0.00091	0.00132	0.042	0.0020066	0.235	0.0508	0.0508	4	1	1	0.979675	0.0423333
McAllister	0.009398	1.33333	0.0254	998	751	0.00091	0.00132	0.042	0.0020066	0.235	0.0508	0.0508	4	1	1	0.982143	0.0338667
McAllister	0.0056388	2	0.0254	998	751	0.00091	0.00132	0.042	0.0020066	0.235	0.0508	0.0508	4	1	1	1	0.0508
McAllister	0.011049	0.666667	0.0254	998	751	0.00091	0.00132	0.042	0.0020066	0.235	0.0508	0.0508	4	1	1	0.432492	0.0169333
McAllister	0.00420793	2.33333	0.0254	998	751	0.00091	0.00132	0.042	0.0020066	0.235	0.0508	0.0508	4	1	1	0.98008	0.0592667
McAllister	0.00580813	1.66667	0.0254	998	751	0.00091	0.00132	0.042	0.0006858	0.229	0.0508	0.0508	4	1	1	1.01173	0.0423333
McAllister	0.00768773	1.25	0.0254	998	751	0.00091	0.00132	0.042	0.0006858	0.229	0.0508	0.0508	4	1	1	0.982533	0.03175
McAllister	0.00484293	2.4	0.0254	998	751	0.00091	0.00132	0.042	0.0006858	0.229	0.0508	0.0508	4	1	1	1	0.06096
McAllister	0.0039624	1.16667	0.0254	998	751	0.00091	0.00132	0.042	0.000508	0.226	0.0508	0.0508	4	1	1	0.983051	0.0296333
McAllister	0.00359833	1.5	0.0254	998	751	0.00091	0.00132	0.042	0.000508	0.226	0.0508	0.0508	4	1	1	0.995305	0.0381
McAllister	0.00356447	2	0.0254	998	751	0.00091	0.00132	0.042	0.000508	0.226	0.0508	0.0508	4	1	1	0.922374	0.0508
McAllister	0.0138091	1	0.0254	998	751	0.00091	0.00132	0.042	0.0020066	0.41	0.0508	0.0508	4	1	1	0.981774	0.0254
McAllister	0.0079502	1.66667	0.0254	998	751	0.00091	0.00132	0.042	0.0020066	0.41	0.0508	0.0508	4	1	1	0.981013	0.0423333
McAllister	0.00511387	2.4	0.0254	998	751	0.00091	0.00132	0.042	0.0020066	0.41	0.0508	0.0508	4	1	1	0.935897	0.06096
McAllister	0.0166963	0.666667	0.0254	998	751	0.00091	0.00132	0.042	0.0020066	0.41	0.0508	0.0508	4	1	1	1	0.0169333
McAllister	0.0117179	0.833333	0.0254	998	751	0.00091	0.00132	0.042	0.0020066	0.157	0.0508	0.0508	4	1	1	1.0413	0.0211667
McAllister	0.00458047	1.5	0.0254	998	751	0.00091	0.00132	0.042	0.0020066	0.157	0.0508	0.0508	4	1	1	0.974453	0.0381
McAllister	0.00758613	1.16667	0.0254	998	751	0.00091	0.00132	0.042	0.0020066	0.157	0.0508	0.0508	4	1	1	0.982301	0.0296333
McAllister	0.00809413	0.666667	0.0254	998	751	0.00091	0.00132	0.042	0.0020066	0.081	0.0508	0.0508	4	1	1	0.983402	0.0169333
McAllister	0.00362373	1	0.0254	998	751	0.00091	0.00132	0.042	0.0020066	0.081	0.0508	0.0508	4	1	1	0.981481	0.0254
McAllister	0.00504613	0.833333	0.0254	998	751	0.00091	0.00132	0.042	0.0020066	0.081	0.0508	0.0508	4	1	1	0.980066	0.0211667
McAllister	0.0145288	0.833333	0.0254	998	751	0.00091	0.00132	0.042	0.0020066	0.315	0.0508	0.0508	4	1	1	1	0.0211667
McAllister	0.008509	1.5	0.0254	998	751	0.00091	0.00132	0.042	0.0020066	0.315	0.0508	0.0508	4	1	1	0.962891	0.0381
McAllister	0.00618067	2	0.0254	998	751	0.00091	0.00132	0.042	0.0020066	0.315	0.0508	0.0508	4	1	1	1	0.0508
McAllister	0.0104225	1.33333	0.0254	998	751	0.00091	0.00132	0.042	0.0023876	0.345	0.0508	0.0508	4	1	1	0.982287	0.0338667
McAllister	0.0175429	0.666667	0.0254	998	751	0.00091	0.00132	0.042	0.0023876	0.345	0.0508	0.0508	4	1	1	1.00775	0.0169333
McAllister	0.00684107	2	0.0254	998	751	0.00091	0.00132	0.042	0.0023876	0.345	0.0508	0.0508	4	1	1	0.951691	0.0508
McAllister	0.00809413	1	0.0254	998	751	0.00091	0.00132	0.042	0.0023876	0.124	0.0508	0.0508	4	1	1	0.983402	0.0254
McAllister	0.0135805	0.666667	0.0254	998	751	0.00091	0.00132	0.042	0.0023876	0.124	0.0508	0.0508	4	1	1	1	0.0169333
McAllister	0.00430107	1.33333	0.0254	998	751	0.00091	0.00132	0.042	0.0023876	0.124	0.0508	0.0508	4	1	1	0.976654	0.0338667
McAllister	0.0102362	1	0.0254	998	751	0.00091	0.00132	0.042	0.0023876	0.124	0.0508	0.0508	4	1	1	0.978723	0.0254
McAllister	0.0134705	0.666667	0.0254	998	751	0.00091	0.00132	0.042	0.0023876	0.124	0.0508	0.0508	4	1	1	0.991239	0.0169333
McAllister	0.0058166	1.33333	0.0254	998	751	0.00091	0.00132	0.042	0.0023876	0.124	0.0508	0.0508	4	1	1	0.991304	0.0338667
McAllister	0.00423333	1.66667	0.0254	998	751	0.00091	0.00132	0.042	0.0023876	0.124	0.0508	0.0508	4	1	1	1	0.0423333
McAllister	0.012446	0.666667	0.0254	1112	794	0.00273	0.00127	0.0208	0.003175	0.23	0.0508	0.048768	3	1	1	2	0.0169333
McAllister	0.01016	0.833333	0.0254	1112	794	0.00273	0.00127	0.0208	0.003175	0.23	0.0508	0.048768	3	1	1	2	0.0211667
McAllister	0.00791633	1.08333	0.0254	1112	794	0.00273	0.00127	0.0208	0.003175	0.23	0.0508	0.048768	3	1	1	1.99679	0.0275167
McAllister	0.00564727	1.3	0.0254	1112	794	0.00273	0.00127	0.0208	0.003175	0.23	0.0508	0.048768	3	1	1	2.0045	0.03302
McAllister	0.0027686	1.62167	0.0254	1112	794	0.00273	0.00127	0.0208	0.003175	0.23	0.0508	0.048768	3	1	1	2	0.0411903
McAllister	0.0332655	0.998333	0.019558	996	805	0.00106	0.000614	0.0101	0.00079502	0.25	0.0508	0.0254	4	1	1	8.60636	0.0195254
McAllister	0.0135128	0.998333	0.07366	996	805	0.00106	0.000614	0.0101	0.00079502	0.25	0.0508	0.0254	4	1	1	2.83654	0.0735372
McAllister	0.0192617	0.998333	0.054102	996	805	0.00106	0.000614	0.0101	0.00079502	0.25	0.0508	0.0254	4	1	1	4.61728	0.0540118
McAllister	0.0222419	0.998333	0.054102	996	805	0.00106	0.000614	0.0101	0.00079502	0.25	0.0508	0.0254	4	1	1	2.26335	0.0540118
McAllister	0.0235204	0.998333	0.054102	996	805	0.00106	0.000614	0.0101	0.00079502	0.25	0.0508	0.0254	4	1	1	1.29967	0.0540118
McAllister	0.00339513	1.16667	0.0254	1112	802	0.00159	0.0013	0.016	0.003175	0.23	0.0508	0.0508	4	1	1	2.50218	0.0296333
McAllister	0.00565573	0.916667	0.0254	1112	802	0.00159	0.0013	0.016	0.003175	0.23	0.0508	0.0508	4	1	1	2.49738	0.0232833
McAllister	0.0089662	0.366667	0.0254	1112	802	0.00159	0.0013	0.016	0.003175	0.23	0.0508	0.0508	4	1	1	2.46078	0.00931333
McAllister	0.0036957	0.191667	0.0055372	994	803	0.000926	0.000605	0.0107	0.001016	0.23	0.0381	0.0254	4	1	1	0.0646341	0.0010613
McAllister	0.00755227	0.683333	0.0055372	994	803	0.000926	0.000605	0.0107	0.001016	0.23	0.0381	0.0254	4	1	1	1.0939	0.00378375
McAllister	0.0156295	0.866667	0.009017	994	803	0.000926	0.000605	0.0107	0.001016	0.23	0.0381	0.0254	4	1	1	3.50244	0.00781473
McAllister	0.00452459	0.25	0.0102616	994	803	0.000926	0.000605	0.0107	0.001016	0.23	0.0381	0.0254	4	1	1	6.59091	0.0025654
McAllister	0.0148463	1.03333	0.007493	994	803	0.000926	0.000605	0.0107	0.001016	0.23	0.0381	0.0254	4	1	1	7.83375	0.00774277
McAllister	0.0100592	0.2175	0.021082	994	803	0.000926	0.000605	0.0107	0.001016	0.23	0.0381	0.0254	4	1	1	0.182189	0.00458533
McAllister	0.00800947	0.558333	0.0065024	994	803	0.000926	0.000605	0.0107	0.001016	0.23	0.0381	0.0254	4	1	1	1.12108	0.00363051
McAllister	0.00346964	0.591667	0.002413	994	803	0.000926	0.000605	0.0107	0.001016	0.23	0.0381	0.0254	4	1	1	0.736441	0.00142769
McAllister	0.00762847	0.366667	0.010033	994	803	0.000926	0.000605	0.0107	0.001016	0.23	0.0381	0.0254	4	1	1	1.29847	0.00367877
McAllister	0.00471932	0.200333	0.010033	994	803	0.000926	0.000605	0.0107	0.001016	0.23	0.0381	0.0254	4	1	1	3.08651	0.00200994
McAllister	0.00209465	0.113333	0.0065024	994	803	0.000926	0.000605	0.0107	0.001016	0.23	0.0381	0.0254	4	1	1	1.23285	0.000736939
McAllister	0.0109559	0.75	0.007366	994	803	0.000926	0.000605	0.0107	0.001016	0.23	0.0381	0.0254	4	1	1	0.455568	0.0055245
McAllister	0.00676487	0.941667	0.0033528	994	803	0.000926	0.000605	0.0107	0.001016	0.23	0.0381	0.0254	4	1	1	5.44355	0.00315722
McAllister	0.00452967	1	0.0254	1088	950	0.00098	0.00308	0.0145	0.003175	0.23	0.0508	0.0762	4	1	1	5.52439	0.0254
McAllister	0.00679873	0.75	0.0254	1088	950	0.00098	0.00308	0.0145	0.003175	0.23	0.0508	0.0762	4	1	1	5.52846	0.01905
McAllister	0.0079248	0.666667	0.0254	1088	950	0.00098	0.00308	0.0145	0.003175	0.23	0.0508	0.0762	4	1	1	5.54545	0.0169333
McAllister	0.00452967	1.25	0.01524	1088	950	0.00098	0.00308	0.0145	0.003175	0.23	0.0508	0.0762	4	1	1	5.52439	0.01905
McAllister	0.00679873	1.08333	0.01524	1088	950	0.00098	0.00308	0.0145	0.003175	0.23	0.0508	0.0762	4	1	1	5.52846	0.01651
McAllister	0.0079248	0.833333	0.01524	1088	950	0.00098	0.00308	0.0145	0.003175	0.23	0.0508	0.0762	4	1	1	5.54545	0.0127
McAllister	0.0022606	1.08333	0.0381	1088	950	0.00098	0.00308	0.0145	0.003175	0.23	0.0508	0.0762	4	1	1	5.675	0.041275
McAllister	0.00452967	0.75	0.0381	1088	950	0.00098	0.00308	0.0145	0.003175	0.23	0.0508	0.0762	4	1	1	5.52439	0.028575
McAllister	0.00679873	0.583333	0.0381	1088	950	0.00098	0.00308	0.0145	0.003175	0.23	0.0508	0.0762	4	1	1	5.52846	0.022225
McAllister	0.0022606	1.58333	0.01524	1088	950	0.00098	0.00308	0.0145	0.00238252	0.23	0.0508	0.0762	4	1	1	5.675	0.02413
McAllister	0.00452967	1.41667	0.01524	1088	950	0.00098	0.00308	0.0145	0.00238252	0.23	0.0508	0.0762	4	1	1	5.52439	0.02159
McAllister	0.00679873	1.08333	0.01524	1088	950	0.00098	0.00308	0.0145	0.00238252	0.23	0.0508	0.0762	4	1	1	5.52846	0.01651
McAllister	0.0084836	1.41667	0.0254	999	849	0.000802	0.0024	0.0106	0.003175	0.23	0.0508	0.0762	4	1	1	2.56584	0.0359833
McAllister	0.0022606	1.58333	0.0254	999	849	0.000802	0.0024	0.0106	0.003175	0.23	0.0508	0.0762	4	1	1	5.06818	0.0402167
McAllister	0.00452967	1.41667	0.0254	999	849	0.000802	0.0024	0.0106	0.003175	0.23	0.0508	0.0762	4	1	1	4.94444	0.0359833
McAllister	0.00679873	1.25	0.0254	999	849	0.000802	0.0024	0.0106	0.003175	0.23	0.0508	0.0762	4	1	1	4.99254	0.03175
McAllister	0.00905087	1.08333	0.0254	999	849	0.000802	0.0024	0.0106	0.003175	0.23	0.0508	0.0762	4	1	1	5.00562	0.0275167
McAllister	0.00226907	1.41667	0.0254	999	849	0.000802	0.0024	0.0107	0.003175	0.23	0.0508	0.0762	4	1	1	5.02247	0.0359833
McAllister	0.00452967	1.08333	0.0254	999	849	0.000802	0.0024	0.0107	0.003175	0.23	0.0508	0.0762	4	1	1	4.94444	0.0275167
McAllister	0.00679873	0.916667	0.0254	999	849	0.000802	0.0024	0.0107	0.003175	0.23	0.0508	0.0762	4	1	1	4.99254	0.0232833
McAllister	0.00905087	0.75	0.0254	999	849	0.000802	0.0024	0.0107	0.003175	0.23	0.0508	0.0762	4	1	1	5.00562	0.01905
McAllister	0.00452967	1.08333	0.0254	999	849	0.000802	0.0024	0.0107	0.003175	0.23	0.0508	0.0762	4	1	1	4.94444	0.0275167
McAllister	0.00452967	1.08333	0.0254	999	849	0.000802	0.0024	0.0107	0.003175	0.23	0.0508	0.0762	4	1	1	1	0.0275167
McAllister	0.00452967	1.08333	0.0254	999	849	0.000802	0.0024	0.0107	0.003175	0.23	0.0508	0.0762	4	1	1	0.499439	0.0275167
McAllister	0.00226907	1.75	0.011176	999	849	0.000802	0.0024	0.0107	0.003175	0.23	0.0508	0.0762	4	1	1	5.02247	0.019558
McAllister	0.00452967	1.41667	0.011176	999	849	0.000802	0.0024	0.0107	0.003175	0.23	0.0508	0.0762	4	1	1	4.94444	0.0158327
McAllister	0.00679873	1.25	0.011176	999	849	0.000802	0.0024	0.0107	0.003175	0.23	0.0508	0.0762	4	1	1	4.99254	0.01397
McAllister	0.00905087	1.25	0.011176	999	849	0.000802	0.0024	0.0107	0.003175	0.23	0.0508	0.0762	4	1	1	5.00562	0.01397
McAllister	0.00226907	1.33333	0.0254	999	849	0.000802	0.0024	0.0107	0.003175	0.23	0.1016	0.0762	4	1	1	5.02247	0.0338667
McAllister	0.00452967	1.08333	0.0254	999	849	0.000802	0.0024	0.0107	0.003175	0.23	0.1016	0.0762	4	1	1	4.94444	0.0275167
McAllister	0.00679873	0.75	0.0254	999	849	0.000802	0.0024	0.0107	0.003175	0.23	0.1016	0.0762	4	1	1	4.99254	0.01905
McAllister	0.00905087	0.666667	0.0254	999	849	0.000802	0.0024	0.0107	0.003175	0.23	0.1016	0.0762	4	1	1	5.00562	0.0169333
McAllister	0.00226907	1.25	0.0254	999	849	0.000802	0.0024	0.0107	0.0047625	0.23	0.0508	0.0762	4	1	1	5.02247	0.03175
McAllister	0.00452967	1.08333	0.0254	999	849	0.000802	0.0024	0.0107	0.0047625	0.23	0.0508	0.0762	4	1	1	4.94444	0.0275167
McAllister	0.00679873	1.08333	0.0254	999	849	0.000802	0.0024	0.0107	0.0047625	0.23	0.0508	0.0762	4	1	1	4.99254	0.0275167
McAllister	0.00905087	0.916667	0.0254	999	849	0.000802	0.0024	0.0107	0.0047625	0.23	0.0508	0.0762	4	1	1	5.00562	0.0232833
McAllister	0.00226907	1.25	0.0254	999	849	0.000802	0.0024	0.0107	0.0015875	0.23	0.0508	0.0762	4	1	1	5.02247	0.03175
McAllister	0.00452967	1.08333	0.0254	999	849	0.000802	0.0024	0.0107	0.0015875	0.23	0.0508	0.0762	4	1	1	4.94444	0.0275167
McAllister	0.00679873	0.75	0.0254	999	849	0.000802	0.0024	0.0107	0.0015875	0.23	0.0508	0.0762	4	1	1	4.99254	0.01905
McAllister	0.00905087	0.75	0.0254	999	849	0.000802	0.0024	0.0107	0.0015875	0.23	0.0508	0.0762	4	1	1	5.00562	0.01905
McAllister	0.00226907	1.41667	0.0254	999	849	0.000802	0.0024	0.0107	0.003175	0.23	0.1016	0.0762	4	1	1	5.02247	0.0359833
McAllister	0.00452967	1.25	0.0254	999	849	0.000802	0.0024	0.0107	0.003175	0.23	0.1016	0.0762	4	1	1	4.94444	0.03175
McAllister	0.00679873	1.08333	0.0254	999	849	0.000802	0.0024	0.0107	0.003175	0.23	0.1016	0.0762	4	1	1	4.99254	0.0275167
McAllister	0.00905087	0.916667	0.0254	999	849	0.000802	0.0024	0.0107	0.003175	0.23	0.1016	0.0762	4	1	1	5.00562	0.0232833
McAllister	0.00226907	1.08333	0.011176	999	849	0.000802	0.0024	0.0107	0.003175	0.1	0.1016	0.0762	4	1	1	5.02247	0.0121073
McAllister	0.00452967	0.75	0.011176	999	849	0.000802	0.0024	0.0107	0.003175	0.1	0.1016	0.0762	4	1	1	4.94444	0.008382
McAllister	0.00679873	0.75	0.011176	999	849	0.000802	0.0024	0.0107	0.003175	0.1	0.1016	0.0762	4	1	1	4.99254	0.008382
McAllister	0.00905087	0.583333	0.011176	999	849	0.000802	0.0024	0.0107	0.003175	0.1	0.1016	0.0762	4	1	1	5.00562	0.00651933
McAllister	0.00226907	0.916667	0.0254	999	849	0.000802	0.0024	0.0107	0.003175	0.1	0.1016	0.0762	4	1	1	5.02247	0.0232833
McAllister	0.00452967	0.75	0.0254	999	849	0.000802	0.0024	0.0107	0.003175	0.1	0.1016	0.0762	4	1	1	4.94444	0.01905
McAllister	0.00226907	1.58333	0.0254	999	849	0.000802	0.0024	0.0107	0.003175	0.42	0.0508	0.0762	4	1	1	5.02247	0.0402167
McAllister	0.00452967	1.25	0.0254	998	849	0.000802	0.0024	0.0107	0.003175	0.42	0.0508	0.0762	4	1	1	4.94444	0.03175
McAllister	0.00679873	0.916667	0.0254	998	849	0.000802	0.0024	0.0107	0.003175	0.42	0.0508	0.0762	4	1	1	4.99254	0.0232833
McAllister	0.00905087	0.75	0.0254	998	849	0.000802	0.0024	0.0107	0.003175	0.42	0.0508	0.0762	4	1	1	5.00562	0.01905
McAllister	0.0050927	1.66667	0.0279908	998	684	0.00101	0.000411	0.0339	0.00200152	0.23	0.050038	0.040005	4	1	1	1.28707	0.0466513
McAllister	0.00429683	1.85	0.0279908	998	684	0.00101	0.000411	0.0339	0.00200152	0.23	0.050038	0.040005	4	1	1	1.07143	0.051783
McAllister	0.00358987	2.16667	0.0279908	998	684	0.00101	0.000411	0.0339	0.00200152	0.23	0.050038	0.040005	4	1	1	0.603025	0.0606467
McAllister	0.00342477	2.16667	0.0279908	998	684	0.00101	0.000411	0.0339	0.00200152	0.23	0.050038	0.040005	4	1	1	0.724947	0.0606467
McAllister	0.00314367	2.18333	0.0279908	998	684	0.00101	0.000411	0.0339	0.00200152	0.23	0.050038	0.040005	4	1	1	0.911946	0.0611132
McAllister	0.00298873	2.18333	0.0279908	998	684	0.00101	0.000411	0.0339	0.00200152	0.23	0.050038	0.040005	4	1	1	1.09123	0.0611132
McAllister	0.00274235	2.18333	0.0279908	998	684	0.00101	0.000411	0.0339	0.00200152	0.23	0.050038	0.040005	4	1	1	2.62304	0.0611132
McAllister	0.00218525	2.48333	0.0279908	998	684	0.00101	0.000411	0.0339	0.00200152	0.23	0.050038	0.040005	4	1	1	0.926119	0.0695105
McAllister	0.00241215	2.48333	0.0279908	998	684	0.00101	0.000411	0.0339	0.00200152	0.23	0.050038	0.040005	4	1	1	0.684802	0.0695105
McAllister	0.00184658	2.48333	0.0279908	998	684	0.00101	0.000411	0.0339	0.00200152	0.23	0.050038	0.040005	4	1	1	4.06032	0.0695105
McAllister	0.0013589	2.66667	0.0279908	998	684	0.00101	0.000411	0.0339	0.00200152	0.23	0.050038	0.040005	4	1	1	4.57292	0.0746421
McAllister	0.0018923	2.66667	0.0279908	998	684	0.00101	0.000411	0.0339	0.00200152	0.23	0.050038	0.040005	4	1	1	0.401254	0.0746421
McAllister	0.00162645	2.91667	0.0279908	998	684	0.00101	0.000411	0.0339	0.00200152	0.23	0.050038	0.040005	4	1	1	0.607531	0.0816398
McAllister	0.00121497	3.11667	0.0279908	998	684	0.00101	0.000411	0.0339	0.00200152	0.23	0.050038	0.040005	4	1	1	0.605145	0.087238
McAllister	0.00099822	3.18333	0.048006	998	684	0.00101	0.000411	0.0339	0.00200152	0.23	0.050038	0.040005	4	1	1	1.18738	0.152819
McAllister	0.00146727	3.18333	0.048006	998	684	0.00101	0.000411	0.0339	0.00200152	0.23	0.050038	0.040005	4	1	1	0.30497	0.152819
McAllister	0.00082804	3.36667	0.048006	998	684	0.00101	0.000411	0.0339	0.00200152	0.23	0.050038	0.040005	4	1	1	10.6429	0.16162
McAllister	0.00517652	1	0.048006	998	684	0.00101	0.000411	0.0339	0.00200152	0.23	0.050038	0.040005	4	1	1	1.16655	0.048006
McAllister	0.00500549	1.01667	0.048006	998	684	0.00101	0.000411	0.0339	0.00200152	0.23	0.050038	0.040005	4	1	1	1.13199	0.0488061
McAllister	0.00456692	1.08333	0.048006	998	684	0.00101	0.000411	0.0339	0.00200152	0.23	0.050038	0.040005	4	1	1	1.20073	0.0520065
McAllister	0.00441367	1.11667	0.048006	998	684	0.00101	0.000411	0.0339	0.00200152	0.23	0.050038	0.040005	4	1	1	1.06947	0.0536067
McAllister	0.00367199	1.16667	0.048006	998	684	0.00101	0.000411	0.0339	0.00200152	0.23	0.050038	0.040005	4	1	1	0.990363	0.056007
McAllister	0.00370078	1.18333	0.048006	998	684	0.00101	0.000411	0.0339	0.00200152	0.23	0.050038	0.040005	4	1	1	0.840421	0.0568071
McAllister	0.00401489	1.18333	0.048006	998	684	0.00101	0.000411	0.0339	0.00200152	0.23	0.050038	0.040005	4	1	1	0.768743	0.0568071
McAllister	0.00380577	1.18333	0.048006	998	684	0.00101	0.000411	0.0339	0.00200152	0.23	0.050038	0.040005	4	1	1	0.997778	0.0568071
McAllister	0.00364575	1.18333	0.048006	998	684	0.00101	0.000411	0.0339	0.00200152	0.23	0.050038	0.040005	4	1	1	1.33135	0.0568071
McAllister	0.00301921	1.33333	0.048006	998	684	0.00101	0.000411	0.0339	0.00200152	0.23	0.050038	0.040005	4	1	1	0.55246	0.064008
McAllister	0.00252561	1.33333	0.048006	998	684	0.00101	0.000411	0.0339	0.00200152	0.23	0.050038	0.040005	4	1	1	2.66462	0.064008
McAllister	0.00322241	1.33333	0.048006	998	684	0.00101	0.000411	0.0339	0.00200152	0.23	0.050038	0.040005	4	1	1	0.507924	0.064008
McAllister	0.00270849	1.33333	0.048006	998	684	0.00101	0.000411	0.0339	0.00200152	0.23	0.050038	0.040005	4	1	1	1.51099	0.064008
McAllister	0.00303699	1.35	0.048006	998	684	0.00101	0.000411	0.0339	0.00200152	0.23	0.050038	0.040005	4	1	1	0.832908	0.0648081
McAllister	0.00269494	1.35	0.048006	998	684	0.00101	0.000411	0.0339	0.00200152	0.23	0.050038	0.040005	4	1	1	1.29654	0.0648081
McAllister	0.00242062	1.35	0.048006	998	684	0.00101	0.000411	0.0339	0.00200152	0.23	0.050038	0.040005	4	1	1	2.09751	0.0648081
McAllister	0.00190415	1.45	0.048006	998	684	0.00101	0.000411	0.0339	0.00200152	0.23	0.050038	0.040005	4	1	1	3.1959	0.0696087
McAllister	0.00172805	1.45	0.048006	998	684	0.00101	0.000411	0.0339	0.00200152	0.23	0.050038	0.040005	4	1	1	2.5434	0.0696087
McAllister	0.00271357	1.45	0.048006	998	684	0.00101	0.000411	0.0339	0.00200152	0.23	0.050038	0.040005	4	1	1	0.317304	0.0696087
McAllister	0.00192701	1.45	0.048006	998	684	0.00101	0.000411	0.0339	0.00200152	0.23	0.050038	0.040005	4	1	1	3.35182	0.0696087
McAllister	0.00197104	1.45	0.048006	998	684	0.00101	0.000411	0.0339	0.00200152	0.23	0.050038	0.040005	4	1	1	1.40496	0.0696087
McAllister	0.00253577	1.45	0.048006	998	684	0.00101	0.000411	0.0339	0.00200152	0.23	0.050038	0.040005	4	1	1	0.506539	0.0696087
McAllister	0.00201591	1.48333	0.048006	998	684	0.00101	0.000411	0.0339	0.00200152	0.23	0.050038	0.040005	4	1	1	0.820336	0.0712089
McAllister	0.00168317	1.48333	0.048006	998	684	0.00101	0.000411	0.0339	0.00200152	0.23	0.050038	0.040005	4	1	1	3.66667	0.0712089
McAllister	0.00210397	1.48333	0.048006	998	684	0.00101	0.000411	0.0339	0.00200152	0.23	0.050038	0.040005	4	1	1	0.696246	0.0712089
McAllister	0.00248497	1.48333	0.048006	998	684	0.00101	0.000411	0.0339	0.00200152	0.23	0.050038	0.040005	4	1	1	0.296951	0.0712089
McAllister	0.00228092	1.48333	0.048006	998	684	0.00101	0.000411	0.0339	0.00200152	0.23	0.050038	0.040005	4	1	1	0.471327	0.0712089
McAllister	0.00141732	1.66667	0.048006	998	684	0.00101	0.000411	0.0339	0.00200152	0.23	0.050038	0.040005	4	1	1	1.38802	0.08001
McAllister	0.00152315	1.66667	0.048006	998	684	0.00101	0.000411	0.0339	0.00200152	0.23	0.050038	0.040005	4	1	1	0.74153	0.08001
McAllister	0.00179409	1.66667	0.048006	998	684	0.00101	0.000411	0.0339	0.00200152	0.23	0.050038	0.040005	4	1	1	0.373299	0.08001
McAllister	0.00100753	1.66667	0.048006	998	684	0.00101	0.000411	0.0339	0.00200152	0.23	0.050038	0.040005	4	1	1	12.0769	0.08001
McAllister	0.00114639	1.66667	0.048006	998	684	0.00101	0.000411	0.0339	0.00200152	0.23	0.050038	0.040005	4	1	1	9.91935	0.08001
McAllister	0.00121158	1.68333	0.048006	998	684	0.00101	0.000411	0.0339	0.00200152	0.23	0.050038	0.040005	4	1	1	6.1194	0.0808101
McAllister	0.00136229	1.83333	0.048006	998	684	0.00101	0.000411	0.0339	0.00200152	0.23	0.050038	0.040005	4	1	1	0.684817	0.088011
McAllister	0.00144018	1.85	0.048006	998	684	0.00101	0.000411	0.0339	0.00200152	0.23	0.050038	0.040005	4	1	1	1.88795	0.0888111
McAllister	0.00119549	1.85	0.048006	998	684	0.00101	0.000411	0.0339	0.00200152	0.23	0.050038	0.040005	4	1	1	2.72559	0.0888111
McAllister	0.00173821	2.05	0.048006	998	684	0.00101	0.000411	0.0339	0.00200152	0.23	0.050038	0.040005	4	1	1	0.226404	0.0984123
McAllister	0.00151045	2	0.048006	998	684	0.00101	0.000411	0.0339	0.00200152	0.23	0.050038	0.040005	4	1	1	0.654917	0.096012
McAllister	0.00149437	2	0.048006	998	684	0.00101	0.000411	0.0339	0.00200152	0.23	0.050038	0.040005	4	1	1	0.68738	0.096012
McAllister	0.00145034	2	0.048006	998	684	0.00101	0.000411	0.0339	0.00200152	0.23	0.050038	0.040005	4	1	1	0.984936	0.096012
McAllister	0.00119634	2.05	0.048006	998	684	0.00101	0.000411	0.0339	0.00200152	0.23	0.050038	0.040005	4	1	1	1.84306	0.0984123
McAllister	0.00111845	2.01667	0.048006	998	684	0.00101	0.000411	0.0339	0.0020066	0.23	0.050038	0.040005	4	1	1	2.26173	0.0968121
McAllister	0.000963507	2.2	0.048006	998	684	0.00101	0.000411	0.0339	0.0020066	0.23	0.050038	0.040005	4	1	1	1.48472	0.105613
McAllister	0.000958427	2.35	0.048006	998	684	0.00101	0.000411	0.0339	0.0020066	0.23	0.050038	0.040005	4	1	1	1.57859	0.112814
McAllister	0.00290153	1.21667	0.0569976	998	684	0.00101	0.000411	0.0339	0.0020066	0.23	0.050038	0.040005	4	1	1	0.431495	0.0693471
McAllister	0.00285801	1.16667	0.0569976	998	684	0.00101	0.000411	0.0339	0.0020066	0.23	0.050038	0.040005	4	1	1	0.639437	0.0664972
McAllister	0.00224621	1.18333	0.0569976	998	684	0.00101	0.000411	0.0339	0.0020066	0.23	0.050038	0.040005	4	1	1	2.47251	0.0674472
McAllister	0.00213275	1.5	0.0569976	998	684	0.00101	0.000411	0.0339	0.0020066	0.23	0.050038	0.040005	4	1	1	0.35067	0.0854964
McAllister	0.00172974	1.5	0.0569976	998	684	0.00101	0.000411	0.0339	0.0020066	0.23	0.050038	0.040005	4	1	1	0.609929	0.0854964
McAllister	0.00153924	1.5	0.0569976	998	684	0.00101	0.000411	0.0339	0.0020066	0.23	0.050038	0.040005	4	1	1	0.929936	0.0854964
McAllister	0.00143595	1.51667	0.0569976	998	684	0.00101	0.000411	0.0339	0.0020066	0.23	0.050038	0.040005	4	1	1	2.74393	0.0864464
McAllister	0.00119211	1.51667	0.0569976	998	684	0.00101	0.000411	0.0339	0.0020066	0.23	0.050038	0.040005	4	1	1	3.75676	0.0864464
McAllister	0.00165015	1.66667	0.0569976	998	684	0.00101	0.000411	0.0339	0.0020066	0.23	0.050038	0.040005	4	1	1	0.461019	0.094996
McAllister	0.00121751	1.66667	0.0569976	998	684	0.00101	0.000411	0.0339	0.0020066	0.23	0.050038	0.040005	4	1	1	0.964481	0.094996
McAllister	0.00115824	1.66667	0.0569976	998	684	0.00101	0.000411	0.0339	0.0020066	0.23	0.050038	0.040005	4	1	1	2.21127	0.094996
McAllister	0.00119803	2.18333	0.0569976	998	684	0.00101	0.000411	0.0339	0.0020066	0.23	0.050038	0.040005	4	1	1	0.533044	0.124445
McAllister	0.0009525	2.18333	0.0569976	998	684	0.00101	0.000411	0.0339	0.0020066	0.23	0.050038	0.040005	4	1	1	5.61765	0.124445
McAllister	0.00444077	0.75	0.070993	998	684	0.00101	0.000411	0.0339	0.0020066	0.23	0.050038	0.040005	4	1	1	1.10643	0.0532448
McAllister	0.00343747	0.833333	0.070993	998	684	0.00101	0.000411	0.0339	0.0020066	0.23	0.050038	0.040005	4	1	1	0.507053	0.0591608
McAllister	0.00333841	0.833333	0.070993	998	684	0.00101	0.000411	0.0339	0.0020066	0.23	0.050038	0.040005	4	1	1	0.883899	0.0591608
McAllister	0.00313351	0.883333	0.070993	998	684	0.00101	0.000411	0.0339	0.0020066	0.23	0.050038	0.040005	4	1	1	2.14444	0.0627105
McAllister	0.00305139	0.85	0.070993	998	684	0.00101	0.000411	0.0339	0.0020066	0.23	0.050038	0.040005	4	1	1	1.07843	0.060344
McAllister	0.00261366	0.9	0.070993	998	684	0.00101	0.000411	0.0339	0.0020066	0.23	0.050038	0.040005	4	1	1	3.06719	0.0638937
McAllister	0.00245195	0.916667	0.070993	998	684	0.00101	0.000411	0.0339	0.0020066	0.23	0.050038	0.040005	4	1	1	0.428712	0.0650769
McAllister	0.00238083	0.916667	0.070993	998	684	0.00101	0.000411	0.0339	0.0020066	0.23	0.050038	0.040005	4	1	1	1.55869	0.0650769
McAllister	0.00261366	1.13333	0.070993	998	684	0.00101	0.000411	0.0339	0.0020066	0.23	0.050038	0.040005	4	1	1	0.185939	0.0804587
McAllister	0.00238591	1.13333	0.070993	998	684	0.00101	0.000411	0.0339	0.0020066	0.23	0.050038	0.040005	4	1	1	0.368626	0.0804587
McAllister	0.0021971	1.13333	0.070993	998	684	0.00101	0.000411	0.0339	0.0020066	0.23	0.050038	0.040005	4	1	1	0.59496	0.0804587
McAllister	0.00163237	1.13333	0.070993	998	684	0.00101	0.000411	0.0339	0.0020066	0.23	0.050038	0.040005	4	1	1	2.13496	0.0804587
McAllister	0.00184065	1.51667	0.070993	998	684	0.00101	0.000411	0.0339	0.0020066	0.23	0.050038	0.040005	4	1	1	0.165684	0.107673
McAllister	0.00139107	1.51667	0.070993	998	684	0.00101	0.000411	0.0339	0.0020066	0.23	0.050038	0.040005	4	1	1	1.10641	0.107673
McAllister	0.00131064	1.53333	0.070993	998	684	0.00101	0.000411	0.0339	0.0020066	0.23	0.050038	0.040005	4	1	1	2.08367	0.108856
McAllister	0.0034417	0.75	0.08001	998	684	0.00101	0.000411	0.0339	0.00200152	0.23	0.050038	0.040005	4	1	1	0.63253	0.0600075
McAllister	0.00354415	0.75	0.08001	998	684	0.00101	0.000411	0.0339	0.00200152	0.23	0.050038	0.040005	4	1	1	0.839192	0.0600075
McAllister	0.00361611	0.75	0.08001	998	684	0.00101	0.000411	0.0339	0.00200152	0.23	0.050038	0.040005	4	1	1	1.09363	0.0600075
McAllister	0.00210481	0.9	0.08001	998	684	0.00101	0.000411	0.0339	0.00200152	0.23	0.050038	0.040005	4	1	1	1.02114	0.072009
McAllister	0.00248497	0.916667	0.08001	998	684	0.00101	0.000411	0.0339	0.00200152	0.23	0.050038	0.040005	4	1	1	0.472654	0.0733425
McAllister	0.0023876	0.916667	0.08001	998	684	0.00101	0.000411	0.0339	0.00200152	0.23	0.050038	0.040005	4	1	1	0.626298	0.0733425
McAllister	0.00221488	0.916667	0.08001	998	684	0.00101	0.000411	0.0339	0.00200152	0.23	0.050038	0.040005	4	1	1	0.785666	0.0733425
McAllister	0.00193379	1	0.08001	998	684	0.00101	0.000411	0.0339	0.00200152	0.23	0.050038	0.040005	4	1	1	0.906511	0.08001
McAllister	0.0018669	1	0.08001	998	684	0.00101	0.000411	0.0339	0.00200152	0.23	0.050038	0.040005	4	1	1	0.89433	0.08001
McAllister	0.00170942	1	0.08001	998	684	0.00101	0.000411	0.0339	0.00200152	0.23	0.050038	0.040005	4	1	1	1.65309	0.08001
McAllister	0.00155025	1	0.08001	998	684	0.00101	0.000411	0.0339	0.00200152	0.23	0.050038	0.040005	4	1	1	3.11461	0.08001
McAllister	0.00138684	1.08333	0.08001	998	684	0.00101	0.000411	0.0339	0.00200152	0.23	0.050038	0.040005	4	1	1	1.3103	0.0866775
McAllister	0.0012446	1.08333	0.08001	998	684	0.00101	0.000411	0.0339	0.00200152	0.23	0.050038	0.040005	4	1	1	2.96226	0.0866775
McAllister	0.00125815	1.18333	0.08001	998	684	0.00101	0.000411	0.0339	0.00200152	0.23	0.050038	0.040005	4	1	1	1.60702	0.0946785
McAllister	0.00112437	1.18333	0.08001	998	684	0.00101	0.000411	0.0339	0.00200152	0.23	0.050038	0.040005	4	1	1	2.02506	0.0946785
McAllister	0.00123529	1.18333	0.08001	998	684	0.00101	0.000411	0.0339	0.00200152	0.23	0.050038	0.040005	4	1	1	2.42488	0.0946785
McAllister	0.00116925	1.18333	0.08001	998	684	0.00101	0.000411	0.0339	0.00200152	0.23	0.050038	0.040005	4	1	1	3.89716	0.0946785
McAllister	0.00123952	1.25	0.08001	998	684	0.00101	0.000411	0.0339	0.00200152	0.23	0.050038	0.040005	4	1	1	1	0.100013
McAllister	0.00107865	1.25	0.08001	998	684	0.00101	0.000411	0.0339	0.00200152	0.23	0.050038	0.040005	4	1	1	1.548	0.100013
McAllister	0.00098552	1.25	0.08001	998	684	0.00101	0.000411	0.0339	0.00200152	0.23	0.050038	0.040005	4	1	1	3.23273	0.100013
McAllister	0.00119803	1.33333	0.08001	998	684	0.00101	0.000411	0.0339	0.00200152	0.23	0.050038	0.040005	4	1	1	0.859396	0.10668
McAllister	0.00106087	1.33333	0.08001	998	684	0.00101	0.000411	0.0339	0.00200152	0.23	0.050038	0.040005	4	1	1	2.10918	0.10668
McAllister	0.00102785	1.5	0.08001	998	684	0.00101	0.000411	0.0339	0.00200152	0.23	0.050038	0.040005	4	1	1	2.01241	0.120015
McAllister	0.00437303	1.76667	0.0127	1403	780	0.0222	0.00133	0.0189	0.0028194	0.23	0.0492252	0.0254508	4	1	1	0.108369	0.0224367
McAllister	0.00526203	1.48333	0.0127	1403	780	0.0222	0.00133	0.0189	0.0028194	0.23	0.0492252	0.0254508	4	1	1	0.333691	0.0188383
McAllister	0.00578697	1.23333	0.0127	1403	780	0.0222	0.00133	0.0189	0.0028194	0.23	0.0492252	0.0254508	4	1	1	0.466738	0.0156633
McAllister	0.00604943	0.866667	0.0127	1403	780	0.0222	0.00133	0.0189	0.0028194	0.23	0.0492252	0.0254508	4	1	1	0.533262	0.0110067
McAllister	0.0065786	0.833333	0.0127	1403	780	0.0222	0.00133	0.0189	0.0028194	0.23	0.0492252	0.0254508	4	1	1	0.667382	0.0105833
McAllister	0.00621453	0.633333	0.0127	1403	780	0.0222	0.00133	0.0189	0.0028194	0.23	0.0492252	0.0254508	4	1	1	0.575107	0.00804333
McAllister	0.00552704	0.533333	0.0127	1403	780	0.0222	0.00133	0.0189	0.0028194	0.23	0.0492252	0.0254508	4	1	1	0.400858	0.00677333
McAllister	0.00542713	0.5	0.0127	1403	780	0.0222	0.00133	0.0189	0.0028194	0.23	0.0492252	0.0254508	4	1	1	0.375536	0.00635
McAllister	0.00493437	2.15	0.00635	1403	780	0.0222	0.00133	0.0189	0.0028194	0.23	0.0492252	0.0254508	4	1	1	0.250644	0.0136525
McAllister	0.00536025	1.73333	0.00635	1403	780	0.0222	0.00133	0.0189	0.0028194	0.23	0.0492252	0.0254508	4	1	1	0.358584	0.0110067
McAllister	0.00552704	1.06667	0.00635	1403	780	0.0222	0.00133	0.0189	0.0028194	0.23	0.0492252	0.0254508	4	1	1	0.400858	0.00677333
McAllister	0.00496655	0.666667	0.00635	1403	780	0.0222	0.00133	0.0189	0.0028194	0.23	0.0492252	0.0254508	4	1	1	0.258798	0.00423333
McAllister	0.00483447	0.65	0.00635	1403	780	0.0222	0.00133	0.0189	0.0028194	0.23	0.0492252	0.0254508	4	1	1	0.225322	0.0041275
McAllister	0.00463635	0.566667	0.00635	1403	780	0.0222	0.00133	0.0189	0.0028194	0.23	0.0492252	0.0254508	4	1	1	0.175107	0.00359833
McAllister	0.00450427	0.416667	0.00635	1403	780	0.0222	0.00133	0.0189	0.0028194	0.23	0.0492252	0.0254508	4	1	1	0.141631	0.00264583
McAllister	0.0135805	1.9	0.0055372	994	803	0.000926	0.000605	0.0107	0.0021844	0.2	0.048133	0.0508	4	1	1	0.794183	0.0105207
McAllister	0.0108289	3.03333	0.0055372	994	803	0.000926	0.000605	0.0107	0.0021844	0.2	0.048133	0.0508	4	1	1	0.461714	0.0167962
McAllister	0.0081915	2.53333	0.0055372	994	803	0.000926	0.000605	0.0107	0.0021844	0.2	0.048133	0.0508	4	1	1	0.793327	0.0140276
McAllister	0.00419693	3.16667	0.0055372	994	803	0.000926	0.000605	0.0107	0.0021844	0.2	0.048133	0.0508	4	1	1	1.55252	0.0175345
McAllister	0.00698669	3.16667	0.0055372	994	803	0.000926	0.000605	0.0107	0.0021844	0.2	0.048133	0.0508	4	1	1	0.700742	0.0175345
McAllister	0.00982133	2.28333	0.0055372	994	803	0.000926	0.000605	0.0107	0.0021844	0.2	0.048133	0.0508	4	1	1	1.09386	0.0126433
McAllister	0.0141393	1.9	0.0055372	994	803	0.000926	0.000605	0.0107	0.0021844	0.2	0.048133	0.0508	4	1	1	0.899886	0.0105207
McAllister	0.00756497	3.66667	0.00635	994	803	0.000926	0.000605	0.0107	0.0021844	0.2	0.048133	0.0508	4	1	1	1.55651	0.0232833
McAllister	0.0135721	2.86667	0.00635	994	803	0.000926	0.000605	0.0107	0.0021844	0.2	0.048133	0.0508	4	1	1	0.793065	0.0182033
McAllister	0.00933873	3.41667	0.0055372	994	803	0.000926	0.000605	0.0107	0.0021844	0.2	0.048133	0.0508	4	1	1	1.04638	0.0189188
McAllister	0.01397	2.53333	0.0055372	994	803	0.000926	0.000605	0.0107	0.0021844	0.2	0.048133	0.0508	4	1	1	0.877133	0.0140276
McAllister	0.00435949	3.16667	0.0055372	1046	803	0.00217	0.000605	0.0076	0.0021844	0.2	0.048133	0.0508	4	1	1	0.514412	0.0175345
McAllister	0.00221996	3.48333	0.0055372	1046	803	0.00217	0.000605	0.0076	0.0021844	0.2	0.048133	0.0508	4	1	1	0.636704	0.0192879
McAllister	0.00711623	2.28333	0.0055372	1046	803	0.00217	0.000605	0.0076	0.0021844	0.2	0.048133	0.0508	4	1	1	1.88336	0.0126433
McAllister	0.0110998	1.9	0.0055372	1046	803	0.00217	0.000605	0.0076	0.0021844	0.2	0.048133	0.0508	4	1	1	0.927941	0.0105207
McAllister	0.00291846	2.78333	0.0055372	1073	803	0.00423	0.000605	0.006	0.0021844	0.2	0.048133	0.0508	4	1	1	0.774974	0.0154119
McAllister	0.00813647	1.9	0.0055372	1073	803	0.00423	0.000605	0.006	0.0021844	0.2	0.048133	0.0508	4	1	1	0.90297	0.0105207
McAllister	0.00147997	3.93333	0.0055372	1073	803	0.00423	0.000605	0.006	0.0021844	0.2	0.048133	0.0508	4	1	1	1	0.0217797
McAllister	0.0094996	1.51667	0.0055372	1073	803	0.00423	0.000605	0.006	0.0021844	0.2	0.048133	0.0508	4	1	1	1.12098	0.00839809
McAllister	0.00121666	2.15	0.0055372	1092	803	0.00785	0.000605	0.0037	0.0021844	0.2	0.048133	0.0508	4	1	1	1.24181	0.011905
McAllister	0.00065786	3.58333	0.0055372	1092	803	0.00785	0.000605	0.0037	0.0021844	0.2	0.048133	0.0508	4	1	1	1.16435	0.0198416
McAllister	0.00167809	1.64667	0.0055372	1092	803	0.00785	0.000605	0.0037	0.0021844	0.2	0.048133	0.0508	4	1	1	0.889418	0.00911792
McAllister	0.00222081	1.01667	0.0055372	1092	803	0.00785	0.000605	0.0037	0.0021844	0.2	0.048133	0.0508	4	1	1	1.34615	0.00562949
McAllister	0.00444077	3.3	0.0055372	994	892	0.000926	0.00055	0.028	0.0021844	0.2	0.048133	0.0508	4	1	1	0.964419	0.0182728
McAllister	0.00949537	2.15	0.0055372	994	892	0.000926	0.00055	0.028	0.0021844	0.2	0.048133	0.0508	4	1	1	0.894426	0.011905
McAllister	0.0034544	3.93333	0.0055372	994	892	0.000926	0.00055	0.028	0.0021844	0.2	0.048133	0.0508	4	1	1	1	0.0217797
McAllister	0.0105579	1.16667	0.0254	1275	765	0.003425	0.00142	0.0165	0.003175	0.23	0.0508	0.048768	4	1	1	0.300313	0.0296333
McAllister	0.00752687	1.5	0.0254	1275	765	0.003425	0.00142	0.0165	0.003175	0.23	0.0508	0.048768	4	1	1	0.299708	0.0381
McAllister	0.0069596	1.16667	0.0254	1275	765	0.003425	0.00142	0.0165	0.003175	0.23	0.0508	0.048768	4	1	1	1	0.0296333
McAllister	0.00452967	1.16667	0.0254	1275	765	0.003425	0.00142	0.0165	0.003175	0.23	0.0508	0.048768	4	1	1	2.00056	0.0296333
McAllister	0.00324781	1.16667	0.0254	1206	765	0.003425	0.00142	0.0165	0.003175	0.23	0.0508	0.048768	4	1	1	3	0.0296333
McAllister	0.00509693	0.833333	0.0254	1206	765	0.003425	0.00142	0.0165	0.003175	0.23	0.0508	0.048768	4	1	1	2.99734	0.0211667
McAllister	0.0107527	1.16667	0.0254	1206	765	0.003425	0.00142	0.0165	0.003175	0.23	0.0508	0.048768	4	1	1	0.30123	0.0296333
McAllister	0.00595884	1.5	0.0254	1206	813	0.00138	0.00176	0.0138	0.003175	0.23	0.0508	0.0508	4	1	1	0.02	0.0381
McAllister	0.0140589	1.16667	0.0254	1206	813	0.00138	0.00176	0.0138	0.003175	0.23	0.0508	0.0508	4	1	1	0.0199631	0.0296333
McAllister	0.0272457	0.833333	0.0254	1206	813	0.00138	0.00176	0.0138	0.003175	0.23	0.0508	0.0508	4	1	1	0.0199683	0.0211667
McAllister	0.0357556	0.583333	0.0254	1206	813	0.00138	0.00176	0.0138	0.003175	0.23	0.0508	0.0508	4	1	1	0.0200725	0.0148167
McAllister	0.0143493	1.16667	0.0254	1206	813	0.00138	0.00176	0.0138	0.003175	0.23	0.0508	0.0508	4	1	1	0.0100119	0.0296333
McAllister	0.0122809	1.16667	0.0254	1210	819	0.00139	0.00176	0.0138	0.003175	0.23	0.0508	0.0508	4	1	1	0.200745	0.0296333
McAllister	0.00330962	1.5	0.015748	1360	925	0.00505	0.00312	0.0149	0.001143	0.21	0.0258826	0.0315722	4	1	1	0.521012	0.023622
McAllister	0.00874607	0.7	0.015748	1360	925	0.00505	0.00312	0.0149	0.003175	0.21	0.0258826	0.0315722	4	1	1	0.477825	0.0110236
McAllister	0.0117179	1.11667	0.015748	1360	925	0.00505	0.00312	0.0149	0.003175	0.21	0.0258826	0.0315722	4	1	1	0.346304	0.0175853
McAllister	0.00870373	1.5	0.015748	1360	925	0.00505	0.00312	0.0149	0.003175	0.21	0.0258826	0.0315722	4	1	1	0.352632	0.023622
McAllister	0.0130641	0.833333	0.0254	1168	820	0.00221	0.00327	0.0094	0.003175	0.23	0.0508	0.0508	4	1	1	0.199844	0.0211667
McAllister	0.00646853	1.16667	0.0254	1168	820	0.00221	0.00327	0.0094	0.003175	0.23	0.0508	0.0508	4	1	1	0.199372	0.0296333
McAllister	0.0110067	0.833333	0.0254	1168	820	0.00221	0.00327	0.0094	0.003175	0.23	0.0508	0.0508	4	1	1	0.200369	0.0211667
McAllister	0.00506307	1.16667	0.0254	1168	820	0.00221	0.00327	0.0094	0.003175	0.23	0.0508	0.0508	4	1	1	0.200803	0.0296333
McAllister	0.004953	0.833333	0.0254	997	820	0.00092	0.00327	0.0136	0.003175	0.23	0.0508	0.0508	4	1	1	4.96939	0.0211667
McAllister	0.0029718	1.16667	0.0254	997	820	0.00092	0.00327	0.0126	0.00271018	0.23	0.0508	0.0508	4	1	1	4.94915	0.0296333
McAllister	0.00814493	0.833333	0.0254	1003	820	0.00092	0.00327	0.0202	0.00271018	0.23	0.0508	0.0508	4	1	1	10.0575	0.0211667
McAllister	0.00498687	1.16667	0.0254	1003	820	0.00092	0.00327	0.0202	0.00079502	0.23	0.0508	0.0508	4	1	1	9.90741	0.0296333
McAllister	0.00315807	0.875	0.0635	1092	807	0.00146	0.000637	0.0082	0.00079502	0.288	0.0381	0.0381	2	1	4	1.36076	0.0555625
McAllister	0.00353907	0.75	0.0762	1092	807	0.00146	0.000637	0.0082	0.00079502	0.288	0.0381	0.0381	2	1	4	1	0.05715
McAllister	0.0033782	2.33333	0.0127	1002	807	0.001	0.000637	0.0107	0.00079502	0.23	0.024892	0.0508	2	1	4	1.57419	0.0296333
McAllister	0.0033782	2	0.01905	1002	807	0.00101	0.000637	0.0106	0.00079502	0.23	0.024892	0.0508	2	1	4	1.57419	0.0381
McAllister	0.0033782	1.33333	0.028575	1002	807	0.00101	0.000637	0.0106	0.00079502	0.23	0.024892	0.0508	2	1	4	1.57419	0.0381
McAllister	0.00539327	2.3	0.0127	1003	807	0.00103	0.000637	0.0103	0.00079502	0.23	0.024892	0.0508	2	1	4	1.56855	0.02921
McAllister	0.00539327	1.95	0.01905	1002	807	0.001005	0.000637	0.0107	0.00079502	0.23	0.024892	0.0508	2	1	4	1.56855	0.0371475
McAllister	0.00539327	1.23333	0.003175	1002	807	0.001005	0.000637	0.0106	0.00079502	0.23	0.024892	0.0508	2	1	4	1.56855	0.00391583
McAllister	0.0081026	0.916667	0.0127	1002	807	0.00102	0.000637	0.0105	0.00079502	0.23	0.024892	0.0508	2	1	4	1.57258	0.0116417
McAllister	0.0081026	0.916667	0.01905	1002	807	0.001005	0.000637	0.0107	0.00079502	0.23	0.024892	0.0508	2	1	4	1.57258	0.0174625
McAllister	0.0081026	0.916667	0.003175	1002	807	0.001005	0.000637	0.0107	0.00079502	0.23	0.024892	0.0508	2	1	4	1.57258	0.00291042
McAllister	0.0108035	0.666667	0.0127	1003	807	0.001025	0.000637	0.0104	0.00079502	0.23	0.024892	0.0508	2	1	4	1.57258	0.00846667
McAllister	0.0108035	0.733333	0.01905	1003	807	0.001025	0.000637	0.0104	0.00079502	0.23	0.024892	0.0508	2	1	4	1.57258	0.01397
McAllister	0.0108035	0.733333	0.003175	1002	807	0.001002	0.000637	0.0107	0.00079502	0.23	0.024892	0.0508	2	1	4	1.57258	0.00232833
McAllister	0.0081026	0.25	0.01905	1002	807	0.00101	0.000637	0.0106	0.00079502	0.23	0.024892	0.0508	2	1	1	1.57258	0.0047625
McAllister	0.0113115	1.83333	0.0127	1079	1411	0.00109	0.0014	0.0172	0.003175	0.23	0.0508	0.0762	2	1	1	2.00225	0.0232833
McAllister	0.0181102	1.5	0.0127	1079	1411	0.00109	0.0014	0.0172	0.003175	0.23	0.0508	0.0762	2	1	1	2.00844	0.01905
McAllister	0.0058928	1.33333	0.0254	1079	1411	0.00109	0.0014	0.0172	0.003175	0.23	0.0508	0.0762	2	1	1	1.98712	0.0338667
McAllister	0.013589	1.25	0.0254	1079	1411	0.00109	0.0014	0.0172	0.003175	0.23	0.0508	0.0762	2	1	1	2	0.03175
McAllister	0.0141478	0.776667	0.0381	1079	1411	0.00109	0.0014	0.0172	0.003175	0.23	0.0508	0.0762	2	1	1	2.0054	0.029591
McAllister	0.0217424	0.71	0.0381	1079	1411	0.00109	0.0014	0.0172	0.003175	0.23	0.0508	0.0762	2	1	1	2	0.027051
McAllister	0.00486833	2.66667	0.0109982	1002	845	0.00103	0.00213	0.0101	0.00299974	0.23	0.0499872	0.040005	1	1	1	0.474359	0.0293285
McAllister	0.00386927	2.75	0.0109982	1002	845	0.00103	0.00213	0.0101	0.00299974	0.23	0.0499872	0.040005	1	1	1	0.464744	0.030245
McAllister	0.0029464	2.83333	0.0109982	1002	845	0.00103	0.00213	0.0101	0.00299974	0.23	0.0499872	0.040005	1	1	1	0.5	0.0311616
McAllister	0.00259927	3	0.0109982	1002	845	0.00103	0.00213	0.0101	0.00299974	0.23	0.0499872	0.040005	1	1	1	0.504902	0.0329946
McAllister	0.00199813	4	0.0109982	1002	845	0.00103	0.00213	0.0101	0.00299974	0.23	0.0499872	0.040005	1	1	1	0.503185	0.0439928
McAllister	0.00209973	4	0.0109982	1002	845	0.00103	0.00213	0.0101	0.00299974	0.23	0.0499872	0.040005	1	1	1	0.50303	0.0439928
McAllister	0.00199813	4.5	0.0109982	1002	845	0.00103	0.00213	0.0101	0.00299974	0.23	0.0499872	0.040005	1	1	1	0.503185	0.0494919
McAllister	0.005207	1.1	0.040005	1002	845	0.00103	0.00213	0.0101	0.00199644	0.23	0.0499872	0.040005	1	1	1	0.5	0.0440055
McAllister	0.00390313	1.16667	0.040005	1002	845	0.00103	0.00213	0.0101	0.00199644	0.23	0.0499872	0.040005	1	1	1	0.501629	0.0466725
McAllister	0.00260773	1.25	0.040005	1002	845	0.00103	0.00213	0.0101	0.00199644	0.23	0.0499872	0.040005	1	1	1	0.495146	0.0500063
McAllister	0.00260773	1.41667	0.040005	1002	845	0.00103	0.00213	0.0101	0.00199644	0.23	0.0499872	0.040005	1	1	1	1.99029	0.0566738
McAllister	0.00194733	4.55	0.0100076	1002	845	0.00103	0.00213	0.0101	0.00199644	0.23	0.0499872	0.040005	1	1	1	0.493506	0.0455346
McAllister	0.00260773	5.16667	0.0100076	1002	845	0.00103	0.00213	0.0101	0.00199644	0.23	0.0499872	0.040005	1	1	1	0.495146	0.0517059
McAllister	0.005207	4.55	0.0100076	1002	845	0.00103	0.00213	0.0101	0.00199644	0.23	0.0499872	0.040005	1	1	1	0.5	0.0455346
McAllister	0.00263313	3.08333	0.0199898	1002	845	0.00103	0.00213	0.0101	0.00199644	0.23	0.0499872	0.040005	1	1	1	1.01948	0.0616352
McAllister	0.00374227	3	0.0199898	1002	845	0.00103	0.00213	0.0101	0.00199644	0.23	0.0499872	0.040005	1	1	1	1.14563	0.0599694
McAllister	0.00613833	2.66667	0.0199898	1002	845	0.00103	0.00213	0.0101	0.00199644	0.23	0.0499872	0.040005	1	1	1	0.768293	0.0533061
McAllister	0.00133773	1.11667	0.040005	1000	851	0.001	0.00214	0.01	0.00299974	0.23	0.0499872	0.040005	1	1	1	1	0.0446722
McAllister	0.0029972	0.826667	0.040005	1000	851	0.001	0.00214	0.01	0.00299974	0.23	0.0499872	0.040005	1	1	1	2	0.0330708
McAllister	0.00400473	0.725	0.040005	1000	851	0.001	0.00214	0.01	0.00299974	0.23	0.0499872	0.040005	1	1	1	1.99367	0.0290036
McAllister	0.00199813	1.15667	0.040005	1000	843	0.001	0.00201	0.0101	0.00299974	0.23	0.0499872	0.040005	1	1	1	0.503185	0.0462724
McAllister	0.0029972	0.926667	0.040005	1000	843	0.001	0.00201	0.0101	0.00299974	0.23	0.0499872	0.040005	1	1	1	0.5	0.0370713
McAllister	0.00400473	0.826667	0.040005	1000	843	0.001	0.00201	0.0101	0.00299974	0.23	0.0499872	0.040005	1	1	1	0.501587	0.0330708
McAllister	0.0050038	0.798333	0.040005	1000	843	0.001	0.00201	0.0101	0.00299974	0.23	0.0499872	0.040005	1	1	1	0.5	0.0319373
McAllister	0.00600287	0.666667	0.040005	1000	843	0.001	0.00201	0.0101	0.00299974	0.23	0.0499872	0.040005	1	1	1	0.502119	0.02667
McAllister	0.00399627	1.58333	0.040005	1000	778	0.001	0.00163	0.0241	0.00299974	0.23	0.0499872	0.040005	2	1	1	8.07692	0.0633413
McAllister	0.0043688	1.55	0.040005	1000	778	0.001	0.00163	0.0241	0.00299974	0.23	0.0499872	0.040005	2	1	1	8.05263	0.0620078
McAllister	0.0085852	3.83333	0.0109982	1000	778	0.001	0.00163	0.0241	0.00299974	0.23	0.0499872	0.040005	1	1	1	0.5	0.0421598
McAllister	0.0106934	3.58333	0.0109982	1000	778	0.001	0.00163	0.0241	0.00299974	0.23	0.0499872	0.040005	1	1	1	0.5	0.0394102
McAllister	0.0126746	3.33333	0.0109982	1000	778	0.001	0.00163	0.0241	0.00299974	0.23	0.0499872	0.040005	1	1	1	0.5	0.0366607
McAllister	0.013716	3.16667	0.0109982	1000	778	0.001	0.00163	0.0241	0.00299974	0.23	0.0499872	0.040005	2	1	1	0.5	0.0348276
McAllister	0.0148844	3	0.0109982	1000	778	0.001	0.00163	0.0241	0.00299974	0.23	0.0499872	0.040005	2	1	1	0.5	0.0329946
McAllister	0.0025146	1.75	0.040005	1000	801	0.001	0.00168	0.0113	0.00299974	0.23	0.0499872	0.040005	2	1	1	4.0339	0.0700087
McAllister	0.00313267	1.66667	0.040005	1000	801	0.001	0.00168	0.0113	0.00299974	0.23	0.0499872	0.040005	2	1	1	4	0.066675
McAllister	0.004445	1.58333	0.040005	1000	801	0.001	0.00168	0.0113	0.00299974	0.23	0.0499872	0.040005	2	1	1	4	0.0633413
McAllister	0.00554567	1.55	0.040005	1000	801	0.001	0.00168	0.0113	0.00299974	0.23	0.0499872	0.040005	2	1	1	4	0.0620078
McAllister	0.004318	3.83333	0.0109982	1000	801	0.001	0.00168	0.0113	0.00299974	0.23	0.0499872	0.040005	1	1	1	0.5	0.0421598
McAllister	0.0059182	3.58333	0.0109982	1000	801	0.001	0.00168	0.0113	0.00299974	0.23	0.0499872	0.040005	1	1	1	0.5	0.0394102
McAllister	0.007366	3.33333	0.0109982	1000	801	0.001	0.00168	0.0113	0.00299974	0.23	0.0499872	0.040005	1	1	1	0.5	0.0366607
McAllister	0.0081788	3.16667	0.0109982	1000	801	0.001	0.00168	0.0113	0.00299974	0.23	0.0499872	0.040005	2	1	1	0.5	0.0348276
McAllister	0.009398	3	0.0109982	1000	801	0.001	0.00168	0.0113	0.00299974	0.23	0.0499872	0.040005	2	1	1	0.5	0.0329946
McAllister	0.00189653	1.75	0.040005	1000	820	0.001	0.00183	0.0105	0.00299974	0.23	0.0499872	0.040005	2	1	1	2.67213	0.0700087
McAllister	0.00214207	1.66667	0.040005	1000	820	0.001	0.00183	0.0105	0.00299974	0.23	0.0499872	0.040005	2	1	1	2.66667	0.066675
McAllister	0.00311573	1.58333	0.040005	1000	820	0.001	0.00183	0.0105	0.00299974	0.23	0.0499872	0.040005	2	1	1	2.68	0.0633413
McAllister	0.00407247	1.55	0.040005	1000	820	0.001	0.00183	0.0105	0.00299974	0.23	0.0499872	0.040005	2	1	1	2.67176	0.0620078
McAllister	0.0028702	3.83333	0.0109982	1000	820	0.001	0.00183	0.0105	0.00299974	0.23	0.0499872	0.040005	1	1	1	0.5	0.0421598
McAllister	0.0037084	3.58333	0.0109982	1000	820	0.001	0.00183	0.0105	0.00299974	0.23	0.0499872	0.040005	1	1	1	0.5	0.0394102
McAllister	0.0048768	3.33333	0.0109982	1000	820	0.001	0.00183	0.0105	0.00299974	0.23	0.0499872	0.040005	2	1	1	0.5	0.0366607
McAllister	0.0057404	3.16667	0.0109982	1000	820	0.001	0.00183	0.0105	0.00299974	0.23	0.0499872	0.040005	2	1	1	0.5	0.0348276
McAllister	0.0066548	3	0.0109982	1000	820	0.001	0.00183	0.0105	0.00299974	0.23	0.0499872	0.040005	2	1	1	0.5	0.0329946
McAllister	0.0014986	1.75	0.040005	1000	842	0.001	0.00214	0.0105	0.00299974	0.23	0.0499872	0.040005	2	1	1	2	0.0700087
McAllister	0.00166793	1.66667	0.040005	1000	842	0.001	0.00214	0.0105	0.00299974	0.23	0.0499872	0.040005	2	1	1	1.98485	0.066675
McAllister	0.0022352	1.58333	0.040005	1000	842	0.001	0.00214	0.0105	0.00299974	0.23	0.0499872	0.040005	2	1	1	2.03448	0.0633413
McAllister	0.0027432	1.55	0.040005	1000	842	0.001	0.00214	0.0105	0.00299974	0.23	0.0499872	0.040005	2	1	1	2	0.0620078
McAllister	0.00214207	3.83333	0.0109982	1000	842	0.001	0.00214	0.0105	0.00299974	0.23	0.0499872	0.040005	1	1	1	0.497041	0.0421598
McAllister	0.00232833	3.58333	0.0109982	1000	842	0.001	0.00214	0.0105	0.00299974	0.23	0.0499872	0.040005	1	1	1	0.502732	0.0394102
McAllister	0.0027178	3.33333	0.0109982	1000	842	0.001	0.00214	0.0105	0.00299974	0.23	0.0499872	0.040005	2	1	1	0.5	0.0366607
McAllister	0.002921	3.16667	0.0109982	1000	842	0.001	0.00214	0.0105	0.00299974	0.23	0.0499872	0.040005	2	1	1	0.5	0.0348276
McAllister	0.0031496	3	0.0109982	1000	842	0.001	0.00214	0.0105	0.00299974	0.23	0.0499872	0.040005	2	1	1	0.5	0.0329946
McAllister	0.0004826	1.58333	0.040005	1000	890	0.001	0.00275	0.01	0.00299974	0.23	0.0499872	0.040005	2	1	1	1.85	0.0633413
McAllister	0.000592667	1.55	0.040005	1000	890	0.001	0.00275	0.01	0.00299974	0.23	0.0499872	0.040005	2	1	1	1.33333	0.0620078
McAllister	0.0020828	1.33333	0.02032	1077	919	0.00139	0.00279	0.0104	0.003175	0.23	0.0508	0.048768	2	1	1	2.23684	0.0270933
McAllister	0.0027432	1.16667	0.02032	1077	919	0.00139	0.00279	0.0104	0.003175	0.23	0.0508	0.048768	2	1	1	2.24	0.0237067
McAllister	0.00351367	1	0.00762	1077	919	0.00139	0.00279	0.0104	0.003175	0.23	0.0508	0.048768	2	1	1	2.21705	0.00762
McAllister	0.00428413	0.833333	0.02032	1077	919	0.00139	0.00279	0.0104	0.003175	0.23	0.0508	0.048768	2	1	1	2.20253	0.0169333
McAllister	0.00339513	0.583333	0.02032	1077	919	0.00139	0.00279	0.0104	0.003175	0.23	0.0508	0.048768	2	1	1	2.23387	0.0118533
McAllister	0.002794	1.33333	0.02032	1077	919	0.00139	0.00279	0.0104	0.003175	0.23	0.0508	0.048768	2	1	1	2.75	0.0270933
McAllister	0.00364913	1	0.02032	1077	919	0.00139	0.00279	0.0104	0.003175	0.23	0.0508	0.048768	2	1	1	2.74783	0.02032
McAllister	0.00409787	0.583333	0.02032	1077	919	0.00139	0.00279	0.0104	0.003175	0.23	0.0508	0.048768	2	1	1	2.72308	0.0118533
McAllister	0.00364067	1.33333	0.02032	1077	919	0.00139	0.00279	0.0104	0.003175	0.23	0.0508	0.048768	2	1	1	2.49593	0.0270933
McAllister	0.00481753	1	0.02032	1077	919	0.00139	0.00279	0.0104	0.003175	0.23	0.0508	0.048768	2	1	1	2.46951	0.02032
McAllister	0.0057658	0.833333	0.02032	1077	919	0.00139	0.00279	0.0104	0.003175	0.23	0.0508	0.048768	2	1	1	2.49231	0.0169333
McAllister	0.0059436	0.666667	0.02032	1077	919	0.00139	0.00279	0.0104	0.003175	0.23	0.0508	0.048768	2	1	1	2.49254	0.0135467
McAllister	0.0035052	1.33333	0.02032	1077	919	0.00139	0.00279	0.0104	0.003175	0.23	0.0508	0.048768	2	1	1	2.47899	0.0270933
McAllister	0.00613833	0.833333	0.02032	1077	919	0.00139	0.00279	0.0104	0.003175	0.23	0.0508	0.048768	2	1	1	2.50242	0.0169333
McAllister	0.0043688	1.33333	0.02032	1077	845	0.00139	0.00212	0.0093	0.003175	0.23	0.0508	0.048768	2	1	1	2.5102	0.0270933
McAllister	0.0050292	1.16667	0.02032	1077	845	0.00139	0.00212	0.0093	0.003175	0.23	0.0508	0.048768	2	1	1	2.49412	0.0237067
McAllister	0.0061722	1	0.02032	1077	845	0.00139	0.00212	0.0093	0.003175	0.23	0.0508	0.048768	2	1	1	2.48804	0.02032
McAllister	0.00745067	0.833333	0.02032	1077	845	0.00139	0.00212	0.0093	0.003175	0.23	0.0508	0.048768	2	1	1	2.50598	0.0169333
McAllister	0.0030226	1.33333	0.02032	1104	925	0.00162	0.00283	0.01	0.003175	0.23	0.0508	0.048768	2	1	1	2.5	0.0270933
McAllister	0.0121835	1.16667	0.02032	1104	925	0.00162	0.00283	0.01	0.003175	0.23	0.0508	0.048768	2	1	1	0.277975	0.0237067
McAllister	0.00455507	1	0.02032	1104	925	0.00162	0.00283	0.01	0.003175	0.23	0.0508	0.048768	2	1	1	2.49351	0.02032
McAllister	0.00542713	0.833333	0.02032	1104	925	0.00162	0.00283	0.01	0.003175	0.23	0.0508	0.048768	2	1	1	2.44624	0.0169333
McAllister	0.00613833	0.666667	0.02032	1104	925	0.00162	0.00283	0.01	0.003175	0.23	0.0508	0.048768	2	1	1	2.50242	0.0135467
McAllister	0.00212513	1.33333	0.02032	1104	925	0.00162	0.00283	0.01	0.003175	0.23	0.0508	0.048768	2	1	1	2.21795	0.0270933
McAllister	0.00310727	1.16667	0.02032	1104	925	0.00162	0.00283	0.01	0.003175	0.23	0.0508	0.048768	2	1	1	2.2193	0.0237067
McAllister	0.00367453	1	0.02032	1104	925	0.00162	0.00283	0.01	0.003175	0.23	0.0508	0.048768	2	1	1	2.21481	0.02032
McAllister	0.00410633	0.833333	0.02032	1104	925	0.00162	0.00283	0.01	0.003175	0.23	0.0508	0.048768	2	1	1	2.21192	0.0169333
McAllister	0.00423333	0.666667	0.02032	1104	925	0.00162	0.00283	0.01	0.003175	0.23	0.0508	0.048768	2	1	1	2.22581	0.0135467
McAllister	0.00813647	0.833333	0.02032	1072	840	0.0012	0.00152	0.0098	0.003175	0.23	0.0508	0.048768	2	1	1	2.49455	0.0169333
McAllister	0.005969	1	0.02032	1072	840	0.0012	0.00152	0.0098	0.003175	0.23	0.0508	0.048768	2	1	1	2.50746	0.02032
McAllister	0.0043688	1.16667	0.02032	1072	840	0.0012	0.00152	0.0098	0.003175	0.23	0.0508	0.048768	2	1	1	2.48649	0.0237067
McAllister	0.00753533	0.833333	0.02032	1061	840	0.00117	0.00152	0.0102	0.003175	0.23	0.0508	0.048768	2	1	1	2.4902	0.0169333
McAllister	0.0061722	1	0.02032	1061	840	0.00117	0.00152	0.0102	0.003175	0.23	0.0508	0.048768	2	1	1	2.48804	0.02032
McAllister	0.0050292	1.16667	0.02032	1061	840	0.00117	0.00152	0.0102	0.003175	0.23	0.0508	0.048768	2	1	1	2.49412	0.0237067
McAllister	0.00407247	1.33333	0.02032	1061	840	0.00117	0.00152	0.0102	0.003175	0.23	0.0508	0.048768	2	1	1	2.51095	0.0270933
McAllister	0.012446	0.55	0.0254	1244	794	0.00306	0.00127	0.0208	0.003175	0.23	0.0508	0.048768	2	1	1	1	0.01397
McAllister	0.0113284	0.641667	0.0254	1244	794	0.00306	0.00127	0.0208	0.003175	0.23	0.0508	0.048768	2	1	1	1	0.0162983
McAllister	0.00821267	0.833333	0.0254	1244	794	0.00306	0.00127	0.0208	0.003175	0.23	0.0508	0.048768	2	1	1	1	0.0211667
McAllister	0.007366	1	0.0254	1244	794	0.00306	0.00127	0.0208	0.003175	0.23	0.0508	0.048768	2	1	1	1	0.0254
McAllister	0.00567267	1.16667	0.0254	1244	794	0.00306	0.00127	0.0208	0.003175	0.23	0.0508	0.048768	2	1	1	1	0.0296333
McAllister	0.00397933	1.33333	0.0254	1244	794	0.00306	0.00127	0.0208	0.003175	0.23	0.0508	0.048768	2	1	1	1	0.0338667
McAllister	0.0135636	0.666667	0.0254	1000	794	0.000961	0.00127	0.0208	0.003175	0.23	0.0508	0.048768	1	1	1	2.4902	0.0169333
McAllister	0.0101769	0.916667	0.0254	1000	794	0.000961	0.00127	0.0208	0.003175	0.23	0.0508	0.048768	1	1	1	2.49419	0.0232833
McAllister	0.00679027	1.16667	0.0254	1000	794	0.000961	0.00127	0.0208	0.003175	0.23	0.0508	0.048768	1	1	1	2.50218	0.0296333
McAllister	0.00339513	1.33333	0.0254	1000	794	0.000961	0.00127	0.0208	0.003175	0.23	0.0508	0.048768	1	1	1	2.48696	0.0338667
McAllister	0.00452967	1.73333	0.0254	1195	802	0.00196	0.0013	0.016	0.003175	0.23	0.0508	0.0508	2	1	1	0.333832	0.0440267
McAllister	0.00905933	1.41667	0.0254	1195	802	0.00196	0.0013	0.016	0.003175	0.23	0.0508	0.0508	2	1	1	0.334165	0.0359833
McAllister	0.012446	1.08333	0.0254	1195	802	0.00196	0.0013	0.016	0.003175	0.23	0.0508	0.0508	2	1	1	0.333938	0.0275167
McAllister	0.0135721	0.916667	0.0254	1195	802	0.00196	0.0013	0.016	0.003175	0.23	0.0508	0.0508	2	1	1	0.333611	0.0232833
McAllister	0.00452967	1.5	0.0254	1195	802	0.00196	0.0013	0.016	0.003175	0.23	0.0508	0.0508	2	1	1	0.499439	0.0381
McAllister	0.0113284	1.16667	0.0254	1195	802	0.00196	0.0013	0.016	0.003175	0.23	0.0508	0.0508	2	1	1	0.49832	0.0296333
McAllister	0.0135721	0.833333	0.0254	1195	802	0.00196	0.0013	0.016	0.003175	0.23	0.0508	0.0508	2	1	1	0.500936	0.0211667
McAllister	0.0147151	0.583333	0.0254	1195	802	0.00196	0.0013	0.016	0.003175	0.23	0.0508	0.0508	2	1	1	0.499569	0.0148167
McAllister	0.0147151	0.75	0.0254	1195	802	0.00196	0.0013	0.016	0.003175	0.23	0.0508	0.0508	2	1	1	0.333845	0.01905
McAllister	0.00397087	1.41667	0.0254	1118	802	0.00121	0.0013	0.016	0.003175	0.23	0.0508	0.0508	2	1	1	1	0.0359833
McAllister	0.0067818	1	0.0254	1118	802	0.00121	0.0013	0.016	0.003175	0.23	0.0508	0.0508	2	1	1	1	0.0254
McAllister	0.0101769	0.666667	0.0254	1118	802	0.00121	0.0013	0.016	0.003175	0.23	0.0508	0.0508	2	1	1	1	0.0169333
McAllister	0.0135721	0.583333	0.0254	1118	802	0.00121	0.0013	0.016	0.003175	0.23	0.0508	0.0508	2	1	1	1	0.0148167
McAllister	0.0147151	0.533333	0.0254	1118	802	0.00121	0.0013	0.016	0.003175	0.23	0.0508	0.0508	2	1	1	1	0.0135467
McAllister	0.0147151	0.583333	0.0127	1118	802	0.00121	0.0013	0.016	0.003175	0.23	0.0508	0.0508	2	1	1	1	0.00740833
McAllister	0.0135721	1.58333	0.0127	1118	802	0.00121	0.0013	0.016	0.003175	0.23	0.0508	0.0508	2	1	1	1	0.0201083
McAllister	0.0144187	1.16667	0.01905	1118	802	0.00121	0.0013	0.016	0.003175	0.23	0.0508	0.0508	2	1	1	1	0.022225
McAllister	0.00452967	1.25	0.0254	1013	802	0.00097	0.0013	0.016	0.003175	0.23	0.0508	0.0508	1	1	1	4	0.03175
McAllister	0.00557953	1.16667	0.0254	1013	802	0.00097	0.0013	0.016	0.003175	0.23	0.0508	0.0508	1	1	1	3.92526	0.0296333
McAllister	0.0079248	0.75	0.0254	1013	802	0.00097	0.0013	0.016	0.003175	0.23	0.0508	0.0508	1	1	1	4	0.01905
McAllister	0.0113284	0.583333	0.0254	1013	802	0.00097	0.0013	0.016	0.003175	0.23	0.0508	0.0508	1	1	1	4.01124	0.0148167
McAllister	0.00339513	1.16667	0.0254	1013	802	0.00097	0.0013	0.016	0.003175	0.23	0.0508	0.0508	1	1	1	4	0.0296333
McAllister	0.00452967	1	0.0254	1013	802	0.00097	0.0013	0.016	0.003175	0.23	0.0508	0.0508	1	1	1	4	0.0254
McAllister	0.0067818	0.666667	0.0254	1013	802	0.00097	0.0013	0.016	0.003175	0.23	0.0508	0.0508	1	1	1	4	0.0169333
McAllister	0.00905933	0.416667	0.0254	1013	802	0.00097	0.0013	0.016	0.003175	0.23	0.0508	0.0508	1	1	1	4	0.0105833
McAllister	0.00452967	0.916667	0.0254	1013	802	0.00097	0.0013	0.016	0.003175	0.23	0.0508	0.0508	1	1	1	4	0.0232833
McAllister	0.0067818	0.75	0.0254	1013	802	0.00097	0.0013	0.016	0.003175	0.23	0.0508	0.0508	1	1	1	4	0.01905
McAllister	0.0079248	0.583333	0.0254	1013	802	0.00097	0.0013	0.016	0.003175	0.23	0.0508	0.0508	1	1	1	4	0.0148167
McAllister	0.00331047	1.33333	0.0254	1013	802	0.00097	0.0013	0.016	0.003175	0.23	0.0508	0.0508	1	1	1	3.87531	0.0338667
McAllister	0.00508847	1.08333	0.0254	1013	802	0.00097	0.0013	0.016	0.003175	0.23	0.0508	0.0508	1	1	1	4	0.0275167
McAllister	0.0067818	0.833333	0.0254	1013	802	0.00097	0.0013	0.016	0.003175	0.23	0.0508	0.0508	1	1	1	4	0.0211667
McAllister	0.00905933	0.75	0.0254	1013	802	0.00097	0.0013	0.016	0.003175	0.23	0.0508	0.0508	1	1	1	4	0.01905
McAllister	0.012446	0.583333	0.0254	1013	802	0.00097	0.0013	0.016	0.003175	0.23	0.0508	0.0508	1	1	1	4	0.0148167
McAllister	0.00331047	1.2	0.0254	1013	802	0.00097	0.0013	0.016	0.003175	0.23	0.0508	0.0508	1	1	1	3.87531	0.03048
McAllister	0.00905933	0.416667	0.0254	1013	802	0.00097	0.0013	0.016	0.003175	0.23	0.0508	0.0508	1	1	1	4	0.0105833
McAllister	0.00452967	1.41667	0.0254	1013	802	0.00097	0.0013	0.016	0.003175	0.23	0.0508	0.0508	1	1	1	4	0.0359833
McAllister	0.0079248	0.833333	0.0254	1013	802	0.00097	0.0013	0.016	0.003175	0.23	0.0508	0.0508	1	1	1	4	0.0211667
McAllister	0.012446	0.583333	0.0254	1013	802	0.00097	0.0013	0.016	0.003175	0.23	0.0508	0.0508	1	1	1	4	0.0148167
McAllister	0.00530013	1.16667	0.0254	1060	814	0.00112	0.00163	0.0105	0.003175	0.23	0.0508	0.048768	2	1	1	2.21026	0.0296333
McAllister	0.0089154	0.833333	0.0254	1060	814	0.00112	0.00163	0.0105	0.003175	0.23	0.0508	0.048768	2	1	1	2.21037	0.0211667
McAllister	0.0100499	0.5	0.0254	1060	814	0.00112	0.00163	0.0105	0.003175	0.23	0.0508	0.048768	2	1	1	2.20811	0.0127
McAllister	0.008128	1.16667	0.0254	1000	814	0.001	0.00163	0.0105	0.003175	0.23	0.0508	0.048768	1	1	1	0.550889	0.0296333
McAllister	0.0103886	0.833333	0.0254	1000	814	0.001	0.00163	0.0105	0.003175	0.23	0.0508	0.048768	1	1	1	0.551201	0.0211667
McAllister	0.0103886	0.583333	0.0254	1000	814	0.001	0.00163	0.0105	0.003175	0.23	0.0508	0.048768	1	1	1	0.551201	0.0148167
McAllister	0.0124206	0.416667	0.0254	1000	814	0.001	0.00163	0.0105	0.003175	0.23	0.0508	0.048768	1	1	1	0.55074	0.0105833
McAllister	0.008128	1.66667	0.0254	1000	814	0.001	0.00163	0.0105	0.003175	0.23	0.0508	0.048768	1	1	1	0.550889	0.0423333
McAllister	0.0124206	1.16667	0.0254	1000	814	0.001	0.00163	0.0105	0.003175	0.23	0.0508	0.048768	1	1	1	0.55074	0.0296333
McAllister	0.0124206	0.833333	0.0254	1000	814	0.001	0.00163	0.0105	0.003175	0.23	0.0508	0.048768	1	1	1	0.55074	0.0211667
McAllister	0.0124206	0.416667	0.0254	1000	814	0.001	0.00163	0.0105	0.003175	0.23	0.0508	0.048768	1	1	1	0.55074	0.0105833
McAllister	0.0103886	0.583333	0.0254	1000	814	0.001	0.00163	0.0105	0.003175	0.23	0.0508	0.048768	1	1	1	0.551201	0.0148167
McAllister	0.0103886	0.833333	0.0254	1000	814	0.001	0.00163	0.0105	0.003175	0.23	0.0508	0.048768	1	1	1	0.551201	0.0211667
McAllister	0.00814493	1.16667	0.0254	1000	814	0.001	0.00163	0.0105	0.003175	0.23	0.0508	0.048768	1	1	1	0.551613	0.0296333
McAllister	0.0116586	0.833333	0.0254	1092	814	0.00112	0.00163	0.0105	0.003175	0.23	0.0508	0.048768	2	1	1	2.80387	0.0211667
McAllister	0.0145965	0.583333	0.0254	1000	814	0.001	0.00163	0.0105	0.003175	0.23	0.0508	0.048768	1	1	1	0.667311	0.0148167
McAllister	0.0084836	0.833333	0.0254	1000	819	0.001	0.001787	0.0133	0.003175	0.23	0.0508	0.048768	1	1	1	2.20128	0.0211667
McAllister	0.0107527	0.5	0.0254	1000	819	0.001	0.001787	0.0133	0.003175	0.23	0.0508	0.048768	1	1	1	2.20707	0.0127
McAllister	0.0096266	0.833333	0.0254	1000	819	0.001	0.001787	0.0133	0.003175	0.23	0.0508	0.048768	1	1	1	2.21186	0.0211667
McAllister	0.0110998	0.5	0.0254	1000	819	0.001	0.001787	0.0133	0.003175	0.23	0.0508	0.048768	1	1	1	2.22113	0.0127
McAllister	0.0166793	0.833333	0.0254	1063	757	0.00096	0.00142	0.016	0.003175	0.23	0.0508	0.048768	2	1	1	1.03093	0.0211667
McAllister	0.0110067	1.16667	0.0254	1063	757	0.00096	0.00142	0.016	0.003175	0.23	0.0508	0.048768	2	1	1	1.03125	0.0296333
McAllister	0.00620607	1.5	0.0254	1063	757	0.00096	0.00142	0.016	0.003175	0.23	0.0508	0.048768	2	1	1	1.03047	0.0381
McAllister	0.00877147	0.5	0.0254	1111	760	0.00104	0.00142	0.0171	0.003175	0.23	0.0508	0.048768	1	1	1	3.98077	0.0127
McAllister	0.00537633	0.833333	0.0254	1111	760	0.00104	0.00142	0.0171	0.003175	0.23	0.0508	0.048768	1	1	1	4	0.0211667
McAllister	0.00311573	1.16667	0.0254	1111	760	0.00104	0.00142	0.0171	0.003175	0.23	0.0508	0.048768	1	1	1	3.97297	0.0296333
McAllister	0.00126746	1.5	0.0254	1111	760	0.00104	0.00142	0.0171	0.003175	0.23	0.0508	0.048768	1	1	1	3.99	0.0381
McAllister	0.0226653	0.833333	0.0254	1275	765	0.003425	0.00142	0.0171	0.003175	0.23	0.0508	0.048768	2	1	1	0.298254	0.0211667
McAllister	0.0115401	1.16667	0.0254	1275	765	0.003425	0.00142	0.0171	0.003175	0.23	0.0508	0.048768	2	1	1	0.29686	0.0296333
McAllister	0.00656167	1.5	0.0254	1275	765	0.003425	0.00142	0.0171	0.003175	0.23	0.0508	0.048768	2	1	1	0.297505	0.0381
McAllister	0.0209296	1.16667	0.0254	1050	870	0.001	0.00241	0.0204	0.003175	0.23	0.0508	0.0508	2	1	1	0.220741	0.0296333
McAllister	0.013081	1.5	0.0254	1050	870	0.001	0.00241	0.0204	0.003175	0.23	0.0508	0.0508	2	1	1	0.224247	0.0381
McAllister	0.0182203	1.16667	0.0254	1050	870	0.001	0.00241	0.0204	0.003175	0.23	0.0508	0.0508	2	1	1	0.229012	0.0296333
McAllister	0.00611293	0.416667	0.0254	1010	870	0.00103	0.00241	0.0151	0.003175	0.23	0.0508	0.0508	1	1	1	5.00166	0.0105833
McAllister	0.00611293	0.583333	0.0254	1010	870	0.00103	0.0026	0.0151	0.003175	0.23	0.0508	0.0508	1	1	1	5.00166	0.0148167
McAllister	0.00339513	0.833333	0.0254	1010	870	0.00103	0.0026	0.0151	0.003175	0.23	0.0508	0.0508	1	1	1	4.99402	0.0211667
McAllister	0.00146727	1.16667	0.0254	1010	870	0.00103	0.0026	0.0151	0.003175	0.23	0.0508	0.0508	1	1	1	4.97586	0.0296333
McAllister	0.00735753	0.416667	0.0254	1010	870	0.00103	0.0026	0.0151	0.003175	0.23	0.0508	0.0508	1	1	1	5.00138	0.0105833
McAllister	0.00634069	0.583333	0.0254	1010	870	0.00103	0.0026	0.0151	0.003175	0.23	0.0508	0.0508	1	1	1	5.0008	0.0148167
McAllister	0.00452543	0.333333	0.0254	1010	870	0.00103	0.0026	0.0151	0.003175	0.23	0.0508	0.0508	1	1	1	4.99215	0.00846667
McAllister	0.0042418	0.583333	0.0254	1090	850	0.0014	0.00128	0.001	0.003175	0.23	0.0508	0.0508	1	1	1	2	0.0148167
McAllister	0.00305647	0.833333	0.0254	1090	850	0.0014	0.00128	0.001	0.003175	0.23	0.0508	0.0508	1	1	1	2.00083	0.0211667
McAllister	0.0151469	0.583333	0.0254	1420	865	0.0042	0.00087	0.023	0.003175	0.23	0.0508	0.0508	2	1	1	1.67015	0.0148167
McAllister	0.010287	0.833333	0.0254	1420	865	0.0042	0.00087	0.023	0.003175	0.23	0.0508	0.0508	2	1	1	1.67033	0.0211667
McAllister	0.00791633	1.16667	0.0254	1420	865	0.0042	0.00087	0.023	0.003175	0.23	0.0508	0.0508	2	1	1	1.67143	0.0296333
McAllister	0.0055372	1.5	0.0254	1420	865	0.0042	0.00087	0.023	0.003175	0.23	0.0508	0.0508	2	1	1	1.66939	0.0381
McAllister	0.0112014	0.833333	0.0254	1420	865	0.0042	0.00087	0.023	0.003175	0.23	0.0508	0.0508	2	1	1	1.43199	0.0211667
McAllister	0.00834898	0.583333	0.0254	1000	865	0.00092	0.00087	0.0239	0.003175	0.23	0.0508	0.0508	1	1	1	5.08704	0.0148167
McAllister	0.00554482	0.833333	0.0254	1000	865	0.00092	0.00087	0.0239	0.003175	0.23	0.0508	0.0508	1	1	1	5.00826	0.0211667
McAllister	0.00430191	1.16667	0.0254	1000	865	0.00092	0.00087	0.0239	0.003175	0.23	0.0508	0.0508	1	1	1	5.04881	0.0296333
McAllister	0.0097282	0.583333	0.0254	1000	865	0.00092	0.00087	0.0239	0.003175	0.23	0.0508	0.0508	1	1	1	4.01747	0.0148167
McAllister	0.005969	0.833333	0.0254	1000	865	0.00092	0.00087	0.0239	0.003175	0.23	0.0508	0.0508	1	1	1	4	0.0211667
McAllister	0.00452967	1.16667	0.0254	1000	865	0.00092	0.0018	0.0239	0.003175	0.23	0.0508	0.0508	1	1	1	4	0.0296333
McAllister	0.0150707	0.666667	0.0230886	1000	814	0.001002	0.0018	0.011	0.0029972	0.23	0.0508	0.0762	4	1	6	1.9916	0.0153924
McAllister	0.020066	0.666667	0.0230886	1000	814	0.001002	0.0018	0.011	0.0029972	0.23	0.0508	0.0762	4	1	6	0.5	0.0153924
McAllister	0.00258233	1.66667	0.0230886	1000	814	0.001002	0.0018	0.011	0.0029972	0.23	0.0508	0.0762	4	1	6	1.00658	0.038481
McAllister	0.00516467	1.33333	0.0230886	1000	814	0.001002	0.0018	0.011	0.0029972	0.23	0.0508	0.0762	4	1	6	1	0.0307848
McAllister	0.009779	1	0.0230886	1000	814	0.001002	0.0018	0.011	0.0029972	0.23	0.0508	0.0762	4	1	6	0.99827	0.0230886
McAllister	0.0103293	1	0.0230886	1000	814	0.001002	0.0018	0.011	0.0029972	0.23	0.0508	0.0762	4	1	6	1	0.0230886
McAllister	0.0159597	0.666667	0.0230886	1000	814	0.001002	0.0018	0.011	0.0029972	0.23	0.0508	0.0762	4	1	6	1.00106	0.0153924
McAllister	0.01778	0.5	0.0230886	1000	814	0.001002	0.0018	0.011	0.0029972	0.23	0.0508	0.0762	4	1	6	1	0.0115443
McAllister	0.0155025	0.416667	0.0254	1000	814	0.001	0.00163	0.0105	0.003175	0.1	0.0508	0.0508	4	1	6	0.551695	0.0105833
McAllister	0.0126746	0.583333	0.0254	1000	814	0.001	0.00163	0.0105	0.003175	0.1	0.0508	0.0508	1	1	5	0.552905	0.0148167
McAllister	0.006223	0.833333	0.0254	1000	814	0.001	0.00163	0.0105	0.003175	0.1	0.0508	0.0508	1	1	5	0.550633	0.0211667
McAllister	0.0235373	0.583333	0.0254	1000	814	0.001	0.00163	0.0105	0.0047625	0.23	0.0508	0.048768	1	1	5	0.666667	0.0148167
McAllister	0.0042418	0.5	0.0254	1111	760	0.00104	0.00145	0.0171	0.003175	0.1	0.0508	0.048768	1	1	5	4.01	0.0127
McAllister	0.00294217	0.833333	0.0254	1111	760	0.00104	0.00145	0.0171	0.003175	0.1	0.0508	0.048768	1	1	5	4	0.0211667
McAllister	0.00155025	1.16667	0.0254	1111	760	0.00104	0.00145	0.0171	0.003175	0.1	0.0508	0.048768	1	1	5	4.00273	0.0296333
McAllister	0.0132757	0.416667	0.0254	1000	814	0.001	0.00163	0.0105	0.003175	0.1	0.0508	0.0508	1	1	6	0.55094	0.0105833
McAllister	0.00950807	0.583333	0.0254	1000	814	0.001	0.00163	0.0105	0.003175	0.1	0.0508	0.0508	1	1	6	0.548966	0.0148167
McAllister	0.00679873	0.833333	0.0254	1000	814	0.001	0.00163	0.0105	0.003175	0.1	0.0508	0.0508	1	1	6	0.550193	0.0211667
McAllister	0.0155109	0.416667	0.0254	1000	814	0.001	0.00163	0.0105	0.003175	0.1	0.0508	0.0508	1	1	5	0.549915	0.0105833
McAllister	0.0126915	0.583333	0.0254	1000	814	0.001	0.00163	0.0105	0.003175	0.1	0.0508	0.0508	1	1	5	0.548554	0.0148167
McAllister	0.006223	0.833333	0.0254	1000	814	0.001	0.00163	0.0105	0.003175	0.1	0.0508	0.0508	1	1	5	0.550633	0.0211667
McAllister	0.0239607	1	0.0230886	1002	814	0.001002	0.0018	0.0112	0.0029972	0.23	0.0508	0.0762	1	1	6	1.11985	0.0230886
McAllister	0.0258064	0.833333	0.0230886	1002	814	0.001002	0.0018	0.0112	0.0029972	0.23	0.0508	0.0762	1	1	6	1.08767	0.0192405
McAllister	0.0115993	1.33333	0.0230886	1002	814	0.001002	0.0018	0.0112	0.0029972	0.23	0.0508	0.0762	1	1	6	1.06015	0.0307848
McAllister	0.0260773	0.666667	0.0230886	1002	814	0.001002	0.0018	0.0112	0.0029972	0.23	0.0508	0.0762	1	1	5	1.08814	0.0153924
McAllister	0.0115993	1.33333	0.0230886	1002	814	0.001002	0.0018	0.0112	0.0029972	0.23	0.0508	0.0762	1	1	6	1.06015	0.0307848
McAllister	0.0149013	0.683333	0.0230886	1002	814	0.001002	0.0018	0.0112	0.0029972	0.23	0.0508	0.0762	1	1	6	1.02299	0.0157772
McAllister	0.0123613	1.01667	0.0230886	1002	814	0.001002	0.0018	0.0112	0.0029972	0.23	0.0508	0.0762	1	1	5	1.02778	0.0234734
McAllister	0.00771313	1.33333	0.0230886	1002	814	0.001002	0.0018	0.0112	0.0029972	0.23	0.0508	0.0762	1	1	6	0.980435	0.0307848
McAllister	0.0138853	0.833333	0.0230886	1002	814	0.001002	0.0018	0.0112	0.0029972	0.23	0.0508	0.0762	1	1	5	0.978287	0.0192405
McAllister	0.0041148	1.66667	0.0230886	1002	814	0.001002	0.0018	0.0112	0.0029972	0.23	0.0508	0.0762	1	1	5	1	0.038481
McAllister	0.006096	1.33333	0.0230886	1002	814	0.001002	0.0018	0.0112	0.0029972	0.23	0.0508	0.0762	1	1	6	0.972603	0.0307848
McAllister	0.00850053	1.33333	0.0230886	1002	814	0.001002	0.0018	0.0112	0.0029972	0.23	0.0508	0.0762	1	1	6	1	0.0307848
McAllister	0.010541	1	0.0230886	1002	814	0.001002	0.0018	0.0112	0.0029972	0.23	0.0508	0.0762	1	1	5	1.00161	0.0230886
McAllister	0.0128693	1	0.0230886	1002	814	0.001002	0.0018	0.0112	0.0029972	0.23	0.0508	0.0762	1	1	5	1	0.0230886
McAllister	0.0135043	0.666667	0.0230886	1002	814	0.001002	0.0018	0.0112	0.0029972	0.23	0.0508	0.0762	1	1	6	1.00125	0.0153924
McAllister	0.0154517	0.666667	0.0230886	1002	814	0.001002	0.0018	0.0112	0.0029972	0.23	0.0508	0.0762	1	1	6	1.0011	0.0153924
McAllister	0.0154517	0.5	0.0230886	1002	814	0.001002	0.0018	0.0112	0.0029972	0.23	0.0508	0.0762	1	1	6	0.998905	0.0115443
McAllister	0.00516467	1.66667	0.0230886	1002	814	0.001002	0.0018	0.0112	0.0029972	0.23	0.0508	0.0762	1	1	6	1	0.038481
McAllister	0.00643467	1.56667	0.0230886	1002	814	0.001002	0.0018	0.0112	0.0029972	0.23	0.0508	0.0762	1	1	6	1	0.0361721
McAllister	0.0110913	1.33333	0.0230886	1002	814	0.001002	0.0018	0.0112	0.0029972	0.23	0.0508	0.0762	1	1	6	1	0.0307848
McAllister	0.0237067	1	0.0230886	1002	814	0.001002	0.0018	0.0112	0.0029972	0.23	0.0508	0.0762	1	1	6	1	0.0230886
McAllister	0.0240453	1	0.0230886	1002	814	0.001002	0.0018	0.0112	0.0029972	0.23	0.0508	0.0762	4	1	5	1	0.0230886
McAllister	0.0254847	0.833333	0.0230886	1002	814	0.001002	0.0018	0.0112	0.0029972	0.23	0.0508	0.0762	4	1	6	1	0.0192405
McAllister	0.0258064	0.666667	0.0230886	1002	814	0.001002	0.0018	0.0112	0.0029972	0.23	0.0508	0.0762	4	1	6	1	0.0153924
McAllister	0.00475827	1.33333	0.01524	1088	950	0.00098	0.00308	0.0145	0.0044704	0.294	0.027178	0.0762	4	1	35	7.26471	0.02032
McAllister	0.00949113	1.08333	0.01524	1088	950	0.00098	0.00308	0.0145	0.0044704	0.294	0.027178	0.0762	4	1	35	7.3037	0.01651
McAllister	0.00475827	1.41667	0.01524	1088	950	0.00098	0.00308	0.0145	0.004953	0.237	0.0286766	0.0762	4	1	36	7.26471	0.02159
McAllister	0.00949113	1	0.01524	1088	950	0.00098	0.00308	0.0145	0.004953	0.237	0.0286766	0.0762	4	1	36	7.3037	0.01524
McAllister	0.00475827	1.41667	0.01524	1088	950	0.00098	0.00308	0.0145	0.004953	0.237	0.0291338	0.0762	4	1	37	7.26471	0.02159
McAllister	0.00949113	1.08333	0.01524	1088	950	0.00098	0.00308	0.0145	0.004953	0.237	0.0291338	0.0762	4	1	37	7.3037	0.01651
McAllister	0.00475827	1.45	0.01524	1088	950	0.00098	0.00308	0.0145	0.004699	0.303	0.027432	0.0762	4	1	38	7.26471	0.022098
McAllister	0.00475827	1.41667	0.01524	1088	950	0.00098	0.00308	0.0145	0.004699	0.303	0.0286512	0.0762	4	1	39	7.26471	0.02159
McAllister	0.00475827	1.33333	0.01524	1088	950	0.00098	0.00308	0.0145	0.0044958	0.297	0.0277876	0.0762	4	1	40	7.26471	0.02032
McAllister	0.00949113	0.916667	0.01524	1088	950	0.00098	0.00308	0.0145	0.0044958	0.297	0.0277876	0.0762	4	1	40	7.3037	0.01397
McAllister	0.00475827	1.33333	0.01524	1088	950	0.00098	0.00308	0.0145	0.004445	0.2	0.0265938	0.0762	4	1	41	7.26471	0.02032
McAllister	0.00475827	1.33333	0.01524	1088	950	0.00098	0.00308	0.0145	0.004318	0.274	0.0277876	0.0762	4	1	42	7.26471	0.02032
McAllister	0.00949113	0.916667	0.01524	1088	950	0.00098	0.00308	0.0145	0.004318	0.274	0.0277876	0.0762	4	1	42	7.3037	0.01397
McAllister	0.00475827	1.5	0.01524	1088	950	0.00098	0.00308	0.0145	0.0047752	0.274	0.027432	0.0762	4	1	43	7.26471	0.02286
McAllister	0.00949113	1.16667	0.01524	1088	950	0.00098	0.00308	0.0145	0.0047752	0.274	0.027432	0.0762	4	1	43	7.3037	0.01778
McAllister	0.00475827	1.41667	0.01524	1088	950	0.00098	0.00308	0.0145	0.004191	0.258	0.0276098	0.0762	4	1	44	7.26471	0.02159
McAllister	0.00949113	1.16667	0.01524	1088	950	0.00098	0.00308	0.0145	0.004191	0.258	0.0276098	0.0762	4	1	44	7.3037	0.01778
McAllister	0.00475827	1.41667	0.01524	1088	950	0.00098	0.00308	0.0145	0.0047752	0.333	0.0276098	0.0762	4	1	45	7.26471	0.02159
McAllister	0.00949113	1.08333	0.01524	1088	950	0.00098	0.00308	0.0145	0.0047752	0.333	0.0276098	0.0762	4	1	45	7.3037	0.01651
McAllister	0.00475827	1.46667	0.01524	1088	950	0.00098	0.00308	0.0145	0.0047752	0.333	0.02794	0.0762	4	1	46	7.26471	0.022352
McAllister	0.00949113	1.08333	0.01524	1088	950	0.00098	0.00308	0.0145	0.0047752	0.333	0.0276352	0.0762	4	1	46	7.3037	0.01651
McAllister	0.00475827	1.41667	0.01524	1088	950	0.00098	0.00308	0.0145	0.004318	0.276	0.02794	0.0762	4	1	47	7.26471	0.02159
McAllister	0.00475827	1.25	0.01524	1088	950	0.00098	0.00308	0.0145	0.004572	0.212	0.036322	0.0762	4	1	48	7.26471	0.01905
McAllister	0.00475827	1.33333	0.01524	1088	950	0.00098	0.00308	0.0145	0.004445	0.154	0.030734	0.0762	4	1	49	7.26471	0.02032
McAllister	0.00475827	1.3	0.01524	1088	950	0.00098	0.00308	0.0145	0.004445	0.154	0.030734	0.0762	4	1	50	7.26471	0.019812
McAllister	0.00475827	1.5	0.01524	1072	929	0.00102	0.00289	0.013	0.00635	0.405	0.027178	0.0762	4	1	51	7.26471	0.02286
McAllister	0.00475827	1.5	0.01524	1072	929	0.00102	0.00289	0.013	0.0047752	0.41	0.027178	0.0762	4	1	51	7.26471	0.02286
McAllister	0.00949113	1.08333	0.01524	1072	929	0.00102	0.00289	0.013	0.0047752	0.41	0.027178	0.0762	4	1	51	7.3037	0.01651
McAllister	0.00475827	1.5	0.01524	1072	929	0.00102	0.00289	0.013	0.0044704	0.294	0.027178	0.0762	4	1	51	7.26471	0.02286
McAllister	0.00475827	1.38333	0.01524	1072	929	0.00102	0.00289	0.013	0.0028702	0.327	0.027178	0.0762	4	1	51	7.26471	0.021082
McAllister	0.00475827	1.46667	0.01524	1072	929	0.00102	0.00289	0.013	0.00635	0.231	0.027178	0.0762	4	1	51	7.26471	0.022352
McAllister	0.00475827	1.38333	0.01524	1072	929	0.00102	0.00289	0.013	0.0047752	0.236	0.027178	0.0762	4	1	51	7.26471	0.021082
McAllister	0.00475827	1.41667	0.01524	1072	929	0.00102	0.00289	0.013	0.003175	0.231	0.027178	0.0762	4	1	51	7.26471	0.02159
McAllister	0.00475827	1.38333	0.01524	1072	929	0.00102	0.00289	0.013	0.002032	0.258	0.027178	0.0762	4	1	51	7.26471	0.021082
McAllister	0.00475827	1.41667	0.01524	1072	929	0.00102	0.00289	0.013	0.00635	0.108	0.027178	0.0762	4	1	51	7.26471	0.02159
McAllister	0.00475827	1.41667	0.01524	1072	929	0.00102	0.00289	0.013	0.003175	0.101	0.027178	0.0762	4	1	51	7.26471	0.02159
McAllister	0.00475827	1.41667	0.01524	1072	929	0.00102	0.00289	0.013	0.0015748	0.103	0.027178	0.0762	4	1	51	7.26471	0.02159
McAllister	0.00475827	1.41667	0.01524	1072	929	0.00102	0.00289	0.013	0.0013208	0.465	0.027178	0.0762	4	1	51	7.26471	0.02159
McAllister	0.00475827	1.41667	0.01524	1072	929	0.00102	0.00289	0.013	0.0044704	0.294	0.027178	0.0762	4	1	51	3.56911	0.02159
McAllister	0.00356447	1.08333	0.01524	1072	929	0.00102	0.00289	0.013	0.0044704	0.294	0.027178	0.0762	4	1	51	0.227405	0.01651
McAllister	0.00475827	1.5	0.01524	1072	929	0.00102	0.00289	0.013	0.0044704	0.294	0.027178	0.0762	4	1	51	2.32544	0.02286
McAllister	0.00949113	1.08333	0.01524	1072	929	0.00102	0.00289	0.013	0.0044704	0.294	0.027178	0.0762	4	1	51	2.34627	0.01651
McAllister	0.00475827	1.75	0.00762	1072	929	0.00102	0.00289	0.013	0.0044704	0.294	0.027178	0.0762	4	1	51	7.26471	0.013335
McAllister	0.00949113	1.41667	0.00762	1072	929	0.00102	0.00289	0.013	0.0044704	0.294	0.027178	0.0762	4	1	51	7.3037	0.010795
McAllister	0.00475827	1.75	0.00762	1072	929	0.00102	0.00289	0.013	0.0044704	0.294	0.027178	0.0762	4	1	51	3.56911	0.013335
McAllister	0.00949113	1.5	0.00762	1072	929	0.00102	0.00289	0.013	0.0044704	0.294	0.027178	0.0762	4	1	51	2.26822	0.01143
McAllister	0.00475827	1.71667	0.00762	1072	929	0.00102	0.00289	0.013	0.0044704	0.294	0.027178	0.0762	4	1	51	2.32544	0.013081
McAllister	0.00949113	1.41667	0.00762	1072	929	0.00102	0.00289	0.013	0.0044704	0.294	0.027178	0.0762	4	1	51	2.34627	0.010795
McAllister	0.00475827	1.16667	0.02286	1072	929	0.00102	0.00289	0.013	0.0044704	0.294	0.027178	0.0762	4	1	51	7.26471	0.02667
McAllister	0.00949113	1	0.02286	1072	929	0.00102	0.00289	0.013	0.0044704	0.294	0.027178	0.0762	4	1	51	7.3037	0.02286
McAllister	0.00475827	1.25	0.02286	1072	929	0.00102	0.00289	0.013	0.0044704	0.294	0.027178	0.0762	4	1	51	3.56911	0.028575
McAllister	0.00949113	0.916667	0.02286	1072	929	0.00102	0.00289	0.013	0.0044704	0.294	0.027178	0.0762	4	1	51	2.26822	0.020955
McAllister	0.00475827	1.16667	0.02286	1072	929	0.00102	0.00289	0.013	0.0044704	0.294	0.027178	0.0762	4	1	51	2.32544	0.02667
McAllister	0.00475827	0.633333	0.02286	1072	929	0.00102	0.00289	0.013	0.0044704	0.294	0.027178	0.0762	4	1	51	2.32544	0.014478
McAllister	0.00475827	1	0.03048	1072	929	0.00102	0.00289	0.013	0.0044704	0.294	0.027178	0.0762	4	1	51	7.26471	0.03048
McAllister	0.00475827	1.5	0.01524	1000	849	0.0009	0.00221	0.0107	0.0044704	0.294	0.027178	0.0762	4	1	51	7.26471	0.02286
McAllister	0.00949113	1.33333	0.01524	1000	849	0.0009	0.00221	0.0107	0.0044704	0.294	0.027178	0.0762	4	1	51	7.3037	0.02032
McAllister	0.00475827	1.66667	0.01524	1000	849	0.0009	0.00221	0.0107	0.0015748	0.103	0.027178	0.0762	4	1	51	7.26471	0.0254
McAllister	0.00475827	1.5	0.01524	1000	849	0.0009	0.00221	0.0107	0.00635	0.108	0.027178	0.0762	4	1	51	7.26471	0.02286
McAllister	0.00475827	1.66667	0.01524	1000	849	0.0009	0.00221	0.0107	0.002032	0.258	0.027178	0.0762	4	1	51	7.26471	0.0254
McAllister	0.00475827	1.66667	0.01524	1000	849	0.0009	0.00221	0.0107	0.00635	0.231	0.027178	0.0762	4	1	51	7.26471	0.0254
McAllister	0.00475827	1.66667	0.01524	1000	849	0.0009	0.00221	0.0107	0.00635	0.405	0.027178	0.0762	4	1	51	7.26471	0.0254
McAllister	0.00475827	1.66667	0.01524	1000	849	0.0009	0.00221	0.0107	0.0044704	0.294	0.027178	0.0762	4	1	51	2.32544	0.0254
McAllister	0.00949113	1.5	0.01524	1000	849	0.0009	0.00221	0.0107	0.0044704	0.294	0.027178	0.0762	4	1	51	2.34627	0.02286
McAllister	0.00475827	1.5	0.01524	1000	849	0.0009	0.00221	0.0107	0.0044704	0.294	0.027178	0.0762	4	1	51	7.26471	0.02286
McAllister	0.00949113	1.25	0.01524	1000	849	0.0009	0.00221	0.0107	0.0044704	0.294	0.027178	0.0762	4	1	51	7.3037	0.01905
McAllister	0.00475827	1.5	0.01524	1000	849	0.0009	0.00221	0.0107	0.0044704	0.294	0.027178	0.0762	4	1	51	2.32544	0.02286
McAllister	0.00949113	1.16667	0.01524	1000	849	0.0009	0.00221	0.0107	0.0044704	0.294	0.027178	0.0762	4	1	51	2.34627	0.01778
McAllister	0.00475827	1.91667	0.00762	1000	849	0.0009	0.00221	0.0107	0.0044704	0.294	0.027178	0.0762	4	1	51	7.26471	0.014605
McAllister	0.00949113	1.7	0.00762	1000	849	0.0009	0.00221	0.0107	0.0044704	0.294	0.027178	0.0762	4	1	51	7.3037	0.012954
McAllister	0.00475827	1.91667	0.00762	1000	849	0.0009	0.00221	0.0107	0.0044704	0.294	0.027178	0.0762	4	1	51	2.32544	0.014605
McAllister	0.00949113	1.58333	0.00762	1000	849	0.0009	0.00221	0.0107	0.0044704	0.294	0.027178	0.0762	4	1	51	2.34627	0.012065
McAllister	0.00475827	1.16667	0.02286	1000	849	0.0009	0.00221	0.0107	0.0044704	0.294	0.027178	0.0762	4	1	51	7.26471	0.02667
McAllister	0.00949113	0.95	0.02286	1000	849	0.0009	0.00221	0.0107	0.0044704	0.294	0.027178	0.0762	4	1	51	7.3037	0.021717
McAllister	0.00475827	1.1	0.02286	1000	849	0.0009	0.00221	0.0107	0.0044704	0.294	0.027178	0.0762	4	1	51	2.32544	0.025146
McAllister	0.00949113	0.75	0.02286	1000	849	0.0009	0.00221	0.0107	0.0044704	0.294	0.027178	0.0762	4	1	51	2.34627	0.017145
McAllister	0.00475827	1.33333	0.01524	1000	849	0.0009	0.00221	0.0107	0.0015748	0.103	0.027178	0.0762	4	1	51	7.26471	0.02032
McAllister	0.00475827	1.33333	0.01524	1000	849	0.0009	0.00221	0.0107	0.00635	0.108	0.027178	0.0762	4	1	51	7.26471	0.02032
McAllister	0.00475827	1.41667	0.01524	1000	849	0.0009	0.00221	0.0107	0.002032	0.258	0.027178	0.0762	4	1	51	7.26471	0.02159
McAllister	0.00475827	1.41667	0.01524	1000	849	0.0009	0.00221	0.0107	0.00635	0.231	0.027178	0.0762	4	1	51	7.26471	0.02159
McAllister	0.00475827	1.5	0.01524	1000	849	0.0009	0.00221	0.0107	0.00635	0.405	0.027178	0.0762	4	1	51	7.26471	0.02286
McAllister	0.00475827	1.5	0.01524	1000	849	0.0009	0.00221	0.0107	0.0047752	0.41	0.027178	0.0762	4	1	51	7.26471	0.02286
McAllister	0.00475827	1.38333	0.01524	1000	849	0.0009	0.00221	0.0107	0.0013208	0.465	0.027178	0.0762	4	1	51	7.26471	0.021082
McAllister	0.00475827	1.45	0.01524	1000	849	0.0009	0.00221	0.0107	0.0047752	0.236	0.027178	0.0762	4	1	51	7.26471	0.022098
McAllister	0.00949113	1.5	0.01524	1046	858	0.00092	0.00239	0.0106	0.0044704	0.294	0.027178	0.0762	4	1	51	2.34627	0.02286
McAllister	0.00475827	1.58333	0.01524	1046	858	0.00092	0.00239	0.0106	0.0044704	0.294	0.027178	0.0762	4	1	51	7.26471	0.02413
McAllister	0.00949113	1.5	0.01524	1046	858	0.00092	0.00239	0.0106	0.0044704	0.294	0.027178	0.0762	4	1	51	7.3037	0.02286
McAllister	0.00475827	1.5	0.01524	1046	858	0.00092	0.00239	0.0106	0.0015748	0.103	0.027178	0.0762	4	1	51	7.26471	0.02286
McAllister	0.00475827	1.58333	0.01524	1046	858	0.00092	0.00239	0.0106	0.0044704	0.294	0.027178	0.0762	4	1	51	7.26471	0.02413
McAllister	0.00475827	1.5	0.01524	1046	858	0.00092	0.00239	0.0106	0.0015748	0.103	0.027178	0.0762	4	1	51	7.26471	0.02286
McAllister	0.00475827	1.5	0.01524	1046	858	0.00092	0.00239	0.0106	0.003175	0.101	0.027178	0.0762	4	1	51	7.26471	0.02286
McAllister	0.00475827	1.5	0.01524	1046	858	0.00092	0.00239	0.0106	0.00635	0.108	0.027178	0.0762	4	1	51	7.26471	0.02286
McAllister	0.00475827	1.66667	0.01524	1046	858	0.00092	0.00239	0.0106	0.002032	0.258	0.027178	0.0762	4	1	51	7.26471	0.0254
McAllister	0.00475827	1.66667	0.01524	1046	858	0.00092	0.00239	0.0106	0.003175	0.231	0.027178	0.0762	4	1	51	7.26471	0.0254
McAllister	0.00475827	1.58333	0.01524	1046	858	0.00092	0.00239	0.0106	0.0047752	0.236	0.027178	0.0762	4	1	51	7.26471	0.02413
McAllister	0.00475827	1.58333	0.01524	1046	858	0.00092	0.00239	0.0106	0.00635	0.231	0.027178	0.0762	4	1	51	7.26471	0.02413
McAllister	0.00475827	1.66667	0.01524	1046	858	0.00092	0.00239	0.0106	0.0028702	0.327	0.027178	0.0762	4	1	51	7.26471	0.0254
McAllister	0.00475827	1.58333	0.01524	1046	858	0.00092	0.00239	0.0106	0.0044704	0.294	0.027178	0.0762	4	1	51	7.26471	0.02413
McAllister	0.00949113	1.41667	0.01524	1046	858	0.00092	0.00239	0.0106	0.0044704	0.294	0.027178	0.0762	4	1	51	7.3037	0.02159
McAllister	0.00475827	1.66667	0.01524	1046	858	0.00092	0.00239	0.0106	0.0047752	0.41	0.027178	0.0762	4	1	51	7.26471	0.0254
McAllister	0.00475827	1.66667	0.01524	1046	858	0.00092	0.00239	0.0106	0.00635	0.405	0.027178	0.0762	4	1	51	7.26471	0.0254
McAllister	0.00522393	1.5	0.01524	1046	858	0.00092	0.00239	0.0106	0.0044704	0.294	0.027178	0.0762	4	1	51	4.01626	0.02286
McAllister	0.00949113	1.33333	0.01524	1046	858	0.00092	0.00239	0.0106	0.0044704	0.294	0.027178	0.0762	4	1	51	2.34627	0.02032
McAllister	0.00475827	1.53333	0.01524	1046	858	0.00092	0.00239	0.0106	0.0044704	0.294	0.027178	0.0762	4	1	51	1.16154	0.023368
McAllister	0.00712047	1.41667	0.01524	1046	858	0.00092	0.00239	0.0106	0.0044704	0.294	0.027178	0.0762	4	1	51	1.16753	0.02159
McAllister	0.00475827	2	0.00762	1046	858	0.00092	0.00239	0.0106	0.0044704	0.294	0.027178	0.0762	4	1	51	7.26471	0.01524
McAllister	0.00949113	1.83333	0.00762	1046	858	0.00092	0.00239	0.0106	0.0044704	0.294	0.027178	0.0762	4	1	51	7.3037	0.01397
McAllister	0.00475827	2	0.00762	1046	858	0.00092	0.00239	0.0106	0.0044704	0.294	0.027178	0.0762	4	1	51	2.32544	0.01524
McAllister	0.00949113	1.83333	0.00762	1046	858	0.00092	0.00239	0.0106	0.0044704	0.294	0.027178	0.0762	4	1	51	2.34627	0.01397
McAllister	0.00475827	2	0.00762	1046	858	0.00092	0.00239	0.0106	0.0044704	0.294	0.027178	0.0762	4	1	51	1.16154	0.01524
McAllister	0.00712047	1.83333	0.00762	1046	858	0.00092	0.00239	0.0106	0.0044704	0.294	0.027178	0.0762	4	1	51	1.16753	0.01397
McAllister	0.00475827	1.33333	0.02286	1046	858	0.00092	0.00239	0.0106	0.0044704	0.294	0.027178	0.0762	4	1	51	7.26471	0.03048
McAllister	0.00949113	1.08333	0.02286	1046	858	0.00092	0.00239	0.0106	0.0044704	0.294	0.027178	0.0762	4	1	51	7.3037	0.024765
McAllister	0.00475827	1.25	0.02286	1046	858	0.00092	0.00239	0.0106	0.0044704	0.294	0.027178	0.0762	4	1	51	2.32544	0.028575
McAllister	0.00948267	1.08333	0.02286	1046	858	0.00092	0.00239	0.0106	0.0044704	0.294	0.027178	0.0762	4	1	51	2.34328	0.024765
McAllister	0.00475827	1.33333	0.02286	1046	858	0.00092	0.00239	0.0106	0.0044704	0.294	0.027178	0.0762	4	1	51	1.16154	0.03048
McAllister	0.00712047	1.16667	0.02286	1046	858	0.00092	0.00239	0.0106	0.0044704	0.294	0.027178	0.0762	4	1	51	1.16753	0.02667
McAllister	0.00475827	1.16667	0.03048	1046	858	0.00092	0.00239	0.0106	0.0044704	0.294	0.027178	0.0762	4	1	51	7.26471	0.03556
McAllister	0.00949113	1	0.03048	1046	858	0.00092	0.00239	0.0106	0.0044704	0.294	0.027178	0.0762	4	1	51	7.3037	0.03048
McAllister	0.00475827	1.08333	0.03048	1046	858	0.00092	0.00239	0.0106	0.0044704	0.294	0.027178	0.0762	4	1	51	2.32544	0.03302
McAllister	0.00949113	0.916667	0.03048	1046	858	0.00092	0.00239	0.0106	0.0044704	0.294	0.027178	0.0762	4	1	51	2.34627	0.02794
McAllister	0.00475827	1.08333	0.03048	1046	858	0.00092	0.00239	0.0106	0.0044704	0.294	0.027178	0.0762	4	1	51	1.16154	0.03302
McAllister	0.00712047	1	0.03048	1046	858	0.00092	0.00239	0.0106	0.0044704	0.294	0.027178	0.0762	4	1	51	1.16753	0.03048
McAllister	0.00475827	1.66667	0.01524	1327	882	0.00174	0.00229	0.012	0.0044704	0.294	0.027178	0.0762	4	1	51	7.26471	0.0254
McAllister	0.00949113	1.5	0.01524	1327	882	0.00174	0.00229	0.012	0.0044704	0.294	0.027178	0.0762	4	1	51	7.3037	0.02286
McAllister	0.00475827	1.58333	0.01524	1327	882	0.00174	0.00229	0.012	0.0044704	0.294	0.027178	0.0762	4	1	51	2.32544	0.02413
McAllister	0.00475827	1.66667	0.01524	1327	882	0.00174	0.00229	0.012	0.0044704	0.294	0.027178	0.0762	4	1	51	1.16154	0.0254
McAllister	0.00475827	2	0.00762	1327	882	0.00174	0.00229	0.012	0.0044704	0.294	0.027178	0.0762	4	1	51	7.26471	0.01524
McAllister	0.00475827	2	0.00762	1327	882	0.00174	0.00229	0.012	0.0044704	0.294	0.027178	0.0762	4	1	51	7.26471	0.01524
McAllister	0.00949113	1.83333	0.00762	1327	882	0.00174	0.00229	0.012	0.0044704	0.294	0.027178	0.0762	4	1	51	7.3037	0.01397
McAllister	0.00475827	1.91667	0.00762	1327	882	0.00174	0.00229	0.012	0.0044704	0.294	0.027178	0.0762	4	1	51	2.32544	0.014605
McAllister	0.00475827	1.91667	0.00762	1327	882	0.00174	0.00229	0.012	0.0044704	0.294	0.027178	0.0762	4	1	51	1.16154	0.014605
McAllister	0.00475827	1.5	0.02286	1327	882	0.00174	0.00229	0.012	0.0044704	0.294	0.027178	0.0762	4	1	51	7.26471	0.03429
McAllister	0.00949113	1.33333	0.02286	1327	882	0.00174	0.00229	0.012	0.0044704	0.294	0.027178	0.0762	4	1	51	7.3037	0.03048
McAllister	0.00475827	1.41667	0.02286	1327	882	0.00174	0.00229	0.012	0.0044704	0.294	0.027178	0.0762	4	1	51	2.32544	0.032385
McAllister	0.00475827	1.33333	0.02286	1327	882	0.00174	0.00229	0.012	0.0044704	0.294	0.027178	0.0762	4	1	51	1.16154	0.03048
McAllister	0.00475827	1.41667	0.01524	1327	882	0.00174	0.00229	0.012	0.0015748	0.103	0.027178	0.0762	4	1	51	7.26471	0.02159
McAllister	0.00475827	1.41667	0.01524	1327	882	0.00174	0.00229	0.012	0.00635	0.108	0.027178	0.0762	4	1	51	7.26471	0.02159
McAllister	0.00475827	1.66667	0.01524	1327	882	0.00174	0.00229	0.012	0.002032	0.258	0.027178	0.0762	4	1	51	7.26471	0.0254
McAllister	0.00475827	1.66667	0.01524	1327	882	0.00174	0.00229	0.012	0.0047752	0.236	0.027178	0.0762	4	1	51	7.26471	0.0254
McAllister	0.00475827	1.66667	0.01524	1327	882	0.00174	0.00229	0.012	0.00635	0.231	0.027178	0.0762	4	1	51	7.26471	0.0254
McAllister	0.00475827	1.66667	0.01524	1327	882	0.00174	0.00229	0.012	0.0013208	0.465	0.027178	0.0762	4	1	51	7.26471	0.0254
McAllister	0.00475827	1.66667	0.01524	1327	882	0.00174	0.00229	0.012	0.0047752	0.41	0.027178	0.0762	4	1	51	7.26471	0.0254
McAllister	0.00475827	1.66667	0.01524	1327	882	0.00174	0.00229	0.012	0.00635	0.405	0.027178	0.0762	4	1	51	7.26471	0.0254
McAllister	0.0191093	0.833333	0.0254	814	1092	0.00163	0.00112	0.0105	0.003175	0.23	0.0508	0.048768	3	2	1	0.142785	0.0211667
McAllister	0.00654473	1.16667	0.0254	814	1060	0.00163	0.00112	0.0105	0.003175	0.23	0.0508	0.048768	2	2	1	0.453008	0.0296333
McAllister	0.0089154	0.833333	0.0254	814	1060	0.00163	0.00112	0.0105	0.003175	0.23	0.0508	0.048768	2	2	1	0.452414	0.0211667
McAllister	0.0127762	0.5	0.0254	814	1060	0.00163	0.00112	0.0105	0.003175	0.23	0.0508	0.048768	2	2	1	0.450962	0.0127
McAllister	0.008128	1.16667	0.0254	814	1000	0.00163	0.001	0.0105	0.003175	0.23	0.0508	0.048768	1	2	1	1.81525	0.0296333
McAllister	0.0103886	0.833333	0.0254	814	1000	0.00163	0.001	0.0105	0.003175	0.23	0.0508	0.048768	1	2	1	1.81422	0.0211667
McAllister	0.0124206	0.583333	0.0254	814	1000	0.00163	0.001	0.0105	0.003175	0.23	0.0508	0.048768	1	2	1	1.81574	0.0148167
McAllister	0.0124121	0.416667	0.0254	814	1000	0.00163	0.001	0.0105	0.003175	0.23	0.0508	0.048768	1	2	1	1.81382	0.0105833
McAllister	0.0124206	0.416667	0.0254	814	1000	0.00163	0.001	0.0105	0.003175	0.23	0.0508	0.048768	1	2	1	1.81574	0.0105833
McAllister	0.0124206	0.583333	0.0254	814	1000	0.00163	0.001	0.0105	0.003175	0.23	0.0508	0.048768	1	2	1	1.81574	0.0148167
McAllister	0.0103886	0.833333	0.0254	814	1000	0.00163	0.001	0.0105	0.003175	0.23	0.0508	0.048768	1	2	1	1.81422	0.0211667
McAllister	0.008128	1.16667	0.0254	814	1000	0.00163	0.001	0.0105	0.003175	0.23	0.0508	0.048768	1	2	1	1.81525	0.0296333
McAllister	0.0145965	0.583333	0.0254	814	1000	0.00163	0.001	0.0105	0.003175	0.23	0.0508	0.048768	1	2	1	1.49855	0.0148167
McAllister	0.0158581	0.5	0.0254	814	1092	0.00163	0.00112	0.0105	0.003175	0.1	0.0508	0.048768	3	2	5	0.14277	0.0127
McAllister	0.0141503	0.833333	0.0254	814	1092	0.00163	0.00112	0.0105	0.003175	0.1	0.0508	0.048768	3	2	5	0.142926	0.0211667
McAllister	0.0056515	1.16667	0.0254	814	1092	0.00163	0.00112	0.0105	0.003175	0.1	0.0508	0.048768	3	2	5	0.142979	0.0296333
McAllister	0.00213275	1.16667	0.0254	816	1213	0.00175	0.0014	0.0136	0.003175	0.1	0.0508	0.0508	4	2	5	50.4082	0.0296333
McAllister	0.00423164	0.833333	0.0254	816	1213	0.00175	0.0014	0.0136	0.003175	0.1	0.0508	0.0508	4	2	5	50	0.0211667
McAllister	0.00937091	0.583333	0.0254	816	1213	0.00175	0.0014	0.0136	0.003175	0.1	0.0508	0.0508	4	2	5	49.7706	0.0148167
McAllister	0.00421555	0.833333	0.0254	816	1213	0.00175	0.0014	0.0136	0.003175	0.1	0.0508	0.0508	4	2	5	4.93445	0.0211667
McAllister	0.00989923	0.583333	0.0254	816	1213	0.00175	0.0014	0.0136	0.003175	0.1	0.0508	0.0508	4	2	5	5.3821	0.0148167
McAllister	0.00889	0.833333	0.0254	820	1003	0.00327	0.00092	0.0202	0.003175	0.1	0.0508	0.0508	4	2	5	0.100629	0.0211667
McAllister	0.00719667	0.833333	0.0254	820	1003	0.00327	0.00092	0.0202	0.003175	0.1	0.0508	0.0508	4	2	5	0.0996119	0.0211667
McAllister	0.00557953	1.16667	0.0254	820	1003	0.00327	0.00092	0.0202	0.003175	0.1	0.0508	0.0508	4	2	5	0.100167	0.0296333
McAllister	0.00753533	0.833333	0.0254	820	1003	0.00327	0.00092	0.0202	0.003175	0.1	0.0508	0.0508	4	2	5	0.0194731	0.0211667
McAllister	0.00231987	0.833333	0.0230886	874	1196	0.00229	0.001196	0.0195	0.0045212	0.33	0.0508	0.0762	3	2	5	1	0.0192405
McAllister	0.0056642	1	0.0230886	874	1196	0.00229	0.001196	0.0195	0.0045212	0.33	0.0508	0.0762	3	2	5	0.997015	0.0230886
McAllister	0.00471593	1.33333	0.0230886	874	1196	0.00229	0.001196	0.0195	0.0045212	0.33	0.0508	0.0762	3	2	5	0.996416	0.0307848
McAllister	0.00499533	1.66667	0.0230886	874	1196	0.00229	0.001196	0.0195	0.0045212	0.33	0.0508	0.0762	3	2	5	1	0.038481
McAllister	0.0066802	1.66667	0.0230886	874	1196	0.00229	0.001196	0.0195	0.0045212	0.33	0.0508	0.0762	3	2	5	0.997468	0.038481
McAllister	0.00700193	2	0.0230886	874	1196	0.00229	0.001196	0.0195	0.0045212	0.33	0.0508	0.0762	3	2	5	1.96416	0.0461772
McAllister	0.0103293	0.833333	0.0230886	874	1196	0.00229	0.001196	0.0195	0.0045212	0.33	0.1016	0.0762	3	2	5	1	0.0192405
McAllister	0.0121073	1	0.0230886	874	1196	0.00229	0.001196	0.0195	0.0045212	0.33	0.1016	0.0762	3	2	5	1	0.0230886
McAllister	0.0141817	1	0.0230886	874	1196	0.00229	0.001196	0.0195	0.0045212	0.33	0.1016	0.0762	3	2	5	0.998807	0.0230886
McAllister	0.0136737	1.16667	0.0230886	874	1196	0.00229	0.001196	0.0195	0.0045212	0.33	0.1016	0.0762	3	2	5	0.998762	0.0269367
McAllister	0.0141817	1.33333	0.0230886	874	1196	0.00229	0.001196	0.0195	0.0045212	0.33	0.1016	0.0762	3	2	5	0.998807	0.0307848
McAllister	0.00668867	1.66667	0.0230886	874	1196	0.00229	0.001196	0.0195	0.0045212	0.33	0.1016	0.0762	3	2	5	1	0.038481
McAllister	0.0103632	1.66667	0.0230886	837	1100	0.00197	0.00117	0.016	0.0029972	0.23	0.0508	0.0762	3	2	5	1	0.038481
McAllister	0.0193887	1.33333	0.0230886	837	1100	0.00197	0.00117	0.016	0.0029972	0.23	0.0508	0.0762	3	2	5	1	0.0307848
McAllister	0.019812	1.33333	0.0230886	837	1100	0.00197	0.00117	0.016	0.0029972	0.23	0.0508	0.0762	3	2	5	1	0.0307848
McAllister	0.022352	1.16667	0.0230886	837	1100	0.00197	0.00117	0.016	0.0029972	0.23	0.0508	0.0762	3	2	5	1	0.0269367
McAllister	0.021336	1	0.0230886	837	1100	0.00197	0.00117	0.016	0.0029972	0.23	0.0508	0.0762	3	2	5	1	0.0230886
McAllister	0.0268393	1	0.0230886	837	1100	0.00197	0.00117	0.016	0.0029972	0.23	0.0508	0.0762	3	2	5	1	0.0230886
McAllister	0.0258064	0.833333	0.0230886	837	1100	0.00197	0.00117	0.016	0.0029972	0.23	0.0508	0.0762	3	2	5	1	0.0192405
McAllister	0.0237913	0.666667	0.0230886	837	1100	0.00197	0.00117	0.016	0.0029972	0.23	0.0508	0.0762	3	2	5	1	0.0153924
McAllister	0.0141817	1.66667	0.0230886	837	1100	0.00197	0.00117	0.016	0.0029972	0.23	0.0508	0.0762	3	2	5	0.499552	0.038481
McAllister	0.0244687	1.33333	0.0230886	837	1100	0.00197	0.00117	0.016	0.0029972	0.23	0.0508	0.0762	3	2	5	0.497409	0.0307848
McAllister	0.0292972	1	0.0230886	837	1100	0.00197	0.00117	0.016	0.0029972	0.23	0.0508	0.0762	3	2	5	0.501019	0.0230886
McAllister	0.0283633	0.833333	0.0230886	837	1100	0.00197	0.00117	0.016	0.0029972	0.23	0.0508	0.0762	3	2	5	0.502242	0.0192405
McAllister	0.0244687	0.666667	0.0230886	837	1100	0.00197	0.00117	0.016	0.0029972	0.23	0.0508	0.0762	3	2	5	0.497409	0.0153924
McAllister	0.0121073	1.66667	0.0230886	837	1100	0.00197	0.00117	0.016	0.0029972	0.23	0.0508	0.0762	3	2	5	0.25	0.038481
McAllister	0.0138853	1.66667	0.0230886	837	1100	0.00197	0.00117	0.016	0.0029972	0.23	0.0508	0.0762	3	2	5	0.250953	0.038481
McAllister	0.0226907	1.33333	0.0230886	837	1100	0.00197	0.00117	0.016	0.0029972	0.23	0.0508	0.0762	3	2	5	0.25	0.0307848
McAllister	0.0326813	1	0.0230886	837	1100	0.00197	0.00117	0.016	0.0029972	0.23	0.0508	0.0762	3	2	5	0.25	0.0230886
McAllister	0.0334433	1	0.0230886	837	1100	0.00197	0.00117	0.016	0.0029972	0.23	0.0508	0.0762	3	2	5	0.25	0.0230886
McAllister	0.0311573	0.833333	0.0230886	837	1100	0.00197	0.00117	0.016	0.0029972	0.23	0.0508	0.0762	3	2	5	0.25085	0.0192405
McAllister	0.0291253	0.833333	0.0230886	837	1100	0.00197	0.00117	0.016	0.0029972	0.23	0.0508	0.0762	3	2	5	0.25	0.0192405
McAllister	0.0250613	0.666667	0.0230886	837	1100	0.00197	0.00117	0.016	0.0029972	0.23	0.0508	0.0762	3	2	5	0.25	0.0153924
McAllister	0.0131233	1.66667	0.0230886	837	1100	0.00197	0.00117	0.016	0.0029972	0.23	0.0508	0.0762	3	2	5	0.16629	0.038481
McAllister	0.02286	1.33333	0.0230886	837	1100	0.00197	0.00117	0.016	0.0029972	0.23	0.0508	0.0762	3	2	5	0.166307	0.0307848
McAllister	0.0353907	1	0.0230886	837	1100	0.00197	0.00117	0.016	0.0029972	0.23	0.0508	0.0762	3	2	5	0.16662	0.0230886
McAllister	0.036322	0.833333	0.0230886	837	1100	0.00197	0.00117	0.016	0.0029972	0.23	0.0508	0.0762	3	2	5	0.166395	0.0192405
McAllister	0.0291253	0.666667	0.0230886	837	1100	0.00197	0.00117	0.016	0.0029972	0.23	0.0508	0.0762	3	2	5	0.166102	0.0153924
McAllister	0.010033	1.66667	0.0230886	843	1150	0.002	0.00124	0.023	0.0029972	0.23	0.0508	0.0762	3	2	5	0.998314	0.038481
McAllister	0.0146897	1.33333	0.0230886	843	1150	0.002	0.00124	0.023	0.0029972	0.23	0.0508	0.0762	3	2	5	1.00115	0.0307848
McAllister	0.021336	1	0.0230886	843	1150	0.002	0.00124	0.023	0.0029972	0.23	0.0508	0.0762	3	2	5	1	0.0230886
McAllister	0.0187113	0.833333	0.0230886	843	1150	0.002	0.00124	0.023	0.0029972	0.23	0.0508	0.0762	3	2	5	1	0.0192405
McAllister	0.0141817	0.666667	0.0230886	843	1150	0.002	0.00124	0.023	0.0029972	0.23	0.0508	0.0762	3	2	5	1.00119	0.0153924
McAllister	0.0082296	1.66667	0.0230886	843	1150	0.002	0.00124	0.023	0.0029972	0.23	0.0508	0.0762	3	2	5	0.502318	0.038481
McAllister	0.0154517	1.33333	0.0230886	843	1150	0.002	0.00124	0.023	0.0029972	0.23	0.0508	0.0762	3	2	5	0.502058	0.0307848
McAllister	0.0226737	1	0.0230886	843	1150	0.002	0.00124	0.023	0.0029972	0.23	0.0508	0.0762	3	2	5	0.498601	0.0230886
McAllister	0.0206587	0.808333	0.0230886	843	1150	0.002	0.00124	0.023	0.0029972	0.23	0.0508	0.0762	3	2	5	0.496933	0.0186633
McAllister	0.0173567	0.666667	0.0230886	843	1150	0.002	0.00124	0.023	0.0029972	0.23	0.0508	0.0762	3	2	5	0.498538	0.0153924
McAllister	0.0131233	1.66667	0.0230886	843	1150	0.002	0.00124	0.023	0.0029972	0.23	0.0508	0.0762	3	2	5	0.25	0.038481
McAllister	0.0318347	1	0.0230886	843	1150	0.002	0.00124	0.023	0.0029972	0.23	0.0508	0.0762	3	2	5	0.25	0.0230886
McAllister	0.03175	0.833333	0.0230886	843	1150	0.002	0.00124	0.023	0.0029972	0.23	0.0508	0.0762	3	2	5	0.250834	0.0192405
McAllister	0.009017	1.66667	0.0230886	872	1190	0.00227	0.00135	0.026	0.0029972	0.23	0.0508	0.0762	3	2	5	0.251469	0.038481
McAllister	0.0173567	1.33333	0.0230886	872	1190	0.00227	0.00135	0.026	0.0029972	0.23	0.0508	0.0762	3	2	5	0.25	0.0307848
McAllister	0.0250613	1	0.0230886	872	1190	0.00227	0.00135	0.026	0.0029972	0.23	0.0508	0.0762	3	2	5	0.25	0.0230886
McAllister	0.0262467	1	0.0230886	872	1190	0.00227	0.00135	0.026	0.0029972	0.23	0.0508	0.0762	3	2	5	0.25	0.0230886
McAllister	0.0275167	0.666667	0.0230886	872	1190	0.00227	0.00135	0.026	0.0029972	0.23	0.0508	0.0762	3	2	5	0.25	0.0153924
McAllister	0.0115993	1.66667	0.0230886	872	1190	0.00227	0.00135	0.026	0.0029972	0.23	0.0508	0.0762	3	2	5	0.166951	0.038481
McAllister	0.023622	1.16667	0.0230886	872	1190	0.00227	0.00135	0.026	0.0029972	0.23	0.0508	0.0762	3	2	5	0.166876	0.0269367
McAllister	0.018796	1.33333	0.0230886	872	1190	0.00227	0.00135	0.026	0.0029972	0.23	0.0508	0.0762	3	2	5	0.167192	0.0307848
McAllister	0.0286173	1	0.0230886	872	1190	0.00227	0.00135	0.026	0.0029972	0.23	0.0508	0.0762	3	2	5	0.167127	0.0230886
McAllister	0.0291253	0.833333	0.0230886	872	1190	0.00227	0.00135	0.026	0.0029972	0.23	0.0508	0.0762	3	2	5	0.166497	0.0192405
McAllister	0.02921	0.666667	0.0230886	872	1190	0.00227	0.00135	0.026	0.0029972	0.23	0.0508	0.0762	3	2	5	0.167513	0.0153924
McAllister	0.009271	1.66667	0.0230886	814	1000	0.0018	0.001002	0.011	0.0029972	0.23	0.0508	0.0762	4	2	5	2	0.038481
McAllister	0.0167471	1.33333	0.0230886	814	1000	0.0018	0.001002	0.011	0.0029972	0.23	0.0508	0.0762	4	2	5	2.00608	0.0307848
McAllister	0.017018	1.16667	0.0230886	814	1000	0.0018	0.001002	0.011	0.0029972	0.23	0.0508	0.0762	4	2	5	2.02256	0.0269367
McAllister	0.01778	1	0.0230886	814	1000	0.0018	0.001002	0.011	0.0029972	0.23	0.0508	0.0762	4	2	5	2	0.0230886
McAllister	0.018796	0.816667	0.0230886	814	1000	0.0018	0.001002	0.011	0.0029972	0.23	0.0508	0.0762	4	2	5	2	0.0188557
McAllister	0.019939	0.733333	0.0230886	814	1000	0.0018	0.001002	0.011	0.0029972	0.23	0.0508	0.0762	4	2	5	1.96226	0.0169316
McAllister	0.010541	1.66667	0.0230886	814	1000	0.0018	0.001002	0.011	0.0029972	0.23	0.0508	0.0762	4	2	5	0.998395	0.038481
McAllister	0.0133773	1.48333	0.0230886	814	1000	0.0018	0.001002	0.011	0.0029972	0.23	0.0508	0.0762	4	2	5	1	0.0342481
McAllister	0.01778	1.33333	0.0230886	814	1000	0.0018	0.001002	0.011	0.0029972	0.23	0.0508	0.0762	4	2	5	1	0.0307848
McAllister	0.019558	1.16667	0.0230886	814	1000	0.0018	0.001002	0.011	0.0029972	0.23	0.0508	0.0762	4	2	5	1	0.0269367
McAllister	0.01905	1.16667	0.0230886	814	1000	0.0018	0.001002	0.011	0.0029972	0.23	0.0508	0.0762	4	2	5	1	0.0269367
McAllister	0.0212513	1	0.0230886	814	1000	0.0018	0.001002	0.011	0.0029972	0.23	0.0508	0.0762	4	2	5	1	0.0230886
McAllister	0.0224367	1	0.0230886	814	1000	0.0018	0.001002	0.011	0.0029972	0.23	0.0508	0.0762	4	2	5	1	0.0230886
McAllister	0.0214207	0.866667	0.0230886	814	1000	0.0018	0.001002	0.011	0.0029972	0.23	0.0508	0.0762	4	2	5	1	0.0200101
McAllister	0.02032	0.85	0.0230886	814	1000	0.0018	0.001002	0.011	0.0029972	0.23	0.0508	0.0762	4	2	5	1	0.0196253
McAllister	0.0224367	0.75	0.0230886	814	1000	0.0018	0.001002	0.011	0.0029972	0.23	0.0508	0.0762	4	2	5	1	0.0173165
McAllister	0.018669	0.716667	0.0230886	814	1000	0.0018	0.001002	0.011	0.0029972	0.23	0.0508	0.0762	4	2	5	1.00091	0.0165468
McAllister	0.0198543	0.583333	0.0230886	814	1000	0.0018	0.001002	0.011	0.0029972	0.23	0.0508	0.0762	4	2	5	1.00085	0.0134684
McAllister	0.011557	1.66667	0.0230886	814	1000	0.0018	0.001002	0.011	0.0029972	0.23	0.0508	0.0762	4	2	5	0.5	0.038481
McAllister	0.0206163	1.33333	0.0230886	814	1000	0.0018	0.001002	0.011	0.0029972	0.23	0.0508	0.0762	4	2	5	0.500308	0.0307848
McAllister	0.0262467	1	0.0230886	814	1000	0.0018	0.001002	0.011	0.0029972	0.23	0.0508	0.0762	4	2	5	0.501211	0.0230886
McAllister	0.0283633	0.75	0.0230886	814	1000	0.0018	0.001002	0.011	0.0029972	0.23	0.0508	0.0762	4	2	5	0.498881	0.0173165
McAllister	0.0173143	0.416667	0.0254	814	1000	0.00163	0.001	0.0105	0.003175	0.1	0.0508	0.048768	1	2	5	1.81293	0.0105833
McAllister	0.0155025	0.583333	0.0254	814	1000	0.00163	0.001	0.0105	0.003175	0.1	0.0508	0.048768	1	2	5	1.8126	0.0148167
McAllister	0.0079248	0.833333	0.0254	814	1000	0.00163	0.001	0.0105	0.003175	0.1	0.0508	0.048768	1	2	5	1.81928	0.0211667
McAllister	0.00339513	1.16667	0.0254	814	1000	0.00163	0.001	0.0105	0.003175	0.1	0.0508	0.048768	1	2	5	1.81404	0.0296333
McAllister	0.0257979	0.583333	0.0254	814	1000	0.00163	0.001	0.0105	0.0047752	0.23	0.0508	0.048768	1	2	5	1.49959	0.0148167
McAllister	0.0201507	0.833333	0.0254	760	1063	0.00145	0.00096	0.016	0.003175	0.1	0.0508	0.048768	2	2	5	0.966942	0.0211667
McAllister	0.0092202	1.16667	0.0254	760	1063	0.00145	0.00096	0.016	0.003175	0.1	0.0508	0.048768	2	2	5	0.969259	0.0296333
McAllister	0.00428413	1.5	0.0254	760	1063	0.00145	0.00096	0.016	0.003175	0.1	0.0508	0.048768	2	2	5	0.968872	0.0381
McAllister	0.0107527	0.833333	0.0254	757	997	0.00142	0.001	0.0158	0.003175	0.1	0.0508	0.048768	1	2	5	0.248771	0.0211667
McAllister	0.006223	1.16667	0.0254	757	997	0.00142	0.001	0.0158	0.003175	0.1	0.0508	0.048768	1	2	5	0.25	0.0296333
McAllister	0.00367453	1.5	0.0254	757	997	0.00142	0.001	0.0158	0.003175	0.1	0.0508	0.048768	1	2	5	0.252525	0.0381
McAllister	0.0179832	0.5	0.0254	870	1050	0.00241	0.001	0.0204	0.003175	0.1	0.0508	0.0508	2	2	5	4.39086	0.0127
McAllister	0.0105664	0.833333	0.0254	870	1050	0.00241	0.001	0.0204	0.003175	0.1	0.0508	0.0508	2	2	5	4.03226	0.0211667
McAllister	0.00790194	1.16667	0.0254	870	1050	0.00241	0.001	0.0204	0.003175	0.1	0.0508	0.0508	2	2	5	4.38546	0.0296333
McAllister	0.0165269	0.5	0.0254	870	1050	0.00241	0.001	0.0204	0.003175	0.1	0.0508	0.0508	2	2	5	4.39227	0.0127
McAllister	0.00982557	0.833333	0.0254	870	1050	0.00241	0.001	0.0204	0.003175	0.1	0.0508	0.0508	2	2	5	4.38515	0.0211667
McAllister	0.0073406	1.16667	0.0254	870	1050	0.00241	0.001	0.0204	0.003175	0.1	0.0508	0.0508	2	2	5	4.38509	0.0296333
McAllister	0.0049784	0.583333	0.0254	870	1010	0.0026	0.00103	0.0151	0.003175	0.1	0.0508	0.0508	1	2	5	0.2	0.0148167
McAllister	0.0032004	0.833333	0.0254	870	1010	0.0026	0.00103	0.0151	0.003175	0.1	0.0508	0.0508	1	2	5	0.206126	0.0211667
McAllister	0.00547793	0.583333	0.0254	870	1010	0.0026	0.00103	0.0151	0.003175	0.1	0.0508	0.0508	1	2	5	0.200148	0.0148167
McAllister	0.0039624	0.583333	0.0254	850	1090	0.00128	0.0014	0.001	0.003175	0.1	0.0508	0.0508	1	2	5	0.303621	0.0148167
McAllister	0.00328507	0.833333	0.0254	850	1090	0.00128	0.0014	0.001	0.003175	0.1	0.0508	0.0508	1	2	5	0.302013	0.0211667
McAllister	0.0098806	0.583333	0.0254	814	1060	0.00163	0.00112	0.0105	0.003175	0.23	0.0508	0.0508	2	2	6	1.49359	0.0148167
McAllister	0.00603673	0.833333	0.0254	814	1060	0.00163	0.00112	0.0105	0.003175	0.23	0.0508	0.0508	2	2	6	1.49301	0.0211667
McAllister	0.0098806	0.583333	0.0254	814	1060	0.00163	0.00112	0.0105	0.003175	0.23	0.0508	0.0508	2	2	6	1.49359	0.0148167
McAllister	0.00767927	0.833333	0.0254	814	1060	0.00163	0.00112	0.0105	0.003175	0.23	0.0508	0.0508	2	2	6	1.49176	0.0211667
McAllister	0.00631613	0.583333	0.0254	814	1060	0.00163	0.00112	0.0105	0.003175	0.1	0.0508	0.0508	2	2	6	1.49498	0.0148167
McAllister	0.00395393	0.833333	0.0254	814	1060	0.00163	0.00112	0.0105	0.003175	0.1	0.0508	0.0508	2	2	6	1.49733	0.0211667
McAllister	0.0173228	0.583333	0.0254	814	1060	0.00163	0.00112	0.0105	0.003175	0.23	0.0508	0.0508	2	2	5	0.451064	0.0148167
McAllister	0.00994833	0.833333	0.0254	814	1060	0.00163	0.00112	0.0105	0.003175	0.23	0.0508	0.0508	2	2	5	0.45241	0.0211667
McAllister	0.0131487	0.583333	0.0254	814	1060	0.00163	0.00112	0.0105	0.003175	0.1	0.0508	0.0508	2	2	5	0.451402	0.0148167
McAllister	0.0089408	0.833333	0.0254	814	1060	0.00163	0.00112	0.0105	0.003175	0.1	0.0508	0.0508	2	2	5	0.452545	0.0211667
McAllister	0.0108204	1	0.0230886	814	1001	0.0018	0.001002	0.0112	0.0045212	0.33	0.0508	0.0762	1	2	5	1	0.0230886
McAllister	0.0126153	1.33333	0.0230886	814	1001	0.0018	0.001002	0.0112	0.0045212	0.33	0.0508	0.0762	1	2	5	1	0.0307848
McAllister	0.0135043	1.33333	0.0230886	814	1001	0.0018	0.001002	0.0112	0.0045212	0.33	0.0508	0.0762	1	2	5	0.998747	0.0307848
McAllister	0.0135043	1.5	0.0230886	814	1001	0.0018	0.001002	0.0112	0.0045212	0.33	0.0508	0.0762	1	2	5	0.998747	0.0346329
McAllister	0.0118957	1.66667	0.0230886	814	1001	0.0018	0.001002	0.0112	0.0045212	0.33	0.0508	0.0762	1	2	5	1.00142	0.038481
McAllister	0.0202353	0.566667	0.0230886	814	1001	0.0018	0.001002	0.0112	0.0029972	0.23	0.0508	0.0762	1	2	5	1	0.0130835
McAllister	0.0202353	0.816667	0.0230886	814	1001	0.0018	0.001002	0.0112	0.0029972	0.23	0.0508	0.0762	1	2	5	1	0.0188557
McAllister	0.0171027	1	0.0230886	814	1001	0.0018	0.001002	0.0112	0.0029972	0.23	0.0508	0.0762	1	2	5	1	0.0230886
McAllister	0.0064262	1.66667	0.0230886	814	1001	0.0018	0.001002	0.0112	0.0029972	0.23	0.0508	0.0762	1	2	5	1.00264	0.038481
McAllister	0.013208	1.66667	0.0230886	814	1098	0.0018	0.00115	0.0112	0.0029972	0.23	0.0508	0.0762	2	2	5	2	0.038481
McAllister	0.0242147	1.33333	0.0230886	814	1098	0.0018	0.00115	0.0112	0.0029972	0.23	0.0508	0.0762	2	2	5	2.00105	0.0307848
McAllister	0.0331047	1	0.0230886	814	1098	0.0018	0.00115	0.0112	0.0029972	0.23	0.0508	0.0762	2	2	5	2.00769	0.0230886
McAllister	0.03048	0.833333	0.0230886	814	1098	0.0018	0.00115	0.0112	0.0029972	0.23	0.0508	0.0762	2	2	5	2	0.0192405
McAllister	0.025146	0.666667	0.0230886	814	1098	0.0018	0.00115	0.0112	0.0029972	0.23	0.0508	0.0762	2	2	5	2	0.0153924
McAllister	0.0164253	1.66667	0.0230886	814	1098	0.0018	0.00115	0.0112	0.0029972	0.23	0.0508	0.0762	2	2	5	1	0.038481
McAllister	0.0295487	1.33333	0.0230886	814	1098	0.0018	0.00115	0.0112	0.0029972	0.23	0.0508	0.0762	2	2	5	1	0.0307848
McAllister	0.0343747	1	0.0230886	814	1098	0.0018	0.00115	0.0112	0.0029972	0.23	0.0508	0.0762	2	2	5	1	0.0230886
McAllister	0.0321733	0.833333	0.0230886	814	1098	0.0018	0.00115	0.0112	0.0029972	0.23	0.0508	0.0762	2	2	5	1	0.0192405
McAllister	0.026416	0.666667	0.0230886	814	1098	0.0018	0.00115	0.0112	0.0029972	0.23	0.0508	0.0762	2	2	5	1	0.0153924
McAllister	0.0178647	1.66667	0.0230886	814	1098	0.0018	0.00115	0.0112	0.0029972	0.23	0.0508	0.0762	2	2	5	0.24926	0.038481
McAllister	0.0254847	1.33333	0.0230886	814	1098	0.0018	0.00115	0.0112	0.0029972	0.23	0.0508	0.0762	2	2	5	0.25	0.0307848
McAllister	0.0343747	1	0.0230886	814	1098	0.0018	0.00115	0.0112	0.0029972	0.23	0.0508	0.0762	2	2	5	0.25386	0.0230886
McAllister	0.0303107	0.833333	0.0230886	814	1098	0.0018	0.00115	0.0112	0.0029972	0.23	0.0508	0.0762	2	2	5	0.250874	0.0192405
McAllister	0.028956	0.666667	0.0230886	814	1098	0.0018	0.00115	0.0112	0.0029972	0.23	0.0508	0.0762	2	2	5	0.249087	0.0153924
McAllister	0.0154093	1.66667	0.0230886	814	1098	0.0018	0.00115	0.0112	0.0029972	0.23	0.0508	0.0762	2	2	5	0.4	0.038481
McAllister	0.0211667	1.66667	0.0230886	814	1098	0.0018	0.00115	0.0112	0.0029972	0.23	0.0508	0.0762	2	2	5	0.40056	0.038481
McAllister	0.0288713	1.33333	0.0230886	814	1098	0.0018	0.00115	0.0112	0.0029972	0.23	0.0508	0.0762	2	2	5	0.402138	0.0307848
McAllister	0.036068	1	0.0230886	814	1098	0.0018	0.00115	0.0112	0.0029972	0.23	0.0508	0.0762	2	2	5	0.401316	0.0230886
McAllister	0.0334433	0.833333	0.0230886	814	1098	0.0018	0.00115	0.0112	0.0029972	0.23	0.0508	0.0762	2	2	5	0.400709	0.0192405
McAllister	0.0263313	0.666667	0.0230886	814	1098	0.0018	0.00115	0.0112	0.0029972	0.23	0.0508	0.0762	2	2	5	0.400901	0.0153924
McAllister	0.0283633	0.908333	0.0230886	814	1098	0.0018	0.00115	0.0112	0.0029972	0.23	0.0508	0.0762	2	2	5	1	0.0209721
McAllister	0.0276013	0.833333	0.0230886	814	1098	0.0018	0.00115	0.0112	0.0029972	0.23	0.0508	0.0762	2	2	5	1	0.0192405
McAllister	0.0258064	0.666667	0.0230886	814	1098	0.0018	0.00115	0.0112	0.0029972	0.23	0.0508	0.0762	2	2	5	1	0.0153924
McAllister	0.0141817	1.66667	0.0230886	814	1098	0.0018	0.00115	0.0112	0.0029972	0.23	0.0508	0.0762	2	2	5	0.499552	0.038481
McAllister	0.0141817	1.66667	0.0230886	814	1098	0.0018	0.00115	0.0112	0.0029972	0.23	0.0508	0.0762	2	2	5	0.499552	0.038481
McAllister	0.0267547	1.33333	0.0230886	814	1098	0.0018	0.00115	0.0112	0.0029972	0.23	0.0508	0.0762	2	2	5	0.501188	0.0307848
McAllister	0.0292947	1.33333	0.0230886	814	1098	0.0018	0.00115	0.0112	0.0029972	0.23	0.0508	0.0762	2	2	5	0.501085	0.0307848
McAllister	0.034544	1	0.0230886	814	1098	0.0018	0.00115	0.0112	0.0029972	0.23	0.0508	0.0762	2	2	5	0.5	0.0230886
McAllister	0.0334433	0.916667	0.0230886	814	1098	0.0018	0.00115	0.0112	0.0029972	0.23	0.0508	0.0762	2	2	5	0.501901	0.0211646
McAllister	0.033528	0.833333	0.0230886	814	1098	0.0018	0.00115	0.0112	0.0029972	0.23	0.0508	0.0762	2	2	5	0.5	0.0192405
McAllister	0.0316653	0.833333	0.0230886	814	1098	0.0018	0.00115	0.0112	0.0029972	0.23	0.0508	0.0762	2	2	5	0.498998	0.0192405
McAllister	0.0267547	0.666667	0.0230886	814	1098	0.0018	0.00115	0.0112	0.0029972	0.23	0.0508	0.0762	2	2	5	0.501188	0.0153924
McAllister	0.029972	0.666667	0.0230886	814	1098	0.0018	0.00115	0.0112	0.0029972	0.23	0.0508	0.0762	2	2	5	0.25	0.0153924
McAllister	0.015748	1.66667	0.0230886	814	1098	0.0018	0.00115	0.0112	0.0029972	0.23	0.0508	0.0762	2	2	5	0.249161	0.038481
McAllister	0.0308187	1.33333	0.0230886	814	1098	0.0018	0.00115	0.0112	0.0029972	0.23	0.0508	0.0762	2	2	5	0.200132	0.0307848
McAllister	0.0371687	1	0.0230886	814	1098	0.0018	0.00115	0.0112	0.0029972	0.23	0.0508	0.0762	2	2	5	0.199454	0.0230886
McAllister	0.0331047	0.666667	0.0230886	814	1098	0.0018	0.00115	0.0112	0.0029972	0.23	0.0508	0.0762	2	2	5	0.200123	0.0153924
McAllister	0.00643467	1.66667	0.0230886	814	1001	0.0018	0.001002	0.0112	0.0029972	0.23	0.0508	0.0762	1	2	5	1	0.038481
McAllister	0.00720513	1.33333	0.0230886	814	1001	0.0018	0.001002	0.0112	0.0029972	0.23	0.0508	0.0762	1	2	5	0.997653	0.0307848
McAllister	0.017018	1	0.0230886	814	1001	0.0018	0.001002	0.0112	0.0029972	0.23	0.0508	0.0762	1	2	5	1	0.0230886
McAllister	0.020066	0.833333	0.0230886	814	1001	0.0018	0.001002	0.0112	0.0029972	0.23	0.0508	0.0762	1	2	5	1	0.0192405
McAllister	0.020066	0.566667	0.0230886	814	1001	0.0018	0.001002	0.0112	0.0029972	0.23	0.0508	0.0762	1	2	5	1	0.0130835
McAllister	0.009525	1.7	0.0230886	814	1001	0.0018	0.001002	0.0112	0.0029972	0.23	0.0508	0.0762	1	2	5	0.5	0.0392506
McAllister	0.0151977	1.33333	0.0230886	814	1001	0.0018	0.001002	0.0112	0.0029972	0.23	0.0508	0.0762	1	2	5	0.500836	0.0307848
McAllister	0.0239607	1	0.0230886	814	1001	0.0018	0.001002	0.0112	0.0029972	0.23	0.0508	0.0762	1	2	5	0.497354	0.0230886
McAllister	0.0254847	0.666667	0.0230886	814	1001	0.0018	0.001002	0.0112	0.0029972	0.23	0.0508	0.0762	1	2	5	0.501247	0.0153924
McAllister	0.0077216	1.66667	0.0230886	814	1001	0.0018	0.001002	0.0112	0.0029972	0.23	0.0508	0.0762	1	2	5	1	0.038481
McAllister	0.0136398	1.33333	0.0230886	814	1001	0.0018	0.001002	0.0112	0.0029972	0.23	0.0508	0.0762	1	2	5	0.998759	0.0307848
McAllister	0.02032	1	0.0230886	814	1001	0.0018	0.001002	0.0112	0.0029972	0.23	0.0508	0.0762	1	2	5	1	0.0230886
McAllister	0.025908	0.666667	0.0230886	814	1001	0.0018	0.001002	0.0112	0.0029972	0.23	0.0508	0.0762	1	2	5	1	0.0153924
McAllister	0.009271	1.5	0.0230886	814	1001	0.0018	0.001002	0.0112	0.0029972	0.23	0.0508	0.0762	1	2	5	1.00183	0.0346329
McAllister	0.009271	1.33333	0.0230886	814	1001	0.0018	0.001002	0.0112	0.0029972	0.23	0.0508	0.0762	1	2	5	1.00183	0.0307848
McAllister	0.019304	1	0.0230886	814	1001	0.0018	0.001002	0.0112	0.0029972	0.23	0.0508	0.0762	1	2	5	1	0.0230886
McAllister	0.00745067	1.66667	0.0230886	814	1001	0.0018	0.001002	0.0112	0.0029972	0.23	0.0508	0.0762	1	2	5	2.0137	0.038481
McAllister	0.014732	1.33333	0.0230886	814	1001	0.0018	0.001002	0.0112	0.0029972	0.23	0.0508	0.0762	1	2	5	1.69767	0.0307848
McAllister	0.020828	1	0.0230886	814	1001	0.0018	0.001002	0.0112	0.0029972	0.23	0.0508	0.0762	1	2	5	2	0.0230886
McAllister	0.0231987	0.666667	0.0230886	814	1001	0.0018	0.001002	0.0112	0.0029972	0.23	0.0508	0.0762	1	2	5	1.97826	0.0153924
McAllister	0.009525	1.66667	0.0230886	814	1001	0.0018	0.001002	0.0112	0.0029972	0.23	0.0508	0.0762	1	2	5	0.998224	0.038481
McAllister	0.0154517	1.33333	0.0230886	814	1001	0.0018	0.001002	0.0112	0.0029972	0.23	0.0508	0.0762	1	2	5	0.998905	0.0307848
McAllister	0.022098	1	0.0230886	814	1001	0.0018	0.001002	0.0112	0.0029972	0.23	0.0508	0.0762	1	2	5	1	0.0230886
McAllister	0.025908	0.833333	0.0230886	814	1001	0.0018	0.001002	0.0112	0.0029972	0.23	0.0508	0.0762	1	2	5	1	0.0192405
McAllister	0.0225213	0.666667	0.0230886	814	1001	0.0018	0.001002	0.0112	0.0029972	0.23	0.0508	0.0762	1	2	5	1	0.0153924
McAllister	0.00859367	1.66667	0.0230886	814	1001	0.0018	0.001002	0.0112	0.0029972	0.23	0.0508	0.0762	1	2	5	0.499261	0.038481
McAllister	0.0160867	1.33333	0.0230886	814	1001	0.0018	0.001002	0.0112	0.0029972	0.23	0.0508	0.0762	1	2	5	0.498423	0.0307848
McAllister	0.0258064	1	0.0230886	814	1001	0.0018	0.001002	0.0112	0.0029972	0.23	0.0508	0.0762	1	2	5	0.499262	0.0230886
McAllister	0.0270087	0.833333	0.0230886	814	1001	0.0018	0.001002	0.0112	0.0029972	0.23	0.0508	0.0762	1	2	5	0.497653	0.0192405
McAllister	0.0226907	0.666667	0.0230886	814	1001	0.0018	0.001002	0.0112	0.0029972	0.23	0.0508	0.0762	1	2	5	0.498044	0.0153924
McAllister	0.0278553	1.33333	0.0230886	814	1098	0.0018	0.00115	0.0112	0.0029972	0.23	0.0508	0.0762	2	2	5	2.00457	0.0307848
McAllister	0.034544	1.01667	0.0230886	814	1098	0.0018	0.00115	0.0112	0.0029972	0.23	0.0508	0.0762	2	2	5	2	0.0234734
McAllister	0.0283633	0.666667	0.0230886	814	1098	0.0018	0.00115	0.0112	0.0029972	0.23	0.0508	0.0762	2	2	5	2.00448	0.0153924
McAllister	0.0321733	0.833333	0.0230886	814	1098	0.0018	0.00115	0.0112	0.0029972	0.23	0.0508	0.0762	2	2	5	2.01109	0.0192405
McAllister	0.0141817	1.66667	0.0230886	814	1098	0.0018	0.00115	0.0112	0.0029972	0.23	0.0508	0.0762	2	2	5	2.00179	0.038481
McAllister	0.0352213	0.666667	0.0230886	814	1098	0.0018	0.00115	0.0112	0.0029972	0.23	0.0508	0.0762	2	2	5	4.98561	0.0153924
McAllister	0.037084	1	0.0230886	814	1098	0.0018	0.00115	0.0112	0.0029972	0.23	0.0508	0.0762	2	2	5	5	0.0230886
McAllister	0.037084	1	0.0230886	814	1098	0.0018	0.00115	0.0112	0.0029972	0.23	0.0508	0.0762	2	2	5	5.08333	0.0230886
McAllister	0.0296333	1.33333	0.0230886	814	1098	0.0018	0.00115	0.0112	0.0029972	0.23	0.0508	0.0762	2	2	5	5.01375	0.0307848
McAllister	0.0352213	0.833333	0.0230886	814	1098	0.0018	0.00115	0.0112	0.0029972	0.23	0.0508	0.0762	2	2	5	5.00289	0.0192405
McAllister	0.0206587	1.66667	0.0230886	814	1098	0.0018	0.00115	0.0112	0.0029972	0.23	0.0508	0.0762	2	2	5	5.02469	0.038481
McAllister	0.009271	1.33333	0.0230886	814	1001	0.0018	0.001002	0.0112	0.0029972	0.23	0.0508	0.0762	1	2	5	1.00183	0.0307848
McAllister	0.01651	1.01667	0.0230886	814	1001	0.0018	0.001002	0.0112	0.0029972	0.23	0.0508	0.0762	1	2	5	1	0.0234734
McAllister	0.01651	1.01667	0.0230886	814	1001	0.0018	0.001002	0.0112	0.0029972	0.23	0.0508	0.0762	1	2	5	1	0.0234734
McAllister	0.009271	1.33333	0.0230886	814	1001	0.0018	0.001002	0.0112	0.0029972	0.23	0.0508	0.0762	1	2	5	1.00183	0.0307848
McAllister	0.0206587	0.833333	0.0230886	814	1001	0.0018	0.001002	0.0112	0.0029972	0.23	0.0508	0.0762	1	2	5	1	0.0192405
McAllister	0.021336	0.666667	0.0230886	814	1001	0.0018	0.001002	0.0112	0.0029972	0.23	0.0508	0.0762	1	2	5	1	0.0153924
McAllister	0.00643467	1.66667	0.0230886	814	1001	0.0018	0.001002	0.0112	0.0029972	0.23	0.0508	0.0762	1	2	5	0.909548	0.038481
McAllister	0.009271	1.33333	0.0230886	814	1001	0.0018	0.001002	0.0112	0.0029972	0.23	0.0508	0.0762	1	2	5	0.852792	0.0307848
McAllister	0.01651	1	0.0230886	814	1001	0.0018	0.001002	0.0112	0.0029972	0.23	0.0508	0.0762	1	2	5	1	0.0230886
McAllister	0.0171111	3.33333	0.00635	780	1403	0.00133	0.0222	0.0189	0.0028194	0.23	0.0492252	0.0254508	4	2	34	3.33691	0.0211667
McAllister	0.0171111	2.76667	0.00635	780	1403	0.00133	0.0222	0.0189	0.0028194	0.23	0.0492252	0.0254508	4	2	34	3.33691	0.0175683
McAllister	0.0164592	2.4	0.00635	780	1403	0.00133	0.0222	0.0189	0.0028194	0.23	0.0492252	0.0254508	4	2	34	3.17167	0.01524
McAllister	0.0151384	2.1	0.00635	780	1403	0.00133	0.0222	0.0189	0.0028194	0.23	0.0492252	0.0254508	4	2	34	2.83691	0.013335
McAllister	0.0143171	1.8	0.00635	780	1403	0.00133	0.0222	0.0189	0.0028194	0.23	0.0492252	0.0254508	4	2	34	2.62876	0.01143
McAllister	0.0124206	1.66667	0.00635	780	1403	0.00133	0.0222	0.0189	0.0028194	0.23	0.0492252	0.0254508	4	2	34	2.14807	0.0105833
McAllister	0.0107188	1.26667	0.00635	780	1403	0.00133	0.0222	0.0189	0.0028194	0.23	0.0492252	0.0254508	4	2	34	1.71674	0.00804333
McAllister	0.00987213	1.1	0.00635	780	1403	0.00133	0.0222	0.0189	0.0028194	0.23	0.0492252	0.0254508	4	2	34	1.50215	0.006985
McAllister	0.00706967	0.7	0.00635	780	1403	0.00133	0.0222	0.0189	0.0028194	0.23	0.0492252	0.0254508	4	2	34	0.791845	0.004445
McAllister	0.00516382	0.466667	0.00635	780	1403	0.00133	0.0222	0.0189	0.0028194	0.23	0.0492252	0.0254508	4	2	34	0.308798	0.00296333
McAllister	0.0152908	4	0.0127	780	1403	0.00133	0.0222	0.0189	0.0028194	0.23	0.0492252	0.0254508	4	2	34	2.87554	0.0508
McAllister	0.0167979	3.33333	0.0127	780	1403	0.00133	0.0222	0.0189	0.0028194	0.23	0.0492252	0.0254508	4	2	34	3.25751	0.0423333
McAllister	0.0174244	2.81667	0.0127	780	1403	0.00133	0.0222	0.0189	0.0028194	0.23	0.0492252	0.0254508	4	2	34	3.41631	0.0357717
McAllister	0.0185335	2.33333	0.0127	780	1403	0.00133	0.0222	0.0189	0.0028194	0.23	0.0492252	0.0254508	4	2	34	3.69742	0.0296333
McAllister	0.0187621	1.93333	0.0127	780	1403	0.00133	0.0222	0.0189	0.0028194	0.23	0.0492252	0.0254508	4	2	34	3.75536	0.0245533
McAllister	0.0176784	1.66667	0.0127	780	1403	0.00133	0.0222	0.0189	0.0028194	0.23	0.0492252	0.0254508	4	2	34	3.48069	0.0211667
McAllister	0.0143171	1.03333	0.0127	780	1403	0.00133	0.0222	0.0189	0.0028194	0.23	0.0492252	0.0254508	4	2	34	2.62876	0.0131233
McAllister	0.0139954	1.03333	0.0127	780	1403	0.00133	0.0222	0.0189	0.0028194	0.23	0.0492252	0.0254508	4	2	34	2.54721	0.0131233
McAllister	0.0103632	0.666667	0.0127	780	1403	0.00133	0.0222	0.0189	0.0028194	0.23	0.0492252	0.0254508	4	2	34	1.62661	0.00846667
McAllister	0.00526288	0.333333	0.0127	780	1403	0.00133	0.0222	0.0189	0.0028194	0.23	0.0492252	0.0254508	4	2	34	0.333906	0.00423333
McAllister	0.0171196	2.26667	0.0254	780	1403	0.00133	0.0222	0.0189	0.0028194	0.23	0.0492252	0.0254508	4	2	34	3.33906	0.0575733
McAllister	0.0190923	1.8	0.0254	780	1403	0.00133	0.0222	0.0189	0.0028194	0.23	0.0492252	0.0254508	4	2	34	3.83906	0.04572
McAllister	0.0207179	1.43333	0.0254	780	1403	0.00133	0.0222	0.0189	0.0028194	0.23	0.0492252	0.0254508	4	2	34	4.25107	0.0364067
McAllister	0.0197527	1.13333	0.0254	780	1403	0.00133	0.0222	0.0189	0.0028194	0.23	0.0492252	0.0254508	4	2	34	4.00644	0.0287867
McAllister	0.0190923	0.933333	0.0254	780	1403	0.00133	0.0222	0.0189	0.0028194	0.23	0.0492252	0.0254508	4	2	34	3.83906	0.0237067
McAllister	0.0144695	0.666667	0.0254	780	1403	0.00133	0.0222	0.0189	0.0028194	0.23	0.0492252	0.0254508	4	2	34	2.66738	0.0169333
McAllister	0.0102023	0.466667	0.0254	780	1403	0.00133	0.0222	0.0189	0.0028194	0.23	0.0492252	0.0254508	4	2	34	1.58584	0.0118533
McAllister	0.00877993	0.4	0.0254	780	1403	0.00133	0.0222	0.0189	0.0028194	0.23	0.0492252	0.0254508	4	2	34	1.22532	0.01016
McAllister	0.00475827	1.41667	0.01524	950	1088	0.00133	0.00098	0.0145	0.0044704	0.294	0.027178	0.0762	4	2	35	0.137652	0.02159
McAllister	0.00949113	1.08333	0.01524	950	1088	0.00308	0.00098	0.0145	0.0044704	0.294	0.027178	0.0762	4	2	35	0.136917	0.01651
McAllister	0.00475827	1.41667	0.01524	950	1088	0.00308	0.00098	0.0145	0.004953	0.237	0.0286766	0.0762	4	2	35	0.137652	0.02159
McAllister	0.00949113	1.08333	0.01524	950	1088	0.00308	0.00098	0.0145	0.004953	0.237	0.0286766	0.0762	4	2	36	0.136917	0.01651
McAllister	0.00475827	1.41667	0.01524	950	1088	0.00308	0.00098	0.0145	0.004953	0.237	0.0291338	0.0762	4	2	37	0.137652	0.02159
McAllister	0.00949113	1.08333	0.01524	950	1088	0.00308	0.00098	0.0145	0.004953	0.237	0.0291338	0.0762	4	2	37	0.136917	0.01651
McAllister	0.00475827	1.38333	0.01524	950	1088	0.00308	0.00098	0.0145	0.004699	0.303	0.027432	0.0762	4	2	38	0.137652	0.021082
McAllister	0.00475827	1.41667	0.01524	950	1088	0.00308	0.00098	0.0145	0.004699	0.303	0.0286512	0.0762	4	2	39	0.137652	0.02159
McAllister	0.00475827	1.33333	0.01524	950	1088	0.00308	0.00098	0.0145	0.0044958	0.297	0.0277876	0.0762	4	2	40	0.137652	0.02032
McAllister	0.00949113	0.916667	0.01524	950	1088	0.00308	0.00098	0.0145	0.0044958	0.297	0.0277876	0.0762	4	2	40	0.136917	0.01397
McAllister	0.00475827	1.33333	0.01524	950	1088	0.00308	0.00098	0.0145	0.004445	0.2	0.0265938	0.0762	4	2	41	0.137652	0.02032
McAllister	0.00475827	1.33333	0.01524	950	1088	0.00308	0.00098	0.0145	0.004318	0.274	0.0277876	0.0762	4	2	42	0.137652	0.02032
McAllister	0.00949113	0.916667	0.01524	950	1088	0.00308	0.00098	0.0145	0.004318	0.274	0.0277876	0.0762	4	2	42	0.136917	0.01397
McAllister	0.00475827	1.5	0.01524	950	1088	0.00308	0.00098	0.0145	0.0047752	0.274	0.027432	0.0762	4	2	43	0.137652	0.02286
McAllister	0.00949113	1.16667	0.01524	950	1088	0.00308	0.00098	0.0145	0.0047752	0.274	0.027432	0.0762	4	2	43	0.136917	0.01778
McAllister	0.00475827	1.5	0.01524	950	1088	0.00308	0.00098	0.0145	0.004191	0.258	0.0276098	0.0762	4	2	44	0.137652	0.02286
McAllister	0.00949113	1.16667	0.01524	950	1088	0.00308	0.00098	0.0145	0.004191	0.258	0.0276098	0.0762	4	2	44	0.136917	0.01778
McAllister	0.00475827	1.41667	0.01524	950	1088	0.00308	0.00098	0.0145	0.0047752	0.333	0.0276098	0.0762	4	2	45	0.137652	0.02159
McAllister	0.00949113	1.16667	0.01524	950	1088	0.00308	0.00098	0.0145	0.0047752	0.333	0.0276098	0.0762	4	2	45	0.136917	0.01778
McAllister	0.00475827	1.46667	0.01524	950	1088	0.00308	0.00098	0.0145	0.0047752	0.333	0.02794	0.0762	4	2	46	0.137652	0.022352
McAllister	0.00475827	1.41667	0.01524	950	1088	0.00308	0.00098	0.0145	0.004318	0.274	0.02794	0.0762	4	2	47	0.137652	0.02159
McAllister	0.00475827	1.16667	0.01524	950	1088	0.00308	0.00098	0.0145	0.004572	0.212	0.036322	0.0762	4	2	48	0.137652	0.01778
McAllister	0.00475827	1.33333	0.01524	950	1088	0.00308	0.00098	0.0145	0.004445	0.154	0.030734	0.0762	4	2	49	0.137652	0.02032
McAllister	0.00949113	1	0.01524	950	1088	0.00308	0.00098	0.0145	0.004445	0.154	0.030734	0.0762	4	2	49	0.136917	0.01524
McAllister	0.00475827	1.3	0.01524	950	1088	0.00308	0.00098	0.0145	0.004445	0.154	0.030734	0.0762	4	2	50	0.137652	0.019812
McAllister	0.00475827	1.5	0.01524	929	1072	0.00289	0.00102	0.013	0.00635	0.405	0.027178	0.0762	4	2	51	0.137652	0.02286
McAllister	0.00475827	1.38333	0.01524	929	1072	0.00289	0.00102	0.013	0.0047752	0.41	0.027178	0.0762	4	2	51	0.137652	0.021082
McAllister	0.00475827	1.5	0.01524	929	1072	0.00289	0.00102	0.013	0.0044704	0.294	0.027178	0.0762	4	2	51	0.137652	0.02286
McAllister	0.00475827	1.38333	0.01524	929	1072	0.00289	0.00102	0.013	0.0028702	0.327	0.027178	0.0762	4	2	51	0.137652	0.021082
McAllister	0.00475827	1.33333	0.01524	929	1072	0.00289	0.00102	0.013	0.00635	0.231	0.027178	0.0762	4	2	51	0.137652	0.02032
McAllister	0.00475827	1.38333	0.01524	929	1072	0.00289	0.00102	0.013	0.0047752	0.236	0.027178	0.0762	4	2	51	0.137652	0.021082
McAllister	0.00475827	1.38333	0.01524	929	1072	0.00289	0.00102	0.013	0.003175	0.231	0.027178	0.0762	4	2	51	0.137652	0.021082
McAllister	0.00475827	1.38333	0.01524	929	1072	0.00289	0.00102	0.013	0.002032	0.258	0.027178	0.0762	4	2	51	0.137652	0.021082
McAllister	0.00475827	1.41667	0.01524	929	1072	0.00289	0.00102	0.013	0.00635	0.108	0.027178	0.0762	4	2	51	0.137652	0.02159
McAllister	0.00475827	1.41667	0.01524	929	1072	0.00289	0.00102	0.013	0.003175	0.101	0.027178	0.0762	4	2	51	0.137652	0.02159
McAllister	0.00475827	1.41667	0.01524	929	1072	0.00289	0.00102	0.013	0.0015748	0.103	0.027178	0.0762	4	2	51	0.137652	0.02159
McAllister	0.00475827	1.41667	0.01524	929	1072	0.00289	0.00102	0.013	0.0013208	0.465	0.027178	0.0762	4	2	51	0.137652	0.02159
McAllister	0.00475827	1.45	0.01524	929	1072	0.00289	0.00102	0.013	0.0044704	0.294	0.027178	0.0762	4	2	51	0.280182	0.022098
McAllister	0.00949113	1.08333	0.01524	929	1072	0.00289	0.00102	0.013	0.0044704	0.294	0.027178	0.0762	4	2	51	0.440874	0.01651
McAllister	0.00475827	1.5	0.01524	929	1072	0.00289	0.00102	0.013	0.0044704	0.294	0.027178	0.0762	4	2	51	0.430025	0.02286
McAllister	0.00949113	0.916667	0.01524	929	1072	0.00289	0.00102	0.013	0.0044704	0.294	0.027178	0.0762	4	2	51	0.426209	0.01397
McAllister	0.00475827	1.66667	0.00762	929	1072	0.00289	0.00102	0.013	0.0044704	0.294	0.027178	0.0762	4	2	51	0.137652	0.0127
McAllister	0.00949113	1.41667	0.00762	929	1072	0.00289	0.00102	0.013	0.0044704	0.294	0.027178	0.0762	4	2	51	0.136917	0.010795
McAllister	0.00475827	1.75	0.00762	929	1072	0.00289	0.00102	0.013	0.0044704	0.294	0.027178	0.0762	4	2	51	0.280182	0.013335
McAllister	0.00475827	1.75	0.00762	929	1072	0.00289	0.00102	0.013	0.0044704	0.294	0.027178	0.0762	4	2	51	0.430025	0.013335
McAllister	0.00475827	1.16667	0.02286	929	1072	0.00289	0.00102	0.013	0.0044704	0.294	0.027178	0.0762	4	2	51	0.137652	0.02667
McAllister	0.00949113	1	0.02286	929	1072	0.00289	0.00102	0.013	0.0044704	0.294	0.027178	0.0762	4	2	51	0.136917	0.02286
McAllister	0.00475827	1.21667	0.02286	849	1072	0.00289	0.00102	0.013	0.0044704	0.294	0.027178	0.0762	4	2	51	0.280182	0.027813
McAllister	0.00949113	0.916667	0.02286	849	1072	0.00289	0.00102	0.013	0.0044704	0.294	0.027178	0.0762	4	2	51	0.440874	0.020955
McAllister	0.00475827	1.16667	0.02286	849	1072	0.00289	0.00102	0.013	0.0044704	0.294	0.027178	0.0762	4	2	51	0.430025	0.02667
McAllister	0.00475827	1.66667	0.01524	849	1000	0.00221	0.0009	0.0107	0.0044704	0.294	0.027178	0.0762	4	2	51	0.137652	0.0254
McAllister	0.00949113	1.5	0.01524	849	1000	0.00221	0.0009	0.0107	0.0044704	0.294	0.027178	0.0762	4	2	51	0.136917	0.02286
McAllister	0.00475827	1.75	0.01524	849	1000	0.00221	0.0009	0.0107	0.0015748	0.103	0.027178	0.0762	4	2	51	0.137652	0.02667
McAllister	0.00475827	1.66667	0.01524	849	1000	0.00221	0.0009	0.0107	0.00635	0.108	0.027178	0.0762	4	2	51	0.137652	0.0254
McAllister	0.00475827	1.66667	0.01524	849	1000	0.00221	0.0009	0.0107	0.002032	0.258	0.027178	0.0762	4	2	51	0.137652	0.0254
McAllister	0.00475827	1.66667	0.01524	849	1000	0.00221	0.0009	0.0107	0.00635	0.231	0.027178	0.0762	4	2	51	0.137652	0.0254
McAllister	0.00475827	1.66667	0.01524	849	1000	0.00221	0.0009	0.0107	0.00635	0.405	0.027178	0.0762	4	2	51	0.137652	0.0254
McAllister	0.00475827	1.66667	0.01524	849	1000	0.00221	0.0009	0.0107	0.0044704	0.294	0.027178	0.0762	4	2	51	0.430025	0.0254
McAllister	0.00949113	1.5	0.01524	849	1000	0.00221	0.0009	0.0107	0.0044704	0.294	0.027178	0.0762	4	2	51	0.426209	0.02286
McAllister	0.00949113	1.5	0.01524	849	1000	0.00221	0.0009	0.0107	0.0044704	0.294	0.027178	0.0762	4	2	51	0.85596	0.02286
McAllister	0.00475827	1.5	0.01524	849	1000	0.00221	0.0009	0.0107	0.0044704	0.294	0.027178	0.0762	4	2	51	0.137652	0.02286
McAllister	0.00949113	1.28333	0.01524	849	1000	0.00221	0.0009	0.0107	0.0044704	0.294	0.027178	0.0762	4	2	51	0.136917	0.019558
McAllister	0.00475827	1.41667	0.01524	849	1000	0.00221	0.0009	0.0107	0.0044704	0.294	0.027178	0.0762	4	2	51	0.430025	0.02159
McAllister	0.00949113	1.16667	0.01524	849	1000	0.00221	0.0009	0.0107	0.0044704	0.294	0.027178	0.0762	4	2	51	0.426209	0.01778
McAllister	0.00475827	1.91667	0.00762	849	1000	0.00221	0.0009	0.0107	0.0044704	0.294	0.027178	0.0762	4	2	51	0.137652	0.014605
McAllister	0.00949113	1.7	0.00762	849	1000	0.00221	0.0009	0.0107	0.0044704	0.294	0.027178	0.0762	4	2	51	0.136917	0.012954
McAllister	0.00475827	1.91667	0.00762	849	1000	0.00221	0.0009	0.0107	0.0044704	0.294	0.027178	0.0762	4	2	51	0.430025	0.014605
McAllister	0.00949113	1.58333	0.00762	849	1000	0.00221	0.0009	0.0107	0.0044704	0.294	0.027178	0.0762	4	2	51	0.426209	0.012065
McAllister	0.00475827	1.16667	0.02286	849	1000	0.00221	0.0009	0.0107	0.0044704	0.294	0.027178	0.0762	4	2	51	0.137652	0.02667
McAllister	0.00949113	0.95	0.02286	849	1000	0.00221	0.0009	0.0107	0.0044704	0.294	0.027178	0.0762	4	2	51	0.136917	0.021717
McAllister	0.00475827	1.06667	0.02286	849	1000	0.00221	0.0009	0.0107	0.0044704	0.294	0.027178	0.0762	4	2	51	0.430025	0.024384
McAllister	0.00949113	0.75	0.02286	849	1000	0.00221	0.0009	0.0107	0.0044704	0.294	0.027178	0.0762	4	2	51	0.426209	0.017145
McAllister	0.00475827	1.33333	0.01524	849	1000	0.00221	0.0009	0.0107	0.0015748	0.103	0.027178	0.0762	4	2	51	0.137652	0.02032
McAllister	0.00475827	1.33333	0.01524	849	1000	0.00221	0.0009	0.0107	0.00635	0.108	0.027178	0.0762	4	2	51	0.137652	0.02032
McAllister	0.00475827	1.41667	0.01524	849	1000	0.00221	0.0009	0.0107	0.002032	0.258	0.027178	0.0762	4	2	51	0.137652	0.02159
McAllister	0.00475827	1.41667	0.01524	849	1000	0.00221	0.0009	0.0107	0.00635	0.231	0.027178	0.0762	4	2	51	0.137652	0.02159
McAllister	0.00475827	1.5	0.01524	849	1000	0.00221	0.0009	0.0107	0.00635	0.405	0.027178	0.0762	4	2	51	0.137652	0.02286
McAllister	0.00475827	1.5	0.01524	849	1000	0.00221	0.0009	0.0107	0.0047752	0.41	0.027178	0.0762	4	2	51	0.137652	0.02286
McAllister	0.00475827	1.43333	0.01524	849	1000	0.00221	0.0009	0.0107	0.0013208	0.465	0.027178	0.0762	4	2	51	0.137652	0.021844
McAllister	0.00475827	1.45	0.01524	849	1000	0.00221	0.0009	0.0107	0.0047752	0.236	0.027178	0.0762	4	2	51	0.137652	0.022098
McAllister	0.00949113	1.66667	0.01524	858	1046	0.00239	0.00092	0.0106	0.0044704	0.294	0.027178	0.0762	4	2	51	0.426209	0.0254
McAllister	0.00475827	1.83333	0.01524	858	1046	0.00239	0.00092	0.0106	0.0044704	0.294	0.027178	0.0762	4	2	51	0.137652	0.02794
McAllister	0.00949113	1.66667	0.01524	858	1046	0.00239	0.00092	0.0106	0.0044704	0.294	0.027178	0.0762	4	2	51	0.136917	0.0254
McAllister	0.00475827	1.66667	0.01524	858	1046	0.00239	0.00092	0.0106	0.0015748	0.103	0.027178	0.0762	4	2	51	0.137652	0.0254
McAllister	0.00475827	1.66667	0.01524	858	1046	0.00239	0.00092	0.0106	0.0044704	0.294	0.027178	0.0762	4	2	51	1.28455	0.0254
McAllister	0.00475827	1.58333	0.01524	858	1046	0.00239	0.00092	0.0106	0.0044704	0.294	0.027178	0.0762	4	2	51	0.137652	0.02413
McAllister	0.00475827	1.5	0.01524	858	1046	0.00239	0.00092	0.0106	0.0015748	0.103	0.027178	0.0762	4	2	51	0.137652	0.02286
McAllister	0.00475827	1.58333	0.01524	858	1046	0.00239	0.00092	0.0106	0.003175	0.101	0.027178	0.0762	4	2	51	0.137652	0.02413
McAllister	0.00475827	1.58333	0.01524	858	1046	0.00239	0.00092	0.0106	0.00635	0.108	0.027178	0.0762	4	2	51	0.137652	0.02413
McAllister	0.00475827	1.66667	0.01524	858	1046	0.00239	0.00092	0.0106	0.002032	0.258	0.027178	0.0762	4	2	51	0.137652	0.0254
McAllister	0.00475827	1.66667	0.01524	858	1046	0.00239	0.00092	0.0106	0.003175	0.231	0.027178	0.0762	4	2	51	0.137652	0.0254
McAllister	0.00475827	1.58333	0.01524	858	1046	0.00239	0.00092	0.0106	0.0047752	0.236	0.027178	0.0762	4	2	51	0.137652	0.02413
McAllister	0.00475827	1.58333	0.01524	858	1046	0.00239	0.00092	0.0106	0.00635	0.231	0.027178	0.0762	4	2	51	0.137652	0.02413
McAllister	0.00475827	1.66667	0.01524	858	1046	0.00239	0.00092	0.0106	0.0028702	0.327	0.027178	0.0762	4	2	51	0.137652	0.0254
McAllister	0.00475827	1.58333	0.01524	858	1046	0.00239	0.00092	0.0106	0.0044704	0.294	0.027178	0.0762	4	2	51	0.137652	0.02413
McAllister	0.00949113	1.41667	0.01524	858	1046	0.00239	0.00092	0.0106	0.0044704	0.294	0.027178	0.0762	4	2	51	0.136917	0.02159
McAllister	0.00475827	1.66667	0.01524	858	1046	0.00239	0.00092	0.0106	0.0047752	0.41	0.027178	0.0762	4	2	51	0.137652	0.0254
McAllister	0.00475827	1.66667	0.01524	858	1046	0.00239	0.00092	0.0106	0.00635	0.405	0.027178	0.0762	4	2	51	0.137652	0.0254
McAllister	0.00475827	1.5	0.01524	858	1046	0.00239	0.00092	0.0106	0.0044704	0.294	0.027178	0.0762	4	2	51	0.280182	0.02286
McAllister	0.00949113	1.2	0.01524	858	1046	0.00239	0.00092	0.0106	0.0044704	0.294	0.027178	0.0762	4	2	51	0.426209	0.018288
McAllister	0.00475827	1.53333	0.01524	858	1046	0.00239	0.00092	0.0106	0.0044704	0.294	0.027178	0.0762	4	2	51	0.860927	0.023368
McAllister	0.00712047	1.33333	0.01524	858	1046	0.00239	0.00092	0.0106	0.0044704	0.294	0.027178	0.0762	4	2	51	0.856512	0.02032
McAllister	0.00475827	2	0.00762	858	1046	0.00239	0.00092	0.0106	0.0044704	0.294	0.027178	0.0762	4	2	51	0.137652	0.01524
McAllister	0.00949113	1.83333	0.00762	858	1046	0.00239	0.00092	0.0106	0.0044704	0.294	0.027178	0.0762	4	2	51	0.136917	0.01397
McAllister	0.00475827	2	0.00762	858	1046	0.00239	0.00092	0.0106	0.0044704	0.294	0.027178	0.0762	4	2	51	0.430025	0.01524
McAllister	0.00949113	1.83333	0.00762	858	1046	0.00239	0.00092	0.0106	0.0044704	0.294	0.027178	0.0762	4	2	51	0.426209	0.01397
McAllister	0.00475827	2	0.00762	858	1046	0.00239	0.00092	0.0106	0.0044704	0.294	0.027178	0.0762	4	2	51	0.860927	0.01524
McAllister	0.00712047	1.83333	0.00762	858	1046	0.00239	0.00092	0.0106	0.0044704	0.294	0.027178	0.0762	4	2	51	0.856512	0.01397
McAllister	0.00475827	1.33333	0.02286	858	1046	0.00239	0.00092	0.0106	0.0044704	0.294	0.027178	0.0762	4	2	51	0.137652	0.03048
McAllister	0.00949113	1.08333	0.02286	858	1046	0.00239	0.00092	0.0106	0.0044704	0.294	0.027178	0.0762	4	2	51	0.136917	0.024765
McAllister	0.00475827	1.16667	0.02286	858	1046	0.00239	0.00092	0.0106	0.0044704	0.294	0.027178	0.0762	4	2	51	0.430025	0.02667
McAllister	0.00949113	1	0.02286	858	1046	0.00239	0.00092	0.0106	0.0044704	0.294	0.027178	0.0762	4	2	51	0.426209	0.02286
McAllister	0.00475827	1.16667	0.02286	858	1046	0.00239	0.00092	0.0106	0.0044704	0.294	0.027178	0.0762	4	2	51	0.860927	0.02667
McAllister	0.00712047	1.08333	0.02286	858	1046	0.00239	0.00092	0.0106	0.0044704	0.294	0.027178	0.0762	4	2	51	0.856512	0.024765
McAllister	0.00475827	1.5	0.03048	858	1046	0.00239	0.00092	0.0106	0.0044704	0.294	0.027178	0.0762	4	2	51	0.137652	0.04572
McAllister	0.00949113	1	0.03048	858	1046	0.00239	0.00092	0.0106	0.0044704	0.294	0.027178	0.0762	4	2	51	0.136917	0.03048
McAllister	0.00475827	1.08333	0.03048	858	1046	0.00239	0.00092	0.0106	0.0044704	0.294	0.027178	0.0762	4	2	51	0.430025	0.03302
McAllister	0.00949113	0.916667	0.03048	858	1046	0.00239	0.00092	0.0106	0.0044704	0.294	0.027178	0.0762	4	2	51	0.426209	0.02794
McAllister	0.00475827	1.08333	0.03048	858	1046	0.00239	0.00092	0.0106	0.0044704	0.294	0.027178	0.0762	4	2	51	0.860927	0.03302
McAllister	0.00712047	1	0.03048	858	1046	0.00239	0.00092	0.0106	0.0044704	0.294	0.027178	0.0762	4	2	51	0.856512	0.03048
McAllister	0.00475827	1.66667	0.01524	882	1327	0.00229	0.00174	0.012	0.0044704	0.294	0.027178	0.0762	4	2	51	0.137652	0.0254
McAllister	0.00949113	1.5	0.01524	882	1327	0.00229	0.00174	0.012	0.0044704	0.294	0.027178	0.0762	4	2	51	0.136917	0.02286
McAllister	0.00475827	1.58333	0.01524	882	1327	0.00229	0.00174	0.012	0.0044704	0.294	0.027178	0.0762	4	2	51	0.430025	0.02413
McAllister	0.00475827	1.5	0.01524	882	1327	0.00229	0.00174	0.012	0.0044704	0.294	0.027178	0.0762	4	2	51	0.860927	0.02286
McAllister	0.00475827	2	0.00762	882	1327	0.00229	0.00174	0.012	0.0044704	0.294	0.027178	0.0762	4	2	51	0.137652	0.01524
McAllister	0.00475827	2	0.00762	882	1327	0.00229	0.00174	0.012	0.0044704	0.294	0.027178	0.0762	4	2	51	0.137652	0.01524
McAllister	0.00949113	1.83333	0.00762	882	1327	0.00229	0.00174	0.012	0.0044704	0.294	0.027178	0.0762	4	2	51	0.136917	0.01397
McAllister	0.00475827	1.91667	0.00762	882	1327	0.00229	0.00174	0.012	0.0044704	0.294	0.027178	0.0762	4	2	51	0.430025	0.014605
McAllister	0.00475827	1.83333	0.00762	882	1327	0.00229	0.00174	0.012	0.0044704	0.294	0.027178	0.0762	4	2	51	0.860927	0.01397
McAllister	0.00475827	1.5	0.02286	882	1327	0.00229	0.00174	0.012	0.0044704	0.294	0.027178	0.0762	4	2	51	0.137652	0.03429
McAllister	0.00949113	1.33333	0.02286	882	1327	0.00229	0.00174	0.012	0.0044704	0.294	0.027178	0.0762	4	2	51	0.136917	0.03048
McAllister	0.00475827	1.33333	0.02286	882	1327	0.00229	0.00174	0.012	0.0044704	0.294	0.027178	0.0762	4	2	51	0.430025	0.03048
McAllister	0.00475827	1.41667	0.02286	882	1327	0.00229	0.00174	0.012	0.0044704	0.294	0.027178	0.0762	4	2	51	0.860927	0.032385
McAllister	0.00475827	1.33333	0.02286	882	1327	0.00229	0.00174	0.012	0.0044704	0.294	0.027178	0.0762	4	2	51	1.28455	0.03048
McAllister	0.0227753	0.833333	0.0254	1002	1366	0.00103	0.00157	0.0165	0.003175	0.23	0.0508	0.0762	1	2	31	1.7449	0.0211667
McAllister	0.00905933	1	0.0127	1002	1366	0.00103	0.00157	0.0165	0.003175	0.23	0.0508	0.0762	1	2	31	1.75064	0.0127
McAllister	0.0056642	1.1	0.0127	1002	1366	0.00103	0.00157	0.0165	0.003175	0.23	0.0508	0.0762	1	2	31	1.7418	0.01397
McAllister	0.0056642	1.08333	0.0254	1002	1366	0.00103	0.00157	0.0165	0.003175	0.23	0.0508	0.0762	1	2	31	1.7418	0.0275167
McAllister	0.0124545	0.833333	0.0254	1002	1366	0.00103	0.00157	0.0165	0.003175	0.23	0.0508	0.0762	1	2	31	1.74953	0.0211667
McAllister	0.0141478	0.666667	0.0254	1002	1366	0.00103	0.00157	0.0165	0.003175	0.23	0.0508	0.0762	1	2	31	1.74384	0.0169333
McAllister	0.0169926	1.16667	0.0127	1002	1366	0.00103	0.00157	0.0165	0.003175	0.23	0.0508	0.0762	1	2	31	1.75309	0.0148167
McAllister	0.0169926	1.66667	0.0127	1002	1366	0.00103	0.00157	0.0165	0.003175	0.23	0.0508	0.0762	1	2	31	1.75309	0.0211667
McAllister	0.0169926	1.08333	0.0254	1002	1366	0.00103	0.00157	0.0165	0.003175	0.23	0.0508	0.0762	1	2	31	1.75309	0.0275167
McAllister	0.0158496	1.08333	0.0254	1002	1366	0.00103	0.00157	0.0165	0.003175	0.23	0.0508	0.0762	1	2	31	1.75294	0.0275167
McAllister	0.0112607	0.5	0.0230886	874	1196	0.00229	0.001196	0.0195	0.0029972	0.23	0.0508	0.0762	3	2	52	1	0.0115443
McAllister	0.011303	0.833333	0.0230886	874	1196	0.00229	0.001196	0.0195	0.0029972	0.23	0.0508	0.0762	3	2	52	0.998503	0.0192405
McAllister	0.012446	0.7	0.0230886	874	1196	0.00229	0.001196	0.0195	0.0029972	0.23	0.0508	0.0762	3	2	52	1	0.016162
McAllister	0.008763	1	0.0230886	874	1196	0.00229	0.001196	0.0195	0.0029972	0.23	0.0508	0.0762	3	2	52	0.998069	0.0230886
McAllister	0.0070612	1.16667	0.0230886	874	1196	0.00229	0.001196	0.0195	0.0029972	0.23	0.0508	0.0762	3	2	52	1	0.0269367
McAllister	0.0057658	1.33333	0.0230886	874	1196	0.00229	0.001196	0.0195	0.0029972	0.23	0.0508	0.0762	3	2	52	1.00294	0.0307848
McAllister	0.00359833	1.5	0.0230886	874	1196	0.00229	0.001196	0.0195	0.0029972	0.23	0.0508	0.0762	3	2	52	1.00472	0.0346329
McAllister	0.0123613	0.5	0.0230886	874	1196	0.00229	0.001196	0.0195	0.0029972	0.23	0.1016	0.0762	3	2	52	1	0.0115443
McAllister	0.013335	0.666667	0.0230886	874	1196	0.00229	0.001196	0.0195	0.0029972	0.23	0.1016	0.0762	3	2	52	0.998731	0.0153924
McAllister	0.0121073	0.833333	0.0230886	874	1196	0.00229	0.001196	0.0195	0.0029972	0.23	0.1016	0.0762	3	2	52	1	0.0192405
McAllister	0.010541	1	0.0230886	874	1196	0.00229	0.001196	0.0195	0.0029972	0.23	0.1016	0.0762	3	2	52	0.998395	0.0230886
McAllister	0.00618067	1.33333	0.0230886	874	1196	0.00229	0.001196	0.0195	0.0029972	0.23	0.1016	0.0762	3	2	52	1	0.0307848
McAllister	0.0154093	0.383333	0.0230886	814	1001	0.0018	0.001002	0.0112	0.0029972	0.23	0.0508	0.0762	1	2	52	1	0.00885063
McAllister	0.0154347	0.5	0.0230886	814	1001	0.0018	0.001002	0.0112	0.0029972	0.23	0.0508	0.0762	1	2	52	0.998904	0.0115443
McAllister	0.0123613	0.666667	0.0230886	814	1001	0.0018	0.001002	0.0112	0.0029972	0.23	0.0508	0.0762	1	2	52	1	0.0153924
McAllister	0.009779	1	0.0230886	814	1001	0.0018	0.001002	0.0112	0.0029972	0.23	0.0508	0.0762	1	2	52	0.99827	0.0230886
McAllister	0.0059182	1.33333	0.0230886	814	1001	0.0018	0.001002	0.0112	0.0029972	0.23	0.0508	0.0762	1	2	52	1.00287	0.0307848
McAllister	0.0178647	0.416667	0.0230886	814	1001	0.0018	0.001002	0.0112	0.0029972	0.23	0.0508	0.0762	1	2	52	1	0.00962025
McAllister	0.02032	0.466667	0.0230886	814	1001	0.0018	0.001002	0.0112	0.0029972	0.23	0.0508	0.0762	1	2	52	1	0.0107747
McAllister	0.0142663	0.666667	0.0230886	814	1001	0.0018	0.001002	0.0112	0.0029972	0.23	0.0508	0.0762	1	2	52	1.00119	0.0153924
McAllister	0.011557	1	0.0230886	814	1001	0.0018	0.001002	0.0112	0.0029972	0.23	0.0508	0.0762	1	2	52	1.00147	0.0230886
McAllister	0.00694267	1.33333	0.0230886	814	1001	0.0018	0.001002	0.0112	0.0029972	0.23	0.0508	0.0762	1	2	52	1	0.0307848
McAllister	0.00727287	1.21	0.004445	996	805	0.00106	0.000614	0.0101	0.00079502	0.25	0.0508	0.0254	4	1	1	1.15829	0.00537845
McAllister	0.00412073	1.21	0.0031496	996	805	0.00106	0.000614	0.0101	0.00079502	0.25	0.0508	0.0254	4	1	1	0.164354	0.00381102
McAllister	0.00483362	1.21	0.0033528	996	805	0.00106	0.000614	0.0101	0.00079502	0.25	0.0508	0.0254	4	1	1	0.413119	0.00405689
McAllister	0.0122343	1.21	0.0067056	996	805	0.00106	0.000614	0.0101	0.00079502	0.25	0.0508	0.0254	4	1	1	2.57673	0.00811378
McAllister	0.008382	1.21	0.0051308	996	805	0.00106	0.000614	0.0101	0.00079502	0.25	0.0508	0.0254	4	1	1	1.36842	0.00620827
McAllister	0.00808567	1.21	0.0045466	996	805	0.00106	0.000614	0.0101	0.00079502	0.25	0.0508	0.0254	4	1	1	1.39348	0.00550139
McAllister	0.0258487	1.21	0.011049	996	805	0.00106	0.000614	0.0101	0.00079502	0.25	0.0508	0.0254	4	1	1	6.48284	0.0133693
McAllister	0.00691727	1.21	0.0039624	996	805	0.00106	0.000614	0.0101	0.00079502	0.25	0.0508	0.0254	4	1	1	1.0425	0.0047945
McAllister	0.00613833	1.21	0.0037592	996	805	0.00106	0.000614	0.0101	0.00079502	0.25	0.0508	0.0254	4	1	1	0.781327	0.00454863
McAllister	0.0105071	1.21	0.0057404	996	805	0.00106	0.000614	0.0101	0.00079502	0.25	0.0508	0.0254	4	1	1	1.97602	0.00694588
McAllister	0.0207518	1.21	0.0096774	996	805	0.00106	0.000614	0.0101	0.00079502	0.25	0.0508	0.0254	4	1	1	4.92029	0.0117097
McAllister	0.016129	1.21	0.0076962	996	805	0.00106	0.000614	0.0101	0.00079502	0.25	0.0508	0.0254	4	1	1	3.62379	0.0093124
McAllister	0.0115485	0.998333	0.0071882	996	805	0.00106	0.000614	0.0101	0.00079502	0.25	0.0508	0.0254	4	1	1	2.26316	0.00717622
McAllister	0.0149267	0.998333	0.0084836	996	805	0.00106	0.000614	0.0101	0.00079502	0.25	0.0508	0.0254	4	1	1	3.23798	0.00846946
McAllister	0.00761153	0.998333	0.0051816	996	805	0.00106	0.000614	0.0101	0.00079502	0.25	0.0508	0.0254	4	1	1	1.22525	0.00517296
McAllister	0.0186267	0.998333	0.0101092	996	805	0.00106	0.000614	0.0101	0.00079502	0.25	0.0508	0.0254	4	1	1	4.37897	0.0100924
McAllister	0.0214037	0.998333	0.0112776	996	805	0.00106	0.000614	0.0101	0.00079502	0.25	0.0508	0.0254	4	1	1	5.16585	0.0112588
McAllister	0.021463	0.998333	0.0114046	996	805	0.00106	0.000614	0.0101	0.00079502	0.25	0.0508	0.0254	4	1	1	5.29032	0.0113856
McAllister	0.0205571	0.595	0.0175514	996	805	0.00106	0.000614	0.0101	0.00079502	0.25	0.0508	0.0254	4	1	1	4.83654	0.0104431
McAllister	0.00564727	0.595	0.0065024	996	805	0.00106	0.000614	0.0101	0.00079502	0.25	0.0508	0.0254	4	1	1	0.675879	0.00386893
McAllister	0.0182118	0.595	0.0183896	996	805	0.00106	0.000614	0.0101	0.00079502	0.25	0.0508	0.0254	4	1	1	4.35075	0.0109418
McAllister	0.0164423	0.595	0.0153924	996	805	0.00106	0.000614	0.0101	0.00079502	0.25	0.0508	0.0254	4	1	1	3.855	0.00915848
McAllister	0.0160528	0.595	0.0153924	996	805	0.00106	0.000614	0.0101	0.00079502	0.25	0.0508	0.0254	4	1	1	3.74	0.00915848
McAllister	0.0079248	0.595	0.0074676	996	805	0.00106	0.000614	0.0101	0.00079502	0.25	0.0508	0.0254	4	1	1	1.25	0.00444322
McAllister	0.00497417	0.291667	0.013843	996	805	0.00106	0.000614	0.0101	0.00079502	0.25	0.0508	0.0254	4	1	1	0.42944	0.00403754
McAllister	0.0061722	0.291667	0.0161798	996	805	0.00106	0.000614	0.0101	0.00079502	0.25	0.0508	0.0254	4	1	1	0.748201	0.00471911
McAllister	0.00737447	0.291667	0.0179832	996	805	0.00106	0.000614	0.0101	0.00079502	0.25	0.0508	0.0254	4	1	1	1.18844	0.0052451
McAllister	0.0125391	0.291667	0.0272288	996	805	0.00106	0.000614	0.0101	0.00079502	0.25	0.0508	0.0254	4	1	1	2.66584	0.00794173
McAllister	0.00454914	1.21	0.0025654	996	805	0.00106	0.000614	0.0101	0.00079502	0.25	0.0508	0.0254	4	1	1	1.5919	0.00310413
McAllister	0.0104411	1.21	0.005334	996	805	0.00106	0.000614	0.0101	0.00079502	0.25	0.0508	0.0254	4	1	1	5.19076	0.00645414
McAllister	0.00730419	1.21	0.0043434	996	805	0.00106	0.000614	0.0101	0.00079502	0.25	0.0508	0.0254	4	1	1	3.43092	0.00525551
McAllister	0.0212725	1.21	0.0090932	996	805	0.00106	0.000614	0.0101	0.00079502	0.25	0.0508	0.0254	4	1	1	12.2586	0.0110028
McAllister	0.00232241	1.21	0.0022606	996	805	0.00106	0.000614	0.0101	0.00079502	0.25	0.0508	0.0254	4	1	1	0.432376	0.00273533
McAllister	0.0167996	1.21	0.0076962	996	805	0.00106	0.000614	0.0101	0.00079502	0.25	0.0508	0.0254	4	1	1	8.66959	0.0093124
McAllister	0.00583015	0.998333	0.0040386	996	805	0.00106	0.000614	0.0101	0.00079502	0.25	0.0508	0.0254	4	1	1	2.41567	0.00403187
McAllister	0.00878925	0.998333	0.004953	996	805	0.00106	0.000614	0.0101	0.00079502	0.25	0.0508	0.0254	4	1	1	3.98847	0.00494474
McAllister	0.0120735	0.998333	0.0062484	996	805	0.00106	0.000614	0.0101	0.00079502	0.25	0.0508	0.0254	4	1	1	5.92233	0.00623799
McAllister	0.0170417	0.998333	0.0079756	996	805	0.00106	0.000614	0.0101	0.00079502	0.25	0.0508	0.0254	4	1	1	8.82812	0.00796231
McAllister	0.0186656	0.998333	0.0085852	996	805	0.00106	0.000614	0.0101	0.00079502	0.25	0.0508	0.0254	4	1	1	9.93552	0.00857089
McAllister	0.00481923	0.291667	0.0106934	996	805	0.00106	0.000614	0.0101	0.00079502	0.25	0.0508	0.0254	4	1	1	1.80118	0.00311891
McAllister	0.0096012	1.21	0.0052832	996	805	0.00106	0.000614	0.0101	0.00079502	0.25	0.0508	0.0254	4	1	1	0.448276	0.00639267
McAllister	0.0103124	0.998333	0.0067818	996	805	0.00106	0.000614	0.0101	0.00079502	0.25	0.0508	0.0254	4	1	1	0.507426	0.0067705
McAllister	0.0173821	0.998333	0.01143	996	805	0.00106	0.000614	0.0101	0.00079502	0.25	0.0508	0.0254	4	1	1	1.47648	0.0114109
McAllister	0.0116679	1.21	0.0059436	996	805	0.00106	0.000614	0.0101	0.00079502	0.25	0.0508	0.0254	4	1	1	0.181904	0.00719176
McAllister	0.0138091	1.21	0.010287	996	805	0.00106	0.000614	0.0101	0.00079502	0.25	0.0508	0.0254	4	1	1	0.350166	0.0124473
McAllister	0.0111269	1.21	0.0058166	996	805	0.00106	0.000614	0.0101	0.00079502	0.25	0.0508	0.0254	4	1	1	0.117517	0.00703809
McAllister	0.003175	1.25	0.01524	1088	950	0.00098	0.00308	0.0145	0.003175	0.23	0.0508	0.0762	4	1	8	5.69643	0.01905
[truncated: 1,055 more rows]

## Sheet: Legend
Ct-Code der folgenden Bilder wurde im Preprocessing gröber eingeteilt in: 1 metallisch, 2 Kunststoff, 3 keramisch
Legend retrieved from McAllister
